# Supplementary material for: A large-scale resource for tissue-specific CRISPR mutagenesis in Drosophila
Source: eLife. 2020 Feb 13;9:e53865. doi: 10.7554/eLife.53865 (PMC7062466; doi:10.7554/eLife.53865)
Supplement: Supplementary file 1. [file elife-53865-supp1.xlsx]

## Sheet: flyline_flyline-72
name	sgRNA_1	sgRNA_2	primary_gene	primary_gene_symbol	secondary_gene	comment
CFDlib00001	GATCTGCTGACTCTCACCAG	GGGCGTTGGCCTCATGTTCC	FBgn0032752
CFDlib00003	TGAGGGTCTATCGCTAACCG	TCAGGGTCCCAGTCAGCAGA	FBgn0036428	Gbs-70E
CFDlib00004	GGACTTTCCGGAAGTCTACA	CCAGAGCATCGCGCAGCAGT	FBgn0042711	Hex-t1
CFDlib00005	CGTTTACAACTGGAGTACTG	AACACAAGATTCAGAATATG	FBgn0036266
CFDlib00006	TTTGAGCGGGCCATCGAGTC	GATCATGGACGGCACGGACG	FBgn0024947	NTPase
CFDlib00007	CTCGATGCGTCCCGTCGTCC	GCAGGTGCGGAGCCATCTCG	FBgn0259822	Ca-beta
CFDlib00008	CGTCTGTGCCCAGCTGCTTC	TGCCGAAGCAGATGACCTTG	FBgn0026602	Ady43A
CFDlib00009	ACAAGGCAGCCTACATAATG	GCGGTGGAACACTATTTTTC	FBgn0260935	Vps15
CFDlib00010	CCTCCATGAAGCAGGTCCAA	GGAGGAGCGGATTAGGAACT	FBgn0050184
CFDlib00011	ATCTCTTTCCGAGCGCAGCC	GGTTAGAGTGGAGTAACTCT	FBgn0051183
CFDlib00012	ACCGCCTGCAGAGCGGGAGC	GAAATGGGACTTGGCCACGG	FBgn0034997
CFDlib00014	GAAAGAGAACATTCAGCCGC	GCCTCCTTCAGATCCTCTAA	FBgn0263855	BubR1
CFDlib00015	CATACATGGCCATGCTGGCG	TGAGGGCCACCCAGATCAGC	FBgn0037164
CFDlib00016	GCCACCGGCGGGGTTTGCTG	TGCTCGGTTTCACATCCCGA	FBgn0024326	Mkk4
CFDlib00017	ATGTTGGAGGATCCATCCAA	GCTGACGCGTTTCGTGCTGC	FBgn0032820	fbp
CFDlib00019	AGTTCCGAGCACCACCACAG	GAAAAGAGAAACCACCGGCT	FBgn0259227
CFDlib00020	GCACTGCGAACGTGGGATAT	GTAGAAGGCTCTGTGTTGGG	FBgn0031397
CFDlib00022	CCATCAGTACAAGTTCTGCG	ATCGAATCGCGGAAATGTGC	FBgn0260972	alc
CFDlib00023	CGAGCCGCTGCGTCCCAATC	AGCCTAAAGCCTGCTGGTTC	FBgn0263980
CFDlib00025	CATATGTACGCCAGCTGAAG	GTGTGCCAATGTCCACGCTG	FBgn0016131	Cdk4
CFDlib00026	GACCCCACTCCAAATGCCAA	GGAAGCAGTACCAACGTTAA	FBgn0004584	Rrp1
CFDlib00028	TGTGGCTGTGACCACAATGA	GCCAGATAATCGATAGAGTG	FBgn0022800	Cad96Ca
CFDlib00029	ATGTTTAAATCTGGTCAATA	TTATATTGTACAGTGTTTGA	FBgn0003256	rl
CFDlib00030	CTCCTTCTCGGCAGACTCGA	CAATGGCGGCTAACAAGGAG	FBgn0000150	awd
CFDlib00031	CGCGCTCTATTTCCGACGAG	TCTGGATGAAGATTGCCGCT	FBgn0265959	rdgC
CFDlib00032	TGGGGGAGGAGCTATGCAGA	AGGCACTCGTAGAGCTAATG	FBgn0037315	Cerk
CFDlib00034	TCACTACAAGCGTAATCCCA	GTCGGAGAGCCTGAACAGCT	FBgn0000382	csw
CFDlib00035	CAACTCCCACTTTGTCAAGC	AGCGAGCATTTTGCTTGATG	FBgn0003502	Btk29A
CFDlib00036	GGTTGTCGGCATCTGCGCGA	GTTTGTTGAGAAGCCTGTGT	FBgn0027279	l(1)G0196
CFDlib00037	GGGAAGCTCCTGATCACTCT	CGTAGTCCTTCCCGTGGCGC	FBgn0031267	Ipk2
CFDlib00038	GCGTCTGAACAACCTGATTC	ATACTTTGGCAACGTTCACC	FBgn0002466	sti
CFDlib00039	TGACACCTAGTGGGTACGGG	TCGCTTCACTTTGATCTTCG	FBgn0033773	Mos
CFDlib00040	CACCCGATGTACTAGTCAAC	AGTCATACAGCGCGGTCCAC	FBgn0030018	slpr
CFDlib00041	AAATCTCCGACAGCCGCCAG	ATCGTCGTATACCTCCGACA	FBgn0010015	CanA1
CFDlib00042	TGGCCGACACATAGCCGTCG	ACATCGGTTTCTGGAGCACT	FBgn0034950	Pask
CFDlib00043	GGTGCGTGTTTCCGATTACC	TCCGGTGCTCTTAAAGTTGC	FBgn0039809
CFDlib00044	AACAACACATCGTCCGCCAC	TTGTTTGGCTTTGCCTCCAC	FBgn0004373	fwd
CFDlib00045	GATGACTGCGGCTGTCCATT	ACGCCTCTGCATTTCGCGAC	FBgn0265959	rdgC
CFDlib00046	CAGATCCGCCGGAGATCATC	TTGCGCCACACTATCGATGG	FBgn0000464	Lar
CFDlib00049	GTGGTAAGACTGGAAAGCAC	CTACTGGCGAATGGTTTGGC	FBgn0267486	Ptp36E
CFDlib00050	CGGCACCAGAACAGCCCAAT	ATGATGGTATCGCTCTTGCG	FBgn0030556	mRNA-cap
CFDlib00051	ACTGTGAGCGGTCGCCGAAC	AAGTTCCTCACGGCCAAGTA	FBgn0032297
CFDlib00052	GCACGGATAAAGCAAATCGA	TAGCGTTAGGCAACGATCCT	FBgn0030735
CFDlib00053	AGTGGCCTAGAGATTACTGG	CCTCGTCATACTCGGCCTCA	FBgn0011725	twin
CFDlib00054	ACTGGCTCGCCAACTCCAGG	TTGCATTCGTCACGACACCC	FBgn0010389	htl
CFDlib00055	TCTTTCGGCGCATCGCCGCC	TGCGCTCCAAGAAGCCCGTT	FBgn0050184
CFDlib00056	ATCAAAGTTGTTGAGCTCCC	GGACGCAGCACATGGTCAGA	FBgn0000147	aurA
CFDlib00057	GCAGCGTCCATATGGAGTAT	GTCACAGGTATTTTGGCGGG	FBgn0260990	yata
CFDlib00058	ACAGAACACTAGAGCTAGCG	TGTCAACGTGGATGAAGTTC	FBgn0035089	Phk-3
CFDlib00059	GACGATGGAAGCGAGATTCA	ACCAGCTCCAGCAACGTCGT	FBgn0040079	pkaap
CFDlib00060	ACTGACATGGTCGCTGGTAG	TCACGAGTTCGATCACGGTG	FBgn0259101
CFDlib00062	ACTGAAGTGCGCTGTTGATT	GTATAGATCGCTGTCGCCTT	FBgn0003079	Raf
CFDlib00064	GCTTCCCAGAGTAAGAACAG	GTACGAGACATTGGGTTCGC	FBgn0046332	gskt
CFDlib00065	TGGATGAGGATTGCGGACGA	CAGCAGAGGAGTAGCGTACA	FBgn0039858	CycG
CFDlib00066	GAGCTCCTTGAACTGGTAGT	AAGTATTCGAAGCTGGCCCG	FBgn0037164
CFDlib00067	ATAGTCTGGGGTCGATTGTA	GCTGAGATCCTTGAATACAA	FBgn0019686	lok
CFDlib00068	AGTGCATCCTCCACTGTGGG	ATGTAGCCTTGATGGCGGTC	FBgn0032820	fbp
CFDlib00069	CAAACGTGGACAGTATGCTG	ACGGTCGTCGGACACCATCG	FBgn0262081	Csk
CFDlib00070	GACGTTCGCGATACCACCTC	GTACAGCACTTGCTGGGTAA	FBgn0026371	SAK
CFDlib00071	AGCAGGCGTGATATGCTGAA	TGGATGTGGACTCGGACTCG	FBgn0004863	C15
CFDlib00072	GCTCCTGGCTGGTCAGCAAT	TGTGCATGTGGGTGGCTGAA	FBgn0045759	bin
CFDlib00073	ATTCTCGGTACGCGTACCGA	TGGGCCTCTTGCTTGTCATG	FBgn0039740	ZIPIC
CFDlib00074	GTGTTCGTCCAGCTTCTCAG	GTGCTGGTGCAGTTCCAGCG	FBgn0033459
CFDlib00075	GTTGTTGCGGACATTTCCGG	GGCGAGCAGATGGGGCGGCA	FBgn0004854	B-H2
CFDlib00076	TCTCGCCCAAAGGAAGTCGC	CTTCATGAGTAGCGCTGCCG	FBgn0004595	pros
CFDlib00077	CTGTGTGAAGCACTCGTCTT	AGCCGCTGTCCGGCGAAGAG	FBgn0004865	Eip78C
CFDlib00078	CCTGGATCTCGCGGAGTTTA	TTGTCATCCGCTGATGCCGA	FBgn0003345	sd
CFDlib00079	CAGCGACGGCGTCTCGCGGA	GCTCGCACTCCGCATCCCCC	FBgn0034599	hng1
CFDlib00080	TCCCCAACGCATCACATCGC	GTGCAAATACCACCCGGCTT	FBgn0000625	eyg
CFDlib00081	TCGTATGGATGATACATGGA	GGCGAGCGTGGGCAGCGTCG	FBgn0014343	mirr
CFDlib00082	CAGAGAGACGGCATCCTCCT	ACTTAGTGCAGTTGAACTGC	FBgn0037120
CFDlib00086	CAAGTTATCGTTGATCTCGC	TGATGTTCGGCATTCTGGAG	FBgn0036030
CFDlib00087	TTGTCGTGTGTACGGGACGG	CTGCACATGAGTGGAGGATG	FBgn0260480
CFDlib00088	GAGCTTATCCAGCGCAATGG	TCTCGTACTCCCGCGCGTTC	FBgn0015544	spag
CFDlib00089	CTGGTAATCTACCAGTAATT	GCACAAACCGGATGAATATT	FBgn0264492	CkIIalpha
CFDlib00090	AGGTGCGCAGATATATGATG	GGCAGCATCCTGTGCCCGAA	FBgn0022338	dnk
CFDlib00091	TCCATTGGTCGATGTTGTGA	CTGCGGATTATCGGTGGACC	FBgn0004876	cdi
CFDlib00093	CGGTGGCTCCATCGGCTGGA	AACCTGACCAAGAGCTCCTC	FBgn0267390	dop
CFDlib00095	TTTATTTACAAAAAAGGATG	GATTCGTGCGCTCTGGAGTC	FBgn0010407	Ror
CFDlib00097	AACCTGGGATGATCTGAACA	TGGCACGTTTGGCCGCCTAT	FBgn0034568
CFDlib00098	TCATCTTCTTGATGCAGTTG	GTATCGGATCAGCGTTAACG	FBgn0005666	bt
CFDlib00099	GATGGAATTCAAGCGATTTC	AGCTGATCGGCTAGCAGTTG	FBgn0032702
CFDlib00101	CCGTTTCGGAGCGTTGCAGG	CAAACATATGCTGGAGCTGC	FBgn0266098	rg
CFDlib00102	TCAGTTTCATCACCTCGTGG	TCATGGACATCCGCGGGCAC	FBgn0033791	Drl-2
CFDlib00103	ATACCCAGCCTGGAGTCCCT	CAGGCCCAAAACCAAGCGAA	FBgn0010441	pll
CFDlib00104	TTGCTGGTGAGACGCACAGG	AGCACATCCAGCACGGCCTG	FBgn0267698	Pak
CFDlib00105	TGCATAATCACCTCGGCCAT	GATGATGAGCTCTACTACTC	FBgn0038655
CFDlib00106	GAGTTCCACACATGGTCATA	TGTTTCTCCAAACGCCCGAT	FBgn0026371	SAK
CFDlib00107	TCAACATCACCGCAGTCAAC	ATCCTCTCCGGATGATTTGT	FBgn0032677
CFDlib00108	TCTACTACTCTTGCTGTCGG	ATGTCGGTATGGCGGATGCA	FBgn0266136	Gyc76C
CFDlib00110	GTGCTCGATGGAATGCATGA	GGCCCAATTTAAGTATGCAG	FBgn0263998	Ack-like
CFDlib00111	TTTTCGAACGAGTTCACACC	CTACTCCGCATTTGCATGTT	FBgn0260934	par-1
CFDlib00113	ACTGCGCCGACGACGCGAGG	CCATTTCATGGCTGGTCAGC	FBgn0261873	sdt
CFDlib00114	GTTTCAAGGCGATGCAGGTT	TCTGGATAATATGCACAAAG	FBgn0038446
CFDlib00115	TCTCCCTTGCGCATCAGGAC	GGTGGTTGTCGGTAGCCACC	FBgn0020270	mre11
CFDlib00116	TGTGTGGAGTCGCAGCATCC	ACCGTCAAATACGGCAAAGA	FBgn0027515
CFDlib00117	CGGCCCGAACCGTTTGTGTC	CTATACATTTCCACGCTTGA	FBgn0037327	PEK
CFDlib00118	TGGAGCGCTTCCGCCATCCG	GGCGACTGCTTGAGTGGCTG	FBgn0085385	bma
CFDlib00119	CAGCTTGAAGAGTATCATCC	CTTGAAGTCGTTTGTCCACT	FBgn0036187	RIOK1
CFDlib00121	AATTCGTATCCAAATCCAAG	ATTTGTACCCATATTTGTTG	FBgn0000536	eas
CFDlib00122	TCACACTGCATCGGCGAGAA	CTCACTTCGTTCGCCAACTA	FBgn0030696
CFDlib00123	GCGATTTTACGCGGAGCATA	TCGGATCTGCTGCATTGCAT	FBgn0030573	nmdyn-D6
CFDlib00124	TGTAGGTGTACTCCTGCAGA	AGCCACTTTGTTTTCATCGA	FBgn0263980
CFDlib00125	CGGATCCGCTTGCTTCCTCG	ACAGTACTGCCACGTTGTTA	FBgn0032749	Phlpp
CFDlib00126	TTCGAGGAGAAAGGCCTGAA	CTGCGCTTGCCGCTCGCGGA	FBgn0019990	Gcn2
CFDlib00128	GGGTGGCGTTTCAGCTGTAA	GCCGCCAGCTCATCTTCGGG	FBgn0024329	Mekk1
CFDlib00129	AAACGTACTGCGAAGTGTGC	AAGAGCAAGTGCCACCTGGG	FBgn0000274	Pka-C2
CFDlib00130	GAACGGCAAGCGACTGCCCG	GCTTTCGGCTTGGCTACACG	FBgn0027889	ball
CFDlib00131	TGCTTGGCGGGTTCACAGTG	GCGGGTTGCCGCATCCGACC	FBgn0036337	AdenoK
CFDlib00132	AACATGCAGGAGTTAATAGT	GCTGAGTGCATCCACGCTAG	FBgn0039742
CFDlib00133	CTTAAGAAACTGATCCAAGT	TCTTGTTCGGCATATGCACG	FBgn0020440	Fak
CFDlib00134	GCCAAGGAGACGGTGGAAAT	AGTTGATGCAAATGTACCGC	FBgn0032779
CFDlib00135	TCGTCCTCCGGCGTGGCCAG	AGGCCACTGGGCTGCTGGAG	FBgn0000017	Abl
CFDlib00136	GCTCGATGTATTGGCGCCCA	AGGTGTGCATTGTCCAAAAG	FBgn0052944
CFDlib00137	CTTCTTCGTGATGCACTTGA	GCCATGGCCCAGCATATCCT	FBgn0260945	Atg1
CFDlib00138	AGTACAATGCTGGGCCTTGC	ATACAGCTATACTGGCGATT	FBgn0024179	wit
CFDlib00139	GTGGACGCATTAAGCTTAAA	ATCGCATCCCAGGTCCGCAG	FBgn0005592
CFDlib00140	GTGCTTGTGACAGTAGTAGA	ATCAAGGCCAGTTGGGGCAG	FBgn0262617
CFDlib00141	TACCCGCACAGTGTTTACGT	TGTTTACTTTCCCACCACGT	FBgn0011829	Ret
CFDlib00142	GTTTGTCCTGCTCATCCGAC	ATCTCGATCATCTGGATGAT	FBgn0003366	sev
CFDlib00143	ATCCGATTGTTAGCAAGTTG	GGCGGAGCTTTACTACGTGC	FBgn0015380	drl
CFDlib00144	GTCATCCGGACCGTTTTTTG	TCACCGTCAGCGGCGATCCC	FBgn0035484
CFDlib00145	CACAGAGTTGGCCGCGGCGT	TTGTCGGCCAGGCTCGCGGA	FBgn0025742	mtm
CFDlib00146	GGTAACGTTCAGCACACAGT	CGCACTCACAGCGTCCGTTG	FBgn0243512	puc
CFDlib00147	GCTCCTATGTGGTGCACAAG	ATGAAGTCCCGCCTCCGCAA	FBgn0003091	Pkc53E
CFDlib00148	TGGCAAGTACATCCGTCGCG	TTGTGTGTTGAGTATCGTAT	FBgn0032187
CFDlib00149	CTTAACGGAGGCTGACTACA	TGCTGTTACATTTAAAACTC	FBgn0035957
CFDlib00150	CTGCGATCACTCGACACATA	GATGCTCGACAGCTGCGACT	FBgn0035421
CFDlib00151	CTTTCCTCTGAACAGTTCTG	TCTGCAGCTGCCCAGAATGT	FBgn0026063	KP78b
CFDlib00152	TCCGGTGAGAACTGCTGCAA	TCCACGAGATCCGCAAAATC	FBgn0032006	Pvr
CFDlib00153	TCCCTAGAAATCCTGAAACA	TACTGAGTAGCGCCCGCTCC	FBgn0035590	Prpk
CFDlib00154	AGATGTCCAACGGTCGTTAC	TCACGTAGTCCACATTGTGC	FBgn0033673
CFDlib00155	ACCCTTGGCAAGGGTCAAAC	TTGGGCGTGCATTGTGTGAT	FBgn0036544	sff
CFDlib00156	CGGCAGTACGGTAGGCCGTG	GAACTACAAATGTGCCTTGG	FBgn0026136	CkIIbeta2
CFDlib00157	CGAGGATGTACCAGAACCGG	TCCACGGGTGGCTCGTAACG	FBgn0004656	fs(1)h
CFDlib00158	CGCCCTAGACGATGATGTCA	ATTGGCGAAGGTGCGCCGTG	FBgn0004889	tws
CFDlib00159	GACCCAGTACTGGGTGGATA	TTTTCAGCTAATCCCAGGCG	FBgn0033423
CFDlib00160	GATCCGATCCTGAGATTCTC	GATCGAGTTTCCCGCCATCG	FBgn0015277	Pi3K59F
CFDlib00161	AGTCATCCATCGTGATTTGA	AAGAAGGTCTTCCACCTCGG	FBgn0035001	Slik
CFDlib00162	CTAACGTCTAACCGAGATGA	ATCCGTTAAGAACTCCATAT	FBgn0034240	MESR4
CFDlib00163	GGGAGCAGCGCCACTGGATT	GATCCCTCGAATCTTGCTTT	FBgn0032651	Oli
CFDlib00164	CACTTCACCATATCGCGACG	TGGTCCTGGATCGCCATGTA	FBgn0033748	vis
CFDlib00166	GTGGGCCAACGCCGTCGACG	TTGCTGACACTAGCTGACTC	FBgn0043002	Chrac-14
CFDlib00167	GACATGGTCATTCTCATGCC	TCAGAGCGATACCTGTATCA	FBgn0030505	NFAT
CFDlib00169	TCCTCCGCCGGAGATCTCGC	GGACCCGGTCCGGTGAGATA	FBgn0004893	bowl
CFDlib00170	CAACAACAATCACAGTCCCA	CGGCAGAGTTTGCCGCCGGC	FBgn0024184	unc-4
CFDlib00171	TTCATTTCCGCCCAGTCCCG	TGTCAAGCAATCGACAAGTC	FBgn0000567	Eip74EF
CFDlib00172	AAAGGTGCCAATATCGATCT	GCTCCCGTTGGCGGTGAATT	FBgn0003028	ovo
CFDlib00173	GGGGACAACTCTAATGTGCC	GTCAAAGGCCTTACAGCTGG	FBgn0000289	cg
CFDlib00174	GTCACCTGAAGAACGTTCAT	TGGTAGTAGAGCCAAGATCT	FBgn0040366
CFDlib00175	GGTTCGAGTTGGGACTCATC	GACCGCCGACGGATGCGGAT	FBgn0002941	slou
CFDlib00176	CATAACCTTCCTCAGCGAGA	ATGGCGCGCCACTTCTTCGA	FBgn0037475	Fer1
CFDlib00177	CAGGACGATCTCGGTCTGAT	AGCTTACCCCACAGACGTGC	FBgn0037446	Zif
CFDlib00178	TGTTGACATTTTATGTCCAT	ACATTCCGATCTGCATGGGA	FBgn0036274
CFDlib00179	GGCGGCAGCAATATAGATGG	GCGAACGGTGAACGGACGAA	FBgn0030082	HP1b
CFDlib00180	TATCAAGCCGGCAAGCAAGA	GACCCTGGAAGGACTTCGCC	FBgn0015299	Ssb-c31a
CFDlib00181	CGCTCCGCTTGTACCGCCAC	TGGACGCTGTGTGAAGTACA	FBgn0013799	Deaf1
CFDlib00182	CACACCGGGCAGTGCAGCTT	GTTTCTGTCCTTCTTGCGGA	FBgn0022720
CFDlib00184	AGCCCGATCACCAGCTACTG	GTTCCAGGCCCACACGCCGA	FBgn0005659	Ets98B
CFDlib00185	TCGAGCTCCCAAGAGCATTC	GAGGATGGAGACTTATCCGG	FBgn0050443	Opbp
CFDlib00186	GTGGCGGTAGCGGGAATTGC	AGCACCCCCTGCTGCGGCGT	FBgn0036285	toe
CFDlib00187	TCATGGGATACAAGCTTCAC	GGTGCTTGGCCATGCGGGAA	FBgn0039355
CFDlib00188	CACCATTACTAAACAGATAC	TGGAGGCGTGTTGGGCGACG	FBgn0014343	mirr
CFDlib00189	GCTGGCTTCTCCACGCTTCT	AGGGCGTGGCCAGCTTCAGA	FBgn0037931
CFDlib00190	AGAAGATCTTGCCGAGGAAG	TTGATTTGTCGGATGCTCCT	FBgn0037794
CFDlib00191	TACGCTGGATCGTCTGTGTG	AAAGACCAAGAAATCGGCCG	FBgn0036126	Irbp18
CFDlib00192	GTGATGCATCAACATGGCGG	ATGCGGCGACCTTCTGACCC	FBgn0005677	dac
CFDlib00193	TGGAGAATCAGCCGTGCCTG	CTTCCTGCGATCCCTGAAGC	FBgn0030432
CFDlib00194	GACTCGACAGCCCGCTTCTT	TGTTGAAGATTTACCACCGA	FBgn0000412	D1
CFDlib00195	CTGATTACGACTGTTGATTC	CCGGCGAGGCTCTCTTCTGC	FBgn0015721	ktub
CFDlib00196	ATGCTGAATATGGAAAGCGC	GAGGGGGAACTGCTCAATGG	FBgn0004862	bap
CFDlib00197	AAGTCAACTTCAGCCTTCAT	TTGTTTTCGTGATTGTCCGG	FBgn0035414
CFDlib00198	AACGTTCGGTGGTGGAGCTA	CTGAGCGGAACGGGCACTCC	FBgn0036423
CFDlib00199	CGGTGCGGCGGCACCCGTAC	TGTGATGAGATACGACGTCC	FBgn0000179	bi
CFDlib00200	GCTGCAGAATCCGCAGTTCC	TTGGGCTGACGCACTATCGC	FBgn0002941	slou
CFDlib00201	GGCCAGCGAGGAACTATTTG	AGAGCCTTTGGAAATCACCG	FBgn0034726	Mes4
CFDlib00202	TCTCGCGCTTGATCGACTCG	GGCCAAGGCTGCTAAGGCCA	FBgn0004362	HmgD
CFDlib00203	GCACAGCCTCAGCCTGAATG	TTGACGATCAACACGGGCTA	FBgn0039209	REPTOR
CFDlib00204	TACTCTGTCCGTTGGTCCTC	GCAAGCGCTTCTCAAGGCCC	FBgn0035144	Kah
CFDlib00205	GGCCCAAGACGATGTGCAAC	TGATGACTGGGGCCTTAGCA	FBgn0025635
CFDlib00206	CGGTACGCGGTCGCTTTTTG	GTGCAGGATGAAAGCGGTCG	FBgn0034520	lms
CFDlib00207	CGCTTCCAAGCTGCAGGCCT	ATTGCCGGGTCCCGCTTCTC	FBgn0001978	stc
CFDlib00208	TTCCTCGGCGCTGTTGTATT	CGTCGACAGTCGAGCATGAG	FBgn0001994	crp
CFDlib00209	GTGCAACGAGTTGCTCTGAA	ATTTCGGACTTGTTCTGGGC	FBgn0011763	Dp
CFDlib00210	ATTCCACGATGGTTATCCAC	CTGTACAGCGGGCGGTAGCA	FBgn0003118	pnt
CFDlib00211	GGCTATGGAAGAGTTAAGAT	CGCACCAGCTCTTCCAATGG	FBgn0035903
CFDlib00212	AGCGCAAGCAGCGGAGATAC	AGGGAGTTCGAGGATTGCGG	FBgn0023489	Pph13
CFDlib00213	GATTGGGTGCCTGTTGCGGC	CTGCAAGGGCGTGACGCTTA	FBgn0032295
CFDlib00214	CGCACTTCGGACGCATCTTG	GGTGATCTCAGGGGACTTGT	FBgn0024244	drm
CFDlib00215	CACCATGTACCCGGTAACCA	ATGTGTGAGCTCCGGCTCTT	FBgn0016917	Stat92E
CFDlib00216	CGCCGCATCCAACTAATAAC	TTCCACAAGTATCGCACTTG	FBgn0037617	nom
CFDlib00217	CCTGTCCACGGTGGACGACT	CTGGCCCAGCGCAGCCGGCG	FBgn0022699	D19B
CFDlib00218	GTTGTTCAGTACGGTGTGTA	CTACTTCCGCTTCCCGAGCA	FBgn0036134	FoxK
CFDlib00220	CTGGCCCCATGTGGCGTCCC	TGGAGCGTAAGCGCCGTGCC	FBgn0002733	E(spl)mbeta-HLH
CFDlib00221	AATGGTGGCGCTTCAAATAT	CTCCTGTTCACTACCCTCCC	FBgn0005558	ey
CFDlib00222	TCACTATCCCTGATACCAGA	CACACGCGGCTGCAGGTTGT	FBgn0030659
CFDlib00224	CGGCTGTGGTGAAGCCCTTT	AGATCTGTTCCAGAAGCTCA	FBgn0035691
CFDlib00225	CATACCGAGCACCATACGCG	CAGCGAGTACTGCTGGGTGG	FBgn0029822
CFDlib00226	CCACCTGCATCACAACTCGC	GAACCCAGGTGAGTTTGCAG	FBgn0042630	Sox21b
CFDlib00227	ACCGACTGGATTCAGATTCG	TCAGTAGCCACCTCGCAATT	FBgn0052105	Lmx1a
CFDlib00228	CGTGACCGCCAATACGGTTA	GGACGATTCGCGCAGAACTA	FBgn0037746
CFDlib00229	CACCGCCATGGCGTTCGGTG	GTTGAACGTTTGCCGGCCGC	FBgn0008646	E5
CFDlib00230	TGCTCCAGCTGCCGCGGGTC	AGAGCGCATCTCCGAGCTGA	FBgn0259176	bun
CFDlib00232	GTAGATGGAGTTGTACAGGT	TGCCCAATGCGACCAGGATG	FBgn0003129	Poxm
CFDlib00234	CATGAACGGCCCAAGTGAAT	CTTAGAATCTAGTTGACTAT	FBgn0037645
CFDlib00235	GCTGCTGGATTAGCAAACGT	TCTTGGACGTAACATTGTAC	FBgn0031799	Pez
CFDlib00236	CGCTGCGTATTCTGACCCAG	ACGGCTATTATATATCGTTC	FBgn0045980	niki
CFDlib00237	TATGGTCGAGACAAAGTCAA	TGCCGTATTCTCTAAGAAGT	FBgn0036161
CFDlib00238	TCGGCAGAAGTCGTCAGCAG	AATGCTGCCATCTCGAGGAT	FBgn0261984	Ire1
CFDlib00239	TGAAGGCCACAAAGTATAAT	TGCCTGAATGCTGTGCACAA	FBgn0031952	cdc14
CFDlib00240	TTGCTATCTCAGAGACAGCG	CTTCTGGAAAGTCTTATTTA	FBgn0052487
CFDlib00241	CCACAAATATAGCGACGCCG	CAAACACGACCGAGCCACTG	FBgn0036187	RIOK1
CFDlib00242	ATGTGGACAGCTTGATACAG	GGGCAAACAGGTCCAGATGA	FBgn0000711	flw
CFDlib00243	CCGTTTTCTAAGCCGTCGCA	GGGCAGCTTTTTGTACGAAC	FBgn0004049	yrt
CFDlib00245	GCTGGACGCACGCAACAACT	GTGGAGTTTCTAGTGGAGCG	FBgn0005536	Mbs
CFDlib00246	GACCAAACTGCGTGCCGCTT	ACAACAAAACGCGCGGCCTT	FBgn0000405	CycB
CFDlib00247	CATCATGTAAGCGATCACAG	TTGAGACTGAGACTGTTCCA	FBgn0031044	MKP-4
CFDlib00248	TGGTGCACCACCAGCGTCCT	ATATACAAGCTTACTGATTT	FBgn0086657	IKKepsilon
CFDlib00249	ATTGCACCCGCTCTCCAACC	GGGAATGGTATATTTCTTGG	FBgn0034644
CFDlib00250	TGCCACCAAAACGAGGTGCG	AGTCGGACGTGTGGTCACTG	FBgn0000826	png
CFDlib00251	CAAGATCGGTTAGGTAGTTG	TGGACAACGAGAAGTTGCGG	FBgn0016930	Dyrk2
CFDlib00252	CAGATCATCCAGATCGCACT	TATCCGAGAGGCTGCAGCGG	FBgn0032811
CFDlib00253	TGGCTTGCAACAACCAGGAC	AGTAATACGCTGTGCGGCGA	FBgn0034691	Synj
CFDlib00254	TGCTTAAGGGGGGCGGCACT	GTCTTTCCAAGTCCAAACGA	FBgn0000063	Mps1
CFDlib00255	CAGGTGCTCTCCCCCACAGT	TCCGTAATATCAGCATTTAA	FBgn0004373	fwd
CFDlib00257	TTCCGGCGGTGTCTCATACT	TGCCCGAGCTGATACGGGAG	FBgn0015279	Pi3K92E
CFDlib00258	CCATCGCGTTGCGACGTATC	TGGACATCAATCGCACCGAG	FBgn0024846	p38b
CFDlib00259	CAGCCTGACGCCAAACCACA	AGTATTCGGCCAGGATATCG	FBgn0027506	EDTP
CFDlib00260	CGACCACTTCCTGTTCAAGG	GAGAACAGCGGCATCAACCA	FBgn0000116	Argk
CFDlib00261	CTCCCCCATTGAGTTCGTAA	CGGCTTTTGTTTCACGTCCG	FBgn0011300	babo
CFDlib00263	AGCCTCGGAACACGGATTCG	TGGCGCAGGTTTTCAAAGCC	FBgn0036142
CFDlib00264	CTCGCCACATTGCTCTGGCA	CCAAGGACGTGCAGGCTCTG	FBgn0000442	Pkg21D
CFDlib00265	TCATGGAGTACGTGAGCGGC	TAGTGCCCAATCTTGACCAG	FBgn0023169	AMPKalpha
CFDlib00266	AGCGCCACGCCCCACTCTAC	GTTGGGAATCCGGGCCTGCA	FBgn0259168	mnb
CFDlib00267	CCAGAAGCAATCGAAGGTGT	CCAGATAGTAGTAGGCCGCA	FBgn0004369	Ptp99A
CFDlib00268	GCTAGCGTCGCTGCTCCTGC	GAGCAAGTGCATCTGTCCTT	FBgn0030245
CFDlib00269	GACTGCCAGCAGCAACTCTC	GGCGGTATATGAACCGCTGG	FBgn0025742	mtm
CFDlib00270	CCAAAGGCGCCGCGGCTGAT	GAATCACTCCCAGAATGCCA	FBgn0260399	gwl
CFDlib00271	TAGCGTCCTGGAAAACAACT	CGATGGAATCCTCAGCAGAG	FBgn0000028	acj6
CFDlib00272	AGATGAGCCTCATCCGCAAG	CCGGGTCAACTTCAACGAGA	FBgn0032297
CFDlib00273	CAGCTGAAACGAACCTTTCT	GGTCCGGAACTCCGGCAAGT	FBgn0038463
CFDlib00274	CTCGCCGATTCGGTAACTCA	TCTCATAGCACACCAATGCT	FBgn0036552
CFDlib00275	CTTTCCCACAGGCTCCACTG	GGAGCATCGGGGATCACAGA	FBgn0034137
CFDlib00277	CAGTTAGATTCCGATCCGTG	CTGGAGAAGCTGTTGATCGG	FBgn0032650
CFDlib00278	CAGCGATGACCGTTCACTCT	GGTTAGTAAACCGGCGGATG	FBgn0022029	l(2)k01209
CFDlib00279	GCAGGACGAGTACATCCGAG	TTTATAACGCTCGTGTACTT	FBgn0085386
CFDlib00280	GCTGCACGACCCATCGAATG	CGGTGCGTCCTCGCCGAATG	FBgn0035945
CFDlib00281	CGGTTCGACCACGGAATATT	TTGCTCTGCCCAGCGAGATC	FBgn0024179	wit
CFDlib00282	GAGCCGCGCGAAACCCATGT	AAGGTGGGACGCGGAACATA	FBgn0015618	Cdk8
CFDlib00284	TCTTTGTCAAGGCACATGTA	AGCAAGATAGCAGAAAGTCT	FBgn0027507
CFDlib00285	CAAGGGAAGCTTCTCAATGC	TAGATAGAGTGTGCCAACCG	FBgn0028497
CFDlib00286	GCGTGTGAACGCCACCAATA	AACGGAGCACGACAACAATT	FBgn0028427	Ilk
CFDlib00287	CTGTTGTGGCGACCACTGTC	CTGGGTCAAGCAGGCATCGC	FBgn0031995
CFDlib00288	CTGGCAGTTGCATCGCACGC	ATCCTGCGTTCCCGGGGGCG	FBgn0052484	Sk2
CFDlib00290	CATGTGACTGCAGCGGTAAA	TATGCCAGATTCGAAAGTAG	FBgn0260480
CFDlib00291	AGCTGGCGAGGCTTTGAGGG	GCTACGCGAAATGTCCCAGG	FBgn0021796	Tor
CFDlib00292	CAAGCTGGCAGACTTTGGAC	CCGCCCAAGTACAAGACGCG	FBgn0040298	Myt1
CFDlib00294	TGCCGGCATCAGCGGTAGCA	GCTGCGTGTCCGTCCAGTAG	FBgn0027497	Madm
CFDlib00296	CAAACCGGAGAACATAATGA	ATGAGAATGTAGTCCACCTT	FBgn0039796
CFDlib00297	GACTACGATCCCAACTCACT	TATCCGAGCCAGCACATTAA	FBgn0035039	Adck
CFDlib00298	CGCCACCGAACTGATCATGT	CTACGACATCAGTTTAGACC	FBgn0038744
CFDlib00299	TTGGCATAGACGTTTTTCAG	GAGCGGTTCCGTATTGAGTT	FBgn0023129	aay
CFDlib00300	TGGCCCTAACTAATCGGGAT	TTTGCCAGCGCCCGGCCGCC	FBgn0030556	mRNA-cap
CFDlib00301	CGGGCGGCGTGTGGGTGACC	GGCGCCCAACAAGGCACGAG	FBgn0036028
CFDlib00302	TCAACGAATGGGCTCAGGAA	TCAGCAGGTACATTATGCAG	FBgn0031463	G6P
CFDlib00303	TCAGCGCTGTCACCGTCGTG	TCCATCACATCAAGCAAGTG	FBgn0040394
CFDlib00304	GTAGCCCAAGATGTGCAAAC	AGCTCCGTTGACCTCGCTAG	FBgn0037218	aux
CFDlib00305	CAGCGACCACACACTGGACA	GAAGAAGGACACGCTATCCG	FBgn0003744	trc
CFDlib00306	TTGGACGGAGAATGCCGTGC	GATAGGTGGGCTTACAGGCC	FBgn0261549	rdgA
CFDlib00307	ACGGTGTGGTCTACAAGTGC	CTCCGGCGCCCGGTACCATC	FBgn0031730
CFDlib00308	TGATCCAGTCCAGGAAGAAC	TAATCGTAAGATCGGCATAG	FBgn0050103
CFDlib00309	CACTGATCATCACAGGATTC	TCTCTTGCGCAGGACTATGG	FBgn0010316	dap
CFDlib00310	CCTGTCGCAACTGGAAATTG	GGACACGTTGAGCGAGGCAG	FBgn0023508	Ocrl
CFDlib00311	CAACTACAACGAGGCGCCCG	TGGAGTCCAGGGATCGCAAC	FBgn0036844	Mkp3
CFDlib00313	TTTCGCGTGGCACTAGAATC	CAATCTCAGCGGTGGAAGTC	FBgn0028741	fab1
CFDlib00315	TGCGGGCCTCTGATGCAGGA	CCTGGTTCCCGTGGCATTCG	FBgn0036551
CFDlib00316	AACCAGGGTCAAAAATGAAA	GACCATGAAGTCCTCGTTGC	FBgn0030208	PPP4R2r
CFDlib00317	CTCCGTTTTCAGCGTGCTCA	ACGGATAGAGCACTGTAAGA	FBgn0003169	put
CFDlib00318	CTGCGGACAATACCGGAACA	GTACGTGTATTTATCCGAGG	FBgn0267350	PI4KIIIalpha
CFDlib00319	CTGCCGCTCGGCGATGATTT	TGCGACCGTTGAAAATGGGC	FBgn0045980	niki
CFDlib00320	CGCCTCGGATTGGGTGCGTC	CGCAGGAACGCAGCTCAGTC	FBgn0013751	Awh
CFDlib00321	CACCACCTGGGGCTCTACCA	GCATACATGACCAGCTCGTC	FBgn0039225	Ets96B
CFDlib00322	GGACTGTACTACAAGTTGCA	TCCGGCGCTTGCGGCACTAC	FBgn0003117	pnr
CFDlib00323	ATCGATTTGCTCGTCGTTCA	CGCTTCTTATGCGCTTCGTA	FBgn0035902
CFDlib00324	TTCCGTAAACTTCGGTCTGT	CTATGAGCATTTTTCCGAGG	FBgn0033358	spab
CFDlib00325	GTGGACACCATGGATGCGCA	CTTGCGGTAATGCTGAGTCT	FBgn0002734	E(spl)mdelta-HLH
CFDlib00326	CATTTTGGAATCGTTCAGTT	GGCCCCCAGTTTGCGGCAGT	FBgn0036274
CFDlib00327	AGGGATTATACGGATGCGAC	GTGCTGGTGGATCGTGCCCC	FBgn0000061	al
CFDlib00328	GTTTGCAGATGGCGTCGTAT	GTTGGGAATCGTGCTCTAGC	FBgn0005561	sv
CFDlib00329	GGCAATGTTTCGGGCGGAGG	CAGGAGGACGGTGTACATGG	FBgn0011723	byn
CFDlib00330	GGCTAAACGATGAACTTCAG	CATGGGATTCGGATCGTGCG	FBgn0042650
CFDlib00331	GACGAGCGGTACGGTAGCAA	GCGCCGCAGCTTTGACTCAG	FBgn0037051
CFDlib00333	ACAGGAGGCCTGCGAGAGCT	TTACCCAGAGGAGTGCTCAG	FBgn0032730
CFDlib00334	GCAGATTCCGCAGCTAATAA	TCGGGGTAGTCTCCTCGGCC	FBgn0050443	Opbp
CFDlib00335	TGGGCGAGTTCTGTTTGTCG	CGGCAGCTACCGCATTGGCA	FBgn0039946	ATbp
CFDlib00336	GCTGTACTGGGACCTCAAGA	TACTTTGTTTGCGGGTACTA	FBgn0000370	crc
CFDlib00337	ATTTGCGCGAAACTGCGTTG	TCGCAGCCCCACAGTCCGAT	FBgn0004914	Hnf4
CFDlib00338	TCCTCCAAAAGAAAACCCCA	CTTCTTCTGGGATCTTCTCC	FBgn0000137	ase
CFDlib00339	TCCAGCACTCCATGCGACCG	CCTCGTCCGCCTGCATCACT	FBgn0032130
CFDlib00340	TACTTTTACCTACAAAACGG	GTTACGCGGTCTGGCACAGC	FBgn0020306	dom
CFDlib00341	CGCCGCGTTGACGCTCCTCC	TCAGCCGAAAGCTGGCGTCC	FBgn0003964	usp
CFDlib00342	GCAGGACATAACTTAAGGGC	TGTACTTGCAGACGTTGATC	FBgn0039831
CFDlib00343	TACTCCGCGCTGTCGCCCGG	TGTAGAACATCTGACCCTCG	FBgn0034057
CFDlib00344	CAGCGCAACAGTCGTTACCA	GATGCACTACAGCTGGTGTT	FBgn0038316
CFDlib00345	CTCCTCCGCCTCGGCCAGCC	GTCGCGAATCCAAGGCCGGA	FBgn0020307	dve
CFDlib00346	GGTGTTCGAAAACTGTTGCC	TTGCGGCTTGCATAGCAGCC	FBgn0027339	jim
CFDlib00347	CGTTGGGGAGTCCTCTCGTT	CTGAACGGGGGCGGGGCGCA	FBgn0008636	hbn
CFDlib00348	TGCTCACAGGCTGCGGAAAG	AGCCCATGTGCCCAACACAG	FBgn0033459
CFDlib00349	ACTGTCTGTTCGGGAAATTT	AGCACCGAGTGTCGGATCTG	FBgn0038551	Odj
CFDlib00350	GAGCTCAAACCACCGTCCTC	GGAGACGTATTCGGTGGTCG	FBgn0034599	hng1
CFDlib00351	CACGATTCCTCTGAGTTTGG	ACTGATACCGTTAGTGGTGT	FBgn0050011	gem
CFDlib00352	TAGAAGATCTCGCCGCATTT	TGTGGGCAGTTGTAGTCCTT	FBgn0030010
CFDlib00353	AAATCCGCAAGACTATCAAC	GGACGTAGTCGACGTTGGCG	FBgn0030010
CFDlib00354	TGAATCAGGAGCTCCAGCGC	ATAGTAGCTTCAGCATCGAC	FBgn0037540	Pbp95
CFDlib00355	TCATGGTTTCGGAGGAGAAC	GTGGGCGTGACCGTGGATGC	FBgn0000504	dsx
CFDlib00356	GATTGCCAGCGAAATGTTCG	CTTGTGCATGCGCTTGAGTG	FBgn0004510	Ets97D
CFDlib00357	GCGATAGATTTCCAGCATGA	GAATCGCGAGACTGACATCG	FBgn0028979	tio
CFDlib00359	GCGACGACGCGACGGACTCG	CAGCGTGTTCGACACGTTGC	FBgn0005630
CFDlib00360	ATTGAGAACTTCTGTAGTTA	TGCGAACGCATCAGGAGGCA	FBgn0038047
CFDlib00361	CATCTCGCCGCAGATATGGC	TTGCGGCAAGGAGAAGTCCG	FBgn0003511	Sry-beta
CFDlib00362	GGCGTCATTTGCTTCATCAG	CGCCCTCGCCGGGTCACCAG	FBgn0035160	hng3
CFDlib00363	CTGGGTCGCAATGGCGCGCA	TTCGCAACTGTCGCGAGCGA	FBgn0030432
CFDlib00364	CGCCTGCCCCATGTTACACC	CATCATTGCGGTCTTTCTCC	FBgn0034729
CFDlib00365	CACCGAGAGCAGTTTGTTCC	ACGACGTCGGCATCGGCAGC	FBgn0014859	Hr38
CFDlib00366	ACCAATGGAGACTTGTGAAG	TACCAAGCGCTGTATGAGTT	FBgn0038390	Rbf2
CFDlib00367	ATACCTGAAATTTCAAGCCC	GGGGCTATCCGCTGGCGTCC	FBgn0034667	comr
CFDlib00368	CGGGTGGCTTTATTGCGGGA	CGGTGTCTGTATCTGGGCCA	FBgn0028999	nerfin-1
CFDlib00369	GGCTCTTCCTTCATGACTTG	ACCACGCTGTGCCGCACCTG	FBgn0038548
CFDlib00370	TTCTCGTACGTTGGGGACTC	GCAGCACGAAAGCTGCCTTC	FBgn0039938	Sox102F
CFDlib00371	TCGGGAGACTAGTCTATTCG	GGTCGCTTACTGGCCGCTGG	FBgn0041111	lilli
CFDlib00372	ACTTCCGTCCATGTGCTCGA	TAATGATAATCAGCACTGCG	FBgn0035405
CFDlib00373	GGAGGTAGAATTCGACGAGA	GTAATTACACTGGTAGGGCT	FBgn0033934
CFDlib00374	GGCAGTTCGCCATTGACCAG	GAACATGCGCCTGTTCTCTG	FBgn0038108
CFDlib00375	AAGTCGCCGATTATCGGAGC	GAGCGTCCGGTGATGGTACA	FBgn0030009
CFDlib00376	GGATCAGGTGCTCAGCCGCG	GCCTTCAATGGTGGAGCGTT	FBgn0032473
CFDlib00377	CCGTCTACGCCACCAAGCGA	GGAGCGCCTCAACGCCGAGC	FBgn0003513	ss
CFDlib00378	CTTTTGTTGAGCCATGGCGG	GTCCGGTGTACAACTTCTTG	FBgn0032600	BuGZ
CFDlib00379	CTTCCGCTTCCCCAAGTGCC	GTGAAAGAGCAGGACACTGT	FBgn0037877
CFDlib00380	AATGCATGAGAATTCCACCA	CATGTGCTTGCTTAGATTCG	FBgn0038472
CFDlib00381	CAGCCATTCCAGTCGGTCAT	GGGCCACTCATCCACGATAA	FBgn0035405
CFDlib00382	CCTTCAGCAGAGCTGCCGTA	TCTGCCGCAGGGTATACAAC	FBgn0021872	Xbp1
CFDlib00383	CAAAAAATCCGAGGGAGAGG	TGCTGCTCGCCGAGATCGCT	FBgn0010323	Gsc
CFDlib00385	GCCATAGATCGAGCTGGCCT	GCAGGATTCTATTACTCAGC	FBgn0030659
CFDlib00386	GTGGGGGCGTTCGAGGGCGG	GTCCGGCCTGAGTCTGCAGT	FBgn0011655	Med
CFDlib00387	TGCGGAATCAAATACCTGCT	GCTCCGGCGGATTGCGCATC	FBgn0051642
CFDlib00388	CACCGAGTTCACCCGCGAAG	TTGGCCCGTTGGCGCTTTGA	FBgn0085451	htk
CFDlib00389	GATCACGCAGCTTCTTCCAG	CTTCTGGGAGATGGCCTTCC	FBgn0032858
CFDlib00390	GCTATCTTACGTTGACGCAG	ACCAGGACGTGCAGAGTGTG	FBgn0039329
CFDlib00391	GTCTGGGCAGCCAACAGCCG	TGAGCAAGAACCTCCTGGCA	FBgn0086908	egg
CFDlib00392	CCGGTGGCGGATGTCAGACT	ACAGTATCGCGATGGTCCAC	FBgn0039201
CFDlib00393	ACGATGATCAGAAAGCGGAA	TCATCTGAAGGCCCACCAGA	FBgn0043364	cbt
CFDlib00394	ACATACTGCCCAGCATCGAC	CCGCCAGCGGCAGGGCTCCG	FBgn0030963
CFDlib00395	GACACATCACATTTTCATCA	ATGGCAACCATTGTTGCTAG	FBgn0033015	d4
CFDlib00396	GGACACGCCGTAGTGCTTCC	TTTGCGAGGCCCACCAGCTA	FBgn0037436	Hr83
CFDlib00397	GTCCGAGTACTCGGAGAACG	TACCAGGCTCACTTGGAGCT	FBgn0002914	Myb
CFDlib00399	TCGCACACCGTTGTAGACGA	GATGCTCGTCGTCTCGTCGG	FBgn0264357	SNF4Agamma
CFDlib00400	GCAGTCGTGCACCAATCTCC	GATGAACCAGTTGAAGGGTA	FBgn0036760
CFDlib00401	TCCGATCACAGTGTTTCTCT	TCTACAACGCTGGTCACCTC	FBgn0261456	hpo
CFDlib00402	AGTCGATCGTGGACGCAGTG	TCTTAATTCCAATCATGTTG	FBgn0037632	CCT7
CFDlib00403	CTGGCACTCGGAGTGACGAT	CTGCGATTGTGGAAAAGTCG	FBgn0032187
CFDlib00404	TGCACCATAAACTCAGGCTG	GGCCCAAGCACATGGCCACG	FBgn0046685	Wsck
CFDlib00405	AAAAGTTCCCTCGCCCAGTG	GATGGAGAATGTCTCCGGTG	FBgn0265998	Doa
CFDlib00406	CAGCAGCATAACGCCCGACA	AGGAGAACTGGCGGGTCTGG	FBgn0026061	Mipp1
CFDlib00407	CGGCGGGGCAACTAGTTCCG	TGCTTCTTGATGGGCTTGGT	FBgn0004049	yrt
CFDlib00408	CTCAACCAACGCCAATTTAC	GAGGATTCCCTCGCCGCCGG	FBgn0037120
CFDlib00409	TCGGTGCCATCCTCATCTTC	AGAGCAGCGCCAAAATCCCC	FBgn0033581
CFDlib00410	AGGTGGCCGGAGGAGCTGAT	GCTAAGTTCATCGCTTACCA	FBgn0003044	Pcl
CFDlib00411	TGTGATAGTGTCGCCGGTAA	CGGCAGCGGCGGGGGATCGT	FBgn0038592
CFDlib00412	GTAAACGTTGCATAATCTGC	CTCCTCCGGCCGGCACCCAC	FBgn0035954	Doc3
CFDlib00413	GGCAAACACAGATGCCGCTC	AACCTGCCGAATGCCGTGAT	FBgn0043002	Chrac-14
CFDlib00416	GATGTAGCTGTATGGCGGCT	GTTGTTATTGCTGGGCGGTG	FBgn0000659	fkh
CFDlib00417	CCCAAGGCTGATTCACCCTT	CGCCGTATCCATGGATTGGG	FBgn0026582	Hmg-2
CFDlib00418	TTGGATTGCCGATACGAGGC	GAACGATCTGGAGGCGCTGC	FBgn0013263	Trl
CFDlib00419	GGAGAAGTCAGCTAGAACCT	TCTGTCCCAGCAGGTCCGCT	FBgn0023094	cyc
CFDlib00420	TGCGCTCGATTGTGACGCTC	GCTTGCTATAGGCAGCGGCA	FBgn0027950	MBD-like
CFDlib00421	AGAGATTCATGCCCGCATGC	CCAGCCAGCGCAGGTCACTC	FBgn0051224
CFDlib00422	CACATTTGGCACCAAGCATA	TGTGTACTGAGAGAGTATCG	FBgn0031597
CFDlib00424	GAGCCGCATTCCTTTTGGAG	ATGACTTCACCGCTGACTTC	FBgn0037877
CFDlib00425	TGTGGAAGTGTTGGTATTGC	AATGGGAGGATTCACGGTCT	FBgn0029711	Usf
CFDlib00426	TGTGCTCAAGTGTTGATGAT	TGATAGCGAACGCAGTGGCG	FBgn0004394	pdm2
CFDlib00427	TCTGCTCCACTGGGTGCGCG	GACGCCCAGTAACCTCTTCG	FBgn0039860
CFDlib00428	CTGGAATCCGGAGAACGATG	CAGATCGCTGGCCTTTTGCA	FBgn0011774	Irbp
CFDlib00429	GTTGCTGCCGGAGTTCCCGG	TCGCTTCCACATTGCCGGTT	FBgn0027951	MTA1-like
CFDlib00430	AATTTCCATAAGGAGATCGA	TTGACCACTAATGCCGGTGG	FBgn0035769	CTCF
CFDlib00431	GGACAAGAATCCCGACCGAC	GGCCAATCGACTTAAGCAGG	FBgn0027599
CFDlib00432	AGGTTGTAGTTGGTCCTCAA	GATACTGTCATTATCATGGA	FBgn0039530	Tusp
CFDlib00433	AAACCTTTGCCTGCCTTGTC	GGCTCATCCGCGCGCAACAG	FBgn0011763	Dp
CFDlib00434	CCAGGAGATCGTTGTCACCG	AACATGAGTGCCTCCAAGGA	FBgn0003567	su(Hw)
CFDlib00435	ATCCAGTTCGCCTTCATCCT	TTCCTTGTGCCCCACTCATG	FBgn0035518
CFDlib00436	ATTCCGCTGCACATCCGCGC	GGGTATCTTGTCCCACTCAT	FBgn0030878
CFDlib00437	GCTTGACCATGCGATAGATT	CTGCAGGGCTGCGTGCGGAT	FBgn0010287	Trf
CFDlib00438	CATCGATCAGCTGCGTTCGC	CAGCAACGGCTCCTCGCCTG	FBgn0010768	sqz
CFDlib00439	CTGGGCTACCGCGGCCGCTG	GGCGATCTGCACCGGATAGG	FBgn0003300	run
CFDlib00440	AGGAAGAACCGATCCGAGAT	CTGGCGTCCACACTGGTCGC	FBgn0013751	Awh
CFDlib00441	CAAGCATCCAGTGGTTATGT	ATTCGCTGTATTCGCTCACC	FBgn0013263	Trl
CFDlib00442	GATGATAACAGGCACCGCCT	GCTGCACCGACTGTTTCTTG	FBgn0034650	NC2alpha
CFDlib00443	AGCTGCAGCTTATCACATTG	GGCCAAGTCGTAGAAATCTG	FBgn0003460	so
CFDlib00444	CAGATGCCAGGCCATTTTGA	AAATTGAGGACAACGGCGCA	FBgn0014018	Rel
CFDlib00446	ATACACTTACACACAGAACG	AAGGTTGCCGGCAGTTGCTC	FBgn0004878	cas
CFDlib00447	TGCGGCTCGTACTGATCTTT	GATCCCATTTTCGGGGAGTT	FBgn0011701	repo
CFDlib00448	GGGCGCGGTTTTACCGGATC	GCCTGGAGGATGCTGAGCAC	FBgn0030314
CFDlib00449	TTTATCGCCAGCCTGGAACT	GGCCAGATCGTCCGCGCTAT	FBgn0032815
CFDlib00450	GTCTTTTCGACGGGCTCATC	TGGTCCCGTGGAACTCAGGC	FBgn0038301
CFDlib00451	GCCGGCCAGACCGGGCTGAG	GCGATCGTGCTCTTCACCAC	FBgn0003651	svp
CFDlib00452	GGGTCTGCAACAGGGCCTGC	TCCGGGCGAGGTGATGCCGG	FBgn0052532
CFDlib00453	GCCACAATCCCGAAATGCGG	CCTCTATCTGGATGGCTCGT	FBgn0002023	Lim3
CFDlib00454	TGGCTGGCGATGGAGGCGTC	CGGGACGGGCAAACTGGGAC	FBgn0086655	jing
CFDlib00455	AAAATGCCGCCACACATCCT	TTCAGCGAGGCGGTAGTTGC	FBgn0086655	jing
CFDlib00456	GCAATCTCCGGCGCCATGTC	AGATAGCAACGACTTGGTTA	FBgn0020617	Rx
CFDlib00457	CGCTCACTCCGCGTAAACAG	CATTGTTGGCATCCTCAAAG	FBgn0001133	grau
CFDlib00458	AGCTGCAGCTGCCCCAACAG	ATCCACTCGAGCCCTTTGGG	FBgn0004858	elB
CFDlib00459	GGACAGGCGCTCGTCTACAA	TATTAAGATCTACTTGCGGT	FBgn0039370
CFDlib00460	CGTTGGTACGTGGATACGCC	CATGGATGAATCGCCGTCAC	FBgn0030680
CFDlib00461	TGCCTGATTCACCGCTGGAG	GTCACCGTAGCCAGCTCATG	FBgn0003053	peb
CFDlib00462	GCTGTCGCGGCTCTACTTGA	CTACAGTGGCCTTAAAACAT	FBgn0024251	bbx
CFDlib00463	TGGCCAGAAGTTGTCGATGG	GTTCGTGCCGCCATTGTTGG	FBgn0029905	Nf-YC
CFDlib00464	CAGGATGGGCTTGTTGCATC	TGGCCAGGGTATCGCGCCAT	FBgn0026411	Lim1
CFDlib00465	GGAGTGCATCGATACGGTCT	GGTTCACACCTGCCTGGCCA	FBgn0034096
CFDlib00466	TGCCGCCGCAGCCGCGTGGG	GCGGGAGTGTTACTGCTCGG	FBgn0000492	Dr
CFDlib00467	TGCGCAAGAACGAGAGGATG	ACTTTGACGTTTACGTTCGG	FBgn0003612	Su(var)2-10
CFDlib00468	TCGCCATGATGAACAACGTC	CTTCAGCACATGGTTCTCTT	FBgn0016076	vri
CFDlib00469	CGGTGTCATGTCCGTTAACA	GACAACCATCACATGCATCA	FBgn0020378	Sp1
CFDlib00471	GGCTTCAGGTTAACGAAACT	TTTCGCCTGTATGTGTCCTT	FBgn0040305	MTF-1
CFDlib00472	GTTCAGCCGGTGGTTGTCCA	TTGCGTAGCTGTCTGCGCCT	FBgn0029822
CFDlib00473	CAGTGCTAATTACCGTGCCG	GTTGGATTGGCTGATGCATC	FBgn0021872	Xbp1
CFDlib00474	AAGGTGCGCTACAGACGCGA	ACGCTGTGATGGAAAACTGT	FBgn0259234	Camta
CFDlib00475	AGTGTGTGGCGAGCCCACCG	TTTTGGCGCCTTCACCTGCG	FBgn0001320	kni
CFDlib00476	AGCCGTCGATTGAGGATCAA	AAGATGGATATCCTACCGAG	FBgn0040765	luna
CFDlib00477	AAGTAGAAGGACTCCCAGCT	ACATGGAAGATGTATGTCAC	FBgn0033815
CFDlib00479	CAAGACGGGATCTCCACATG	GGCCACCTGATTTTTCATCA	FBgn0259162	RunxB
CFDlib00480	ATCCGGATCCGGAGCAACGT	CATGTCGCCGCCGTCCCCCA	FBgn0024975
CFDlib00481	CGGCGAAATCGATCAGTTCG	TGCTGCCCCTCGCCGCTGGG	FBgn0025525	bab2
CFDlib00482	CTGGGTACACTTGACCAGGA	GGGCATGCTCTGCTGAATGA	FBgn0004606	zfh1
CFDlib00483	TTATACGGAATTGTGCCAGC	TTGACGGTGGTGTTCTTAAT	FBgn0259211	grh
CFDlib00484	GCAGCAGCTAAGCAATGCTT	CAGCGGTGCATTTACTTCGG	FBgn0261238	Alh
CFDlib00485	CTCGCCAGGATCGAGTGTCT	ATGGAGGAGCTTTCCATCGC	FBgn0085405
CFDlib00486	GGCAGATCTTGTCAAGCTCC	GCGGGAGCAGGCTGAAGTGT	FBgn0034643
CFDlib00487	GCCGGCAGATTTCCGGAGCA	ATCTCACCAATCGCACAACC	FBgn0034821
CFDlib00488	CCCGTTTCACGGACCATCTG	CATTGGTCGGAAGCATCGTG	FBgn0039201
CFDlib00489	CAGGAAAATAACAGACGTAC	GCTCTCGGTCAGTACTTCGA	FBgn0035213
CFDlib00490	CACGGCAACAACAAGGTCTT	TTTTCTGCGATAGGAATCGT	FBgn0004054	zen2
CFDlib00491	CTCAAGCCGGAACCCAACAG	GAGCTGCGTCCGAACCTGGT	FBgn0052532
CFDlib00492	GATCCGGGTCGGATACGATC	GAAGAACTGCGCGGTGTGCG	FBgn0015240	Hr96
CFDlib00493	AACAACACGACCAATACGAA	TTGTAGGTGGCTATGTGCGG	FBgn0083981	RunxA
CFDlib00495	CCTGGGCACGCCCCCCGTCA	CGGAGTATATGTTTGGCCGT	FBgn0030058
CFDlib00496	ATGGACGTAAGCAGCATGTA	ATAGGTGAGCTATTGCTGGG	FBgn0002522	lab
CFDlib00497	AGACAGCCGGCATGTTTACA	AGGCGCTGGCGCGTCGATTG	FBgn0039411	dysf
CFDlib00498	GGTAACAACATGCGACAGGG	CAACAACTATGGTGGACCCA	FBgn0004401	Pep
CFDlib00499	CGCAAGTTCGCCCGGAGTCA	AAAGGGATGGCAGCGCGACG	FBgn0027950	MBD-like
CFDlib00500	CAGTTCGTCCAACTGGGAAG	AGACGAATATTGTTGGGCAA	FBgn0003145	prd
CFDlib00501	GGACTGTTGAGCCGCCATCT	ATCGGATATCAGCATGACCC	FBgn0029173	fu2
CFDlib00502	CAATGGTTCCGTGTCGTCTA	GGCGCCTTCTGGTATCCAGA	FBgn0033846	mip120
CFDlib00503	CATTCGCCAGGTTCGCCAAT	TGTGGGTGGCGGCAAGCCTG	FBgn0000179	bi
CFDlib00504	CAGCACATCGCTCCAGATGC	CTGGGGAGGACTACTCGCCT	FBgn0000097	aop
CFDlib00505	CAAAAGTCGCCTGGCTTCCG	TGTCCCAGTCGATCGCCACC	FBgn0014179	gcm
CFDlib00506	TTGAGGGAGACGGCCATCTG	TATGACTAAGATGATTCCGC	FBgn0000576	ems
CFDlib00507	GCGACGCGATCTCATAAATG	TTGCTGCCGTCACCTTGTCT	FBgn0039411	dysf
CFDlib00508	GCGGCATACACGGAGGAATT	CGTGGAGCGTCCACCGACCG	FBgn0043001	Chrac-16
CFDlib00509	ATCGAACTCACTTTGAGAAC	CTTCAAACGTCCGTAGGCGC	FBgn0022740	HLH54F
CFDlib00510	TACCGGCACCTCCACGCAGT	CCGTCATCGCTCGCGATCGT	FBgn0032388
CFDlib00511	GCGAGTAGTGCTTGCTGGTG	TCAGCAGGCGAATCCAGGGC	FBgn0039509	bigmax
CFDlib00512	TCGGCCTGCTCCATGGCAGG	CTTTGGTGTGGGCATCATGA	FBgn0000576	ems
CFDlib00513	ACACTCGCAGCTCGTCGAGC	GTCACCACCAAAGGCCATCG	FBgn0052296	Mrtf
CFDlib00515	AGCGCTCGAGCCTTGATGTG	GCTGAACAATCCAATGCCTC	FBgn0083970
CFDlib00516	CACGATAAACTCCTCGTAAA	CTCCATTGCAGTTTTCTGGG	FBgn0263968	nonC
CFDlib00517	TCACTATCGTCGCCCCAAAA	TACCAACCAGTCATCCGGAT	FBgn0028360	Cdc7
CFDlib00518	GAGCTGCGCATCCAAAGCTG	AGGTATCCCTGGAACTGGTC	FBgn0036552
CFDlib00519	TACCCACAACATCACCGCCC	TTTTTCGTGGGAAGCAATCA	FBgn0003733	tor
CFDlib00520	GCAGGATCAAGACGAGCCCC	TAAAACGCCGCTCATGTCAG	FBgn0033322
CFDlib00521	GCGCTAAGGTGAAGCACGGC	TGGAGCCTTGGCCCCTGGAG	FBgn0004784	inaC
CFDlib00523	TGGCGCAGGGCGTCGAAGTT	ACCAGGGAGCGCATGGTCGA	FBgn0010015	CanA1
CFDlib00524	GATGTCCCTGCTCAAGTTCT	TGACTTCTACGGTGCTCCAA	FBgn0032147	IP3K1
CFDlib00525	AGCTGGCGACTTGACAATGC	CGGGGAGCGGGGTCCTCGTT	FBgn0050295	Ipk1
CFDlib00526	TAAGACCACCAGCCCGAGCT	ACACCTTCGAGGACAACATG	FBgn0052484	Sk2
CFDlib00527	CGAACGGTATGCAGTTGTGG	TATCGGTCTACGGGAGTTGC	FBgn0261549	rdgA
CFDlib00528	CCTACTCGGACAATGACTCA	CGGATTCGTCCCTGCAAACG	FBgn0036396
CFDlib00529	AACGTTTCCGCAGTTGGACA	GGCCGCAAATCCCTATCGAC	FBgn0030664
CFDlib00530	TGCACCACCGCCTCTGCCGT	GGCGCCTACTCCGGCATTGG	FBgn0035993	Nf-YA
CFDlib00531	AGCAGCAGTCCGGGGCCAGC	ACTTGCTGACAACGATGCCG	FBgn0003507	srp
CFDlib00532	TGGTGATGCAGATGCGACAT	AAACGACACCTTACCGCAAC	FBgn0029895
CFDlib00533	GTGGGTCGGCGGGCTGAGTT	TGCTGCGCGACGATGCCGAA	FBgn0261238	Alh
CFDlib00534	AGAAGCGCAATCATCGCATT	GGCTTTCGGACGTGCTCCCG	FBgn0038551	Odj
CFDlib00535	CGCCCTACCCCTGCAGCTTC	CCACCACCAGTGGTTTTCCC	FBgn0003683	term
CFDlib00536	GTAGATGGGAGTGCACATGC	CACCATCCGTACGTCATGTT	FBgn0000459	disco
CFDlib00537	GGTTTGCCTGCAGCAGCCCA	TGTGCACGTGAAGAACGAGC	FBgn0038768
CFDlib00538	TAGGTGCGCTTTCTTCCCGC	GTTGATGTCGTTTTGCCGGA	FBgn0035357	MEP-1
CFDlib00539	TCGCGTATTGTTCACTTTAT	TTGGCCACATTGGGAGCCAC	FBgn0003396	shn
CFDlib00540	CGCAGTCGTCCCGACACCTG	GGCTCCAAGCAGCAGTGCGG	FBgn0022720
CFDlib00541	AAATGCCGAATCGTAATTGC	TTAACGGAGGTAAAGACTGT	FBgn0039860
CFDlib00542	CGGGACAGGCGAAAGGCGGC	GTGGCGGGGCGTCGGACACT	FBgn0033155	Br140
CFDlib00543	ACAGCATGTAGGCGGAGAGT	ACCACCGCGCTTGGCCACCT	FBgn0004362	HmgD
CFDlib00544	ATCTTGTTCGGCATGGTCGA	CATGGAATACTTCACGCGCT	FBgn0029867
CFDlib00546	GGCTGCGGGCGAGATTCGCT	TCTGCCGGAAGGTTACTCCA	FBgn0031495	GABPI
CFDlib00547	GTCATCCTCACTTGGCTTGC	TTCTTCCTGCGGATTCGACA	FBgn0028926	NC2beta
CFDlib00548	AGCCCACAAACTTATATTGG	TTGAGGCAGAACTGCTGCTG	FBgn0086758	chinmo
CFDlib00549	ATATACATGTGGGTCATCCA	CCCAATGCCCAGCCGGATGG	FBgn0034729
CFDlib00550	AGGACTCCATCGAACCCTGC	ACTGTTCTGTAATGGCACTC	FBgn0260243	E(var)3-9
CFDlib00551	GACCAATCATCCATACTACC	CTCCAAAGTCCCCATCCCGT	FBgn0004567	slp2
CFDlib00552	CCTCTGGAGCTTTTGATGAG	CCTTTATGAAGCAGTCGTTC	FBgn0004896	fd59A
CFDlib00553	TAGAGGCGTCATAGAGACTG	AACATGATATTCCCTCGTAC	FBgn0050431
CFDlib00554	ACCATACAGCGCACCCTCGA	ACGGCGCCGTACATGTGGGC	FBgn0011655	Med
CFDlib00555	CTCAACTTCGGGCAGTGATC	AGCTCCTCAGATCCAGCGAA	FBgn0002723	Met
CFDlib00556	ACGGAAGAGAAGCATGCGGA	AGAACCACGTAGGCGCCGAG	FBgn0034425
CFDlib00557	TGAGCCTCCACGAATTCCTG	GGCCTCGGCCTCGTAGTTCC	FBgn0030933
CFDlib00558	GTTTGACAAGCACTTTCTGT	AGGAGGGGATTCCTCGCTGG	FBgn0034814
CFDlib00559	CTGGTCCTTGTGATCGAATT	TGGGGACCACTTCTTGCACT	FBgn0011274	Dif
CFDlib00560	TTGACACTGGGCGTTGAGAT	AGTGGCGACCCAGGGTGCTC	FBgn0037031
CFDlib00561	CATGAAGGGCACGGGACTCT	TCCTCCTCCGCCTTGAGAGC	FBgn0003964	usp
CFDlib00562	GGGGTGTGGAACCATGCCAT	AGCGAACAGTTGAACGGATC	FBgn0024250	brk
CFDlib00564	ATTTCGCAGCAGTTGGGATC	TTTGTGCGGATTATTGTCGT	FBgn0000529	bsh
CFDlib00565	TGCAGGGTCATCTCCACGCC	CATGATCACCATGAACGAGC	FBgn0035956	Doc2
CFDlib00566	ACCCACATCGACGGGCCCAG	TCATGGCGGCGCGCGATTCC	FBgn0052105	Lmx1a
CFDlib00567	CACTGCTTTTGAGCAGGCCT	TATCTGACGGATGCGGGAGG	FBgn0036900
CFDlib00568	CGAGGGCAAGAGAATGAAAG	GCAAGTGGTCACCAAGGTAG	FBgn0005642	wdn
CFDlib00569	GTGCTGAGCCGGCTCAATGA	CATCGCGGACATGGCGTGGT	FBgn0003002	opa
CFDlib00570	CCTGGCCGGGAAATCCTACA	GGCGGAATAACACCTACCGA	FBgn0250732	gfzf
CFDlib00571	TCGATTTGGAGTGCTACATC	TTGGACAAGCAACTGGGCGC	FBgn0036522
CFDlib00572	CAAGTCGCATCTCATGATAG	TACCGCCGGTGCCGCTTGAA	FBgn0259176	bun
CFDlib00573	CATCTCCGAAACGATCGCTC	ATTTGTAGGGTAATGGGGCT	FBgn0000577	en
CFDlib00574	GGTCGTCTGGCGTCAACTGC	GATACAGTAGGCACAAGATG	FBgn0037751	topi
CFDlib00575	CTTTGCACTCGATACGCTCG	TCGCGGCGCTTGTCTCCGGA	FBgn0028531
CFDlib00576	CTATGAAGATCGTTAAAAAC	CGAACTGGTGGATCCGCTTG	FBgn0028387	chm
CFDlib00577	GTTGTGCTGATTGAGTAAAC	GACGGATCCTTCGGTGCCCA	FBgn0037698
CFDlib00578	TGCTGCGACAGCCGATCCTG	GACGGTAGCCACTGCGTCAG	FBgn0026575	hang
CFDlib00579	AATGATCTCGCCGGAACAAG	GCATTCTACCCGAGATGATC	FBgn0033748	vis
CFDlib00580	GTTCGAGCGGATAGAATGCG	CGCCGGAGCTGCCGTTTAGC	FBgn0001078	ftz-f1
CFDlib00581	GAAACGCGCAAATGCCTATG	AAATGACTGCTACGTGGAGA	FBgn0025185	az2
CFDlib00582	GGTCGCGGCAGCCGTAAACG	AGCCACACAGGTTCTGGGCT	FBgn0000541	E(bx)
CFDlib00583	GCGCCGTAAAATCCAAAACA	TGTGAAGAGGCCCCCACGGA	FBgn0039816
CFDlib00584	TGTGCGACACAGAGTGTGTG	TTAACGCTGCAGTAGAAGTG	FBgn0260789	mxc
CFDlib00587	GATCTCGCCGGAACAAGAAG	TGCCCGTCGCCGCATTCTAC	FBgn0033749	achi
CFDlib00589	GCATCCGCCAGGCGTCCTGG	CCTTTTATATCACCGCTGCC	FBgn0030058
CFDlib00590	CCTGCGATGGCATAACCATC	GCTGGACCAATCCCATCTGA	FBgn0052121
CFDlib00591	GCAGGGGAGGCTCCTTCTTG	TAGGTGGCGTGCACGGGCTG	FBgn0005638	slbo
CFDlib00592	GCGGTCAGCAGCAGTACGGC	CGAACAGGAGTTCTCGTACA	FBgn0005658	Ets65A
CFDlib00593	GGAACTGGAGCTGTCCACGT	GTGGAGCAGAGCGGTGGCGC	FBgn0000567	Eip74EF
CFDlib00594	AGTCCCGTGGCGGTAACAGC	GAAGTTCGACATGTAGAAGC	FBgn0038852	HHEX
CFDlib00595	GCGGCACTTGTGTGATGCGG	TTTGGTCACGGGGCCAGCGG	FBgn0029123	SoxN
CFDlib00596	GACTCTCGCCCAGGTGAAAA	GCTGGAGAGCACCCGGATGG	FBgn0005658	Ets65A
CFDlib00597	CGGAGGACTGGGCACAGGCA	GGGGTGATCGTGGGTGCCCT	FBgn0014179	gcm
CFDlib00598	TGTCTTCCATGACGAGATTG	GGCAGCACATGCGAGTCCGG	FBgn0038768
CFDlib00599	TTCACCTTGATGGGCTTTTG	TTGCTATCTCCTCGTCGCAA	FBgn0030933
CFDlib00600	GGGGATCCCATGGGCATTGC	GCCTCCCCGTCCACGGCTCC	FBgn0003651	svp
CFDlib00601	AGGTTGAGTACTACATCAAG	GTGCATGGTGCTGCGGCGCC	FBgn0039019	HP1c
CFDlib00602	TGTGCTGTGCTTGTACTGTG	TCCGCTCCAACCGTCCCCGT	FBgn0000413
CFDlib00603	CACAATGGCCGAATTCTCAG	TTTGGGATCATCCGGTGGCC	FBgn0030082	HP1b
CFDlib00604	ACAAGGAACACCCGTGCCTT	CGGCCTTATTTGTGTGAGCA	FBgn0033186
CFDlib00605	AAGGCGGCGCGATCACATCA	CACTTTCGATGTCTATGTCG	FBgn0017578	Max
CFDlib00606	CGTGATCTATGGCTTGCACA	GAGAAGCTCCCGCAGGCGGG	FBgn0023215	Mnt
CFDlib00607	TGTGGTCAGGGGCTCTAACT	CAAATGATCCCGCCGGCTAA	FBgn0030240
CFDlib00608	ATTTACACCTGTAAGGCCAC	CGCAGCGGCCGCCCATCATG	FBgn0015381	dsf
CFDlib00609	CGTTCAACTGATCCTCCAAC	ATTCAGTTCGCCCTCAACTC	FBgn0003963	ush
CFDlib00610	CCGTGGGTAAATAATTGCGT	GACCAGCACAACCGATGTTG	FBgn0034057
CFDlib00611	TGAGGCCAGCTTGAGTCCTG	TCCAACCACCACTCGCGACA	FBgn0000529	bsh
CFDlib00612	CCTTTGAGACATAAGATGCT	CCACGTATCTGTCGCCGGCT	FBgn0038833
CFDlib00613	CCGCTATTGGTTCTTGGTGG	TTTCCACCCGGTGGCGATGT	FBgn0035643
CFDlib00614	CAGGTGCGGCACACGTCCGA	TTAACCGGCGATGGTTCAGA	FBgn0028647
CFDlib00615	GTTGACCAACAACGAGCTAA	ATTTGGAGAGTCGCCGATCG	FBgn0003270	amos
CFDlib00616	CGATTGCACGCTAGCCGCCG	CATTCTCCATGCTGCGACGT	FBgn0005630
CFDlib00617	CTGCTGATGAGTCCGTGCTG	GCCGATAGCTGTGTGATGAA	FBgn0037645
CFDlib00619	GTAGTCACACGGCGTGCACG	TCGTCAGTGTTTCCGTTCTC	FBgn0038741
CFDlib00620	ACCATCGACCACTTCACGTT	GAGGCGGCGTTGGGCGACGC	FBgn0035643
CFDlib00621	AGCTAGCGAAGGGGTCGTCG	GCTGATGGTTTACTCTGTTT	FBgn0035357	MEP-1
CFDlib00622	ACACCGCCGCGTCCCATCGC	GCGATCGCCAGCCTGACAGA	FBgn0033782	sug
CFDlib00623	CAGGTGCTTCAGGTGCCTGA	AAGGTCCCGCTGACCAATGG	FBgn0259938	cwo
CFDlib00624	GGTTGCGGTTCTGGTTACCA	ACTAGCGTATGGAGACTCCT	FBgn0004401	Pep
CFDlib00625	CGACGGGACCTCCCGAAGAG	CGATGGTAACATGGCAGCTG	FBgn0025776	ind
CFDlib00626	ACCTTTCGCTTAAGCGTCGG	AAGTGAATCGGCTTCCTCCG	FBgn0034062
CFDlib00627	CCGTGCTGCTGGCACACACG	TCCAGCTCTACCGAAGATGA	FBgn0037619
CFDlib00628	ACGGCAGAGAGATCTCTCCA	ACGCTTTAAATGCTCGCCCA	FBgn0031144
CFDlib00629	ACAACACTGATGTCCTCGCG	CGGAGTGTTGATACGTTCGC	FBgn0038805	TFAM
CFDlib00630	GGGTGGTGGTCCGTCCCCGC	TTGTAACTCTGACACTTTCA	FBgn0037379
CFDlib00632	CGACACGCGACTTATTGAGC	AGAAGCCCTGCTTGAAGGAC	FBgn0035902
CFDlib00633	GGTTTCTAAAGTAGCAGATC	TACTGAATACGCTGCAATGC	FBgn0033491
CFDlib00634	ACCTCCAGTTTCGCGGCCAT	CACTCCAGACAGATGTGCCC	FBgn0034878	pita
CFDlib00635	GCTCGCTGATCAACAAAGTC	TCCACTTGGCGGTGGTCTTT	FBgn0038805	TFAM
CFDlib00636	TGGCCAGGATTACGGACAGG	CTGTCCTTGCGCCTCCATGA	FBgn0024249	cato
CFDlib00637	TTCCTACCCCACACCACACT	TTTACGGTCAGCTCCACTTT	FBgn0032817
CFDlib00638	CCTACGCCAGCCTGGAGCGT	CTATGTACTCGGTCAGTCGG	FBgn0039712
CFDlib00639	AGGGGCTCAAACTGTGCGGT	ATGGCAACCAGCACCTCACC	FBgn0036285	toe
CFDlib00640	GCAGGCTCTCGGCCACGCGC	GTTGAGATGCCATCTTCATT	FBgn0003870	ttk
CFDlib00641	GGAGTAGGACGGATTGTTCT	GCCTGGAGAGCGTGACTTGG	FBgn0034096
CFDlib00643	CGCCTACCGTGACAATCGAC	ATGATACCCTACGACACCAT	FBgn0013753	Bgb
CFDlib00644	GCTTGATTGTCCGAATGTGA	CTCTTCGATCTCTCGAGCTC	FBgn0028887
CFDlib00646	CTCGGTCTTAATGCTCGTCA	TGATTACGCCTTTGGCACCG	FBgn0259789	zld
CFDlib00647	CGATTCTACGACCGATATGA	GGCATTTTTCTTTGCTGGAT	FBgn0038626
CFDlib00648	GCCAACCATGCCGGAAACCC	CGCCCAGGGAAGTCCCCCGT	FBgn0040318	HGTX
CFDlib00649	CTACTGGATCCTGGACCCCT	GATGGGTTTCTTGGCCAAGA	FBgn0003430	slp1
CFDlib00650	CATGCCCATGGCCGGAATCT	ATTCGCGTCATCCGTACGAT	FBgn0020378	Sp1
CFDlib00651	TGTGTTCGATTCCACATCGT	TGGCGAGGAACGAGTACTGG	FBgn0011648	Mad
CFDlib00653	TTTCGTAGGCAATGGCGGGC	ACAGATAAATGCACGGCGGT	FBgn0004837	Su(H)
CFDlib00654	TCGCAGCAGCCGACTGTCAA	GACAGCAGCTCGGAGTTCTA	FBgn0003118	pnt
CFDlib00655	TCCATGATGTTGGGCAGTGT	GTGCACGTGCTCTGGACGCC	FBgn0003900	twi
CFDlib00656	GATGAATAGCAAGATCGCCG	GTTGGATGAAGAACTAGCAG	FBgn0000520	dwg
CFDlib00657	CAGTACTCCAGAATACCTCG	ACCTTTCCCGGAAACATACC	FBgn0036179
CFDlib00658	GCGATAGCACCTGAAGGTGA	TTCAGGCTCTGGTCAGAGAG	FBgn0028531
CFDlib00659	GGACATCAACTCGGAGGCGA	CACTACAGTGCTAGTCTCGT	FBgn0037922
CFDlib00661	CCGGCAAAGGTGGCGTTGGC	GTGGCTCTGGTGCTCCAGCA	FBgn0053213
CFDlib00662	GGCTGTAGTCGAGGGGCAGG	TGAACAACTAACGGCGATGG	FBgn0051632	sens-2
CFDlib00663	GGTCGCAGTGAACCGCCGGT	CACACCAGCCAGCACAATAT	FBgn0026411	Lim1
CFDlib00665	TGGCCTGTATTCGGAGCGTA	CTACACGTGACCATCAACGA	FBgn0038128	Ravus
CFDlib00666	GCCCCTCTGGAGCGGCGTCT	CTTGATCTGCATCCGACAGG	FBgn0045852	ham
CFDlib00668	CCTCTTGGGCATTTCGGGCG	CTGATTGCTATCCGCTCCGG	FBgn0036004	Jarid2
CFDlib00669	GCCCACTGCTGCTCCGCCCA	ATGCACGAGAAACTCATGGC	FBgn0001150	gt
CFDlib00670	TGCAGGCACGCGTGCACGTC	GGCACAGTCGGGCGACCAGC	FBgn0000520	dwg
CFDlib00671	GAGGACGGGGACTCGGACAC	CCGAATGCATACAGACGATG	FBgn0017578	Max
CFDlib00672	GCGGGAGCCGTCAGTGCCCC	ACGGTAGTTATCTGATTTCA	FBgn0031391
CFDlib00673	TGGACATGATGTGGTGCATG	CCACCGCCATTGCTCGTATT	FBgn0000439	Dfd
CFDlib00674	TTGAGGTTCTCCAGGCGGAT	TAAAGTCGCGGACGCTGAAA	FBgn0010287	Trf
CFDlib00675	GAGCGGTAGCCGGTGGCGGA	TGTCGCTAATTCTGGCCTCT	FBgn0000625	eyg
CFDlib00676	ATATGCCCTTCGAGGTTCTG	CATGGTCCATCTCATAGGCC	FBgn0023076	Clk
CFDlib00677	CTCTTGACCTTCAATGTGCA	TATCTGTGGCTCACTTTGAT	FBgn0039932	fuss
CFDlib00678	CCTGCCCGACTGGGCGTCTC	CAAGATTCCAGGCAGCAATC	FBgn0000543	ecd
CFDlib00680	GCCAGCTAATGCAGCAGCTA	ATATTGGGCCTCCCGATGTA	FBgn0001325	Kr
CFDlib00681	CTGCTCCAGATCAGCAGCCC	TTTCGACATCTCGTATTTGG	FBgn0002633	E(spl)m7-HLH
CFDlib00683	TGTTACATTACAATCATGTA	TTTTTCGGTTACGAAAGCAA	FBgn0052006
CFDlib00685	TCGACGCCCTCATCTACTGC	TGGTGCGCGACGAGGAGCTT	FBgn0000099
CFDlib00686	TGTGGTCGACTGCAGTGACT	GCAGCAGATTGTTTCGGCAG	FBgn0016660	H15
CFDlib00689	CCACCGTTCCGTTGGACACC	GGAGTGCGACCTGCAGCGCC	FBgn0013307	Odc1
CFDlib00690	CATGGAAGGGCTTGAAACCC	GCGCCTCGATCAGCTGCTTG	FBgn0003499	sr
CFDlib00691	TGCCACTCCCCGTGGAGCTT	GCAGCATGACAGCGTTAAGG	FBgn0004050	z
CFDlib00692	ACCCGAAACTTTGACTTTCA	CTGTGAAGCGAAGCCGATCG	FBgn0037751	topi
CFDlib00693	GGCCAGCATATGGTTATTCA	GTGATGAACAACCAGCGATA	FBgn0038244
CFDlib00694	AAGGAGAGCGCAGGACTCAA	CTGCTGCGAAGTGGTTCCCT	FBgn0085424	nub
CFDlib00695	TGGAACCAGATACAAATCGT	TTCGGAGTCATCTGATTCGG	FBgn0022935	D19A
CFDlib00696	TCAAGAGCAACTTCAACGGA	GAACCCTCGGCCATCCGTCA	FBgn0037655	Kcmf1
CFDlib00697	ATTACTGTCCTCCGTGCACT	TCCGCTGGAACCATGTCGTG	FBgn0085396
CFDlib00698	GATGGCCGGGAAATAGCTGC	TCCGTCGGGCATCTCTTCGA	FBgn0000139	ash2
CFDlib00699	CGCCTTTGATGCCCAAGGAC	ATTATGCGCCAGGGCGCCAC	FBgn0024321	NK7.1
CFDlib00700	AAGCCCTTTGTGTGTCCTGA	CAAACTTACCGCCAATGCCC	FBgn0038626
CFDlib00701	TTCATGTTGTAGGGATTTAG	TACGCGCATCAGCTCCTTAA	FBgn0016917	Stat92E
CFDlib00702	TGACCGATTGTGGTTGGAAC	GCATCGGTGAGCTCGCTGAA	FBgn0004595	pros
CFDlib00703	CGACGCAAATTGACACACCG	CACAGAGACTGTTGCAGATA	FBgn0032940	Mondo
CFDlib00704	TCCAGCTATGGGTCTCCAAC	TGCGTCTTGAAGCATTGATA	FBgn0001325	Kr
CFDlib00705	GCTGTACTTGAGTTTATCCA	GTTGTTATTGTAGTTTCGCA	FBgn0001983	wor
CFDlib00706	GCATCAGGAGACAGAGCGTG	CCAGTACTTTGTGCCCGCTC	FBgn0014018	Rel
CFDlib00707	ACGGCCAGCTGGGTGCGCAG	GTGACTGGTACTGGCGCCGA	FBgn0037445
CFDlib00709	TCCAGGAACTCTTTGCGCTT	ACTGCGAGTGCACCCTACTA	FBgn0004795	retn
CFDlib00710	CACATTCACACGCGCCCAAT	CTTCCTCAAATCGGGCGATT	FBgn0004102	oc
CFDlib00711	GTTCTCGGCGAGGGATCGTA	CCGGCTGCTTTACCTCCGAC	FBgn0038167	Lkb1
CFDlib00712	CATTGCGCTCGAACTTAGAC	GTTGACGTACATGCGCTTCA	FBgn0015772	Nak
CFDlib00713	GTAAACGTGTCCTTTCCCAG	TGAGCTTTAATTTAAGTCTG	FBgn0037167
CFDlib00714	TGTGCTGAGTCGACACCATC	AAGGGAGTGCCGCCTGTGCG	FBgn0029736
CFDlib00715	TAAGTGCTCACTGGAGTTCG	AGCTGTGTTCTGATCGCCCG	FBgn0036876
CFDlib00716	AACGAGAGTAATCAGACGCA	TATCGGTGGCTATCATCCGG	FBgn0030697
CFDlib00717	ATGAAATCTGAGACATACTG	CCCAGCGCTAGAATTGTATT	FBgn0038630
CFDlib00718	GAAGAAATGCACGTTCGGAG	CGAACGTCCCAGCGGAAGGA	FBgn0260750	Mulk
CFDlib00720	GAGCAAAAGTCGCGATGATC	CAGGATGAGTTCGGTCACCT	FBgn0036896	wnd
CFDlib00721	CGCATGGAAGCGTTGTAGTG	ATGGCTGCCGGGCAATGGGT	FBgn0020391	Nrk
CFDlib00722	CGACATGTAGGCAAACTCGC	GCTGCGATATCTCACCAAAG	FBgn0039306	RIOK2
CFDlib00723	CTACGTGCGATCCAATGTGC	ACTCGTTCTCCCTCAGAACA	FBgn0029958	Pdp
CFDlib00724	GCTGGACACGGTGTCGGCCT	GCAGCATGGATGTGGAACGA	FBgn0026181	Rok
CFDlib00725	CTGGGGGAGAAACCTGGTTC	AATGGATGGGGACCAAGTAA	FBgn0032632
CFDlib00726	ACATGACATGCTCCTTCGTG	GTCAATTTCCGCGTGGAACG	FBgn0263968	nonC
CFDlib00727	AGAAGGCGGCCAACATAGCC	GTCACCCGAAATGTACTCGG	FBgn0016672	Ipp
CFDlib00729	CAAGTTCCAGGTCCATTCTC	GCTGTCTCTATCAAAGTGTC	FBgn0061359
CFDlib00731	CTGCATGAAGTATCCACTAG	GCTAGAATCATTGCCCTAAG	FBgn0031997	PGAP5
CFDlib00732	AAAACGGGAACTCTTCGAAA	AATGCTCACAATGTTTGGCT	FBgn0036877
CFDlib00733	TAGGTCCGGCGAGATATGCG	CATTGAAGAACTGCCGGCTC	FBgn0025740	PlexB
CFDlib00734	GCGGTCTTGTGACCGGATCT	GCGATAACCTCTCGCTAAGT	FBgn0036273	INPP5E
CFDlib00735	TAGCCTGGTGTTATGCACCC	CACACCGCACAAGTAAGCGG	FBgn0034710
CFDlib00736	GATTCTGCGCCCAATACCCC	TTGGAGAATATCAAGTACTA	FBgn0052549
CFDlib00737	GTCCGGCTTAATGATAAACA	GCAGAACACCGACTGCAGCC	FBgn0039809
CFDlib00738	GTACAACTTTATCCATCCCC	GTCTAGCATTCAATCCCACA	FBgn0036553
CFDlib00739	GATGCATGCATCCTCCGCGG	ATCGATGCTGGAGTATGACT	FBgn0037093	Cdk12
CFDlib00741	CTTATCGCGCGTGTCCATTC	GGTGGCATCCTCTTCGGTTA	FBgn0259243	Pka-R1
CFDlib00743	AGCTGATGCAATAAGCCCGC	TGATGTTCTGCTACTATAGG	FBgn0261984	Ire1
CFDlib00744	GCTAGACAGATTGGCGGGTA	CTGACTTCGGTGTGAGTGCA	FBgn0023083	fray		Second sgRNA also present in HD_CFD928.
CFDlib00746	GGTGGTCACACAGTTGGACG	GCTGCGACCATATCTCATAT	FBgn0025642
CFDlib00747	AACGCTTTACTGCGAGACGA	GGACGTGGAAAAGTGCTTAG	FBgn0037063
CFDlib00748	GAGCGAAGAAGCACAAGATC	TGATTGCAGACGGGGATGTT	FBgn0035619
CFDlib00749	GGCATTGTGGTGACTGTGGG	AACCTACGGCGACGTCTATA	FBgn0263395	hppy
CFDlib00750	GACCGCTCTGAGAGCCTTCC	CAAACGGAAGTGCTGGTGTT	FBgn0025640
CFDlib00751	GACATAGACATCGCCCAGCT	GAGCATCGAAAACCTGGACT	FBgn0250906	Pgk
CFDlib00753	CTACTCATCCGCCGTACAGA	GGTGCACAATCTTGGCGTCT	FBgn0039623
CFDlib00754	AATGAATGACTTCTGGGAAA	AATGGACACCCGCGTGGAAC	FBgn0016984	sktl
CFDlib00755	AATAACCGAAGTTATTTACC	AGCCGAATTGTTGGAAATCC	FBgn0042693	wrd
CFDlib00756	AGAAGCAGCTGTCCCGGACT	CGTTCCACCTCGGTCATGTT	FBgn0017581	Lk6
CFDlib00757	AATGCTGTTGCGTCGCGTTC	GTAGGGATGTTGCACCTTCA	FBgn0035039	Adck
CFDlib00758	TGCCGCAGCATGAGGCTCAA	TATGCCTTCTGTAGCACCTC	FBgn0261278	grp
CFDlib00759	AGGAGGGCTGCTTTGTGGTC	GGAATTTGGTGTTCCGGGAG	FBgn0003502	Btk29A
CFDlib00760	GCGTCGGTAGAGTAACGCCA	CATCAAGTATAAGAATGTCC	FBgn0014007	Ptp69D
CFDlib00761	GTGTGAAAAAATCAACGGCG	TCACCTACGCCTGGCATTGG	FBgn0003444	smo
CFDlib00762	CAATGAAAGTGAGCAACATG	GGTGCAAATCCAACGATTGG	FBgn0004198	ct
CFDlib00763	GGCTATCACAGTGTTGAAGG	CTGACCCAAAACCACAGAGG	FBgn0002573	sens
CFDlib00764	CTTCTGCCCATTTGCCCAAC	AGCACGCACATCATGAGTAA	FBgn0086348	se
CFDlib00765	ATCACCATACCAATGTGTCG	GGCAGCGGTGGCAGCTCGGG	FBgn0016797	fz2
CFDlib00766	GCGATATAGTTGGAGCCAGC	TATTCGTCACTGTTCCCCGC	FBgn0004034	y
CFDlib00768	TTGATGTGATGTTCCAGGTG	ACCACCTGCCGCGGACACAA	FBgn0051643
CFDlib00769	TTTCTATTCGAGTGGTGAAA	TTTGGCCTACATCCACTCGC	FBgn0003371	sgg
CFDlib00771	AAAATACTATTTGTGTGCAT	AGTTCTTTAGCTTGTGGGTC	FBgn0038655
CFDlib00772	GTACAGCTTGACGCGTCGGC	TCGAAGAGTCTGAGGATGAG	FBgn0024555	flfl
CFDlib00773	CAGCTTGACCCGTCCATTTT	GGATCCGGCAATTGCGCGTA	FBgn0002938	ninaC
CFDlib00774	CAGTCCGGGCGAGAATTACA	ATCGCTATGAGAAGCTCAGT	FBgn0031730
CFDlib00775	CACCGTGTGGTACTCCCATG	AGTCAACGATCGGATAATCT	FBgn0262614	pyd
CFDlib00776	GGACAACGGCGTCGTCAAGC	GCCATGCCTTCGGCACGACC	FBgn0031030	Tao
CFDlib00777	AGCTTCCTGAGCAGCACCGC	GATGTCCGTCCAAAAGAGGA	FBgn0024945	NitFhit
CFDlib00778	CGGCGCCAAGAAATCGAATG	TGCTCATGTCTTGGTGGATC	FBgn0000404	CycA
CFDlib00779	CAATCGGGGAATCACCACAC	CACGGAGTGCAGTTTCAATG	FBgn0035426
CFDlib00781	CCGCTCAGTGAAACCAGCGA	ACAGCTACGACATACCCAGT	FBgn0026402	NiPp1
CFDlib00782	GACTCATATAACTCCAGCCA	GGGGGGTAGGACGTTTTCAT	FBgn0035142	Hipk
CFDlib00783	CAAATTGAGAACCTCCGCCA	GAGTCCGGATCTTACCTCGA	FBgn0003132	Pp1-13C
CFDlib00785	GCATTTTCTGTAAGTTCGTA	TGTGCGCCAGCAACTGAACA	FBgn0002856	Acp26Ab
CFDlib00787	TTCGAAACGATGCCGCTACC	TCGAACTATGTACGCGCTCA	FBgn0030455
CFDlib00788	CAGGGCGTGTCCTCAATCAG	GAGCGAGGGGTCCAGCTGGT	FBgn0033358	spab
CFDlib00789	GTTAATGATATGTACGAGTA	CATCGAGAGTCTCATGGCTC	FBgn0004898	fd96Cb
CFDlib00790	CGCGAACATGCTGTTGTACC	CATGTACTTCATGTCCTCGC	FBgn0001180	hb
CFDlib00791	AAACGGCGGAAGTCCATGGG	GAGGAGATCGCCATGCGGAT	FBgn0015524	otp
CFDlib00792	GCTGCTGCAAATGCTCGTCA	TAACGATTACAACGATAGTT	FBgn0002561	l(1)sc
CFDlib00794	TGCGGAGAGTCGAAGCTGGA	CGCATCTCAACAAAGAGCGT	FBgn0028931
CFDlib00795	CATGGTTAAGGAGCATCACA	CAGAGACTGAGTGAGCTCAT	FBgn0050077	Blos1
CFDlib00798	CACATCGATGGTGGTCAACA	CTGATAGGTCTTGGACATCT	FBgn0002735	E(spl)mgamma-HLH
CFDlib00800	GTGCTACTCCTGTTATTGGC	CAGCTCTCTGGAATCGATCG	FBgn0022768	Pp2C1
CFDlib00801	TGCTGCACGCTCCAAAGATC	AGCCAGTAAGTCCCAGATCG	FBgn0036550
CFDlib00803	TTGCCCGCAAGCAGATGTCG	GCTCGAAGTTCAGGAAGCAC	FBgn0010317	CycJ
CFDlib00804	ACCATCACAACCACGAAAGT	TCGCGAACATATAGAATCGG	FBgn0022800	Cad96Ca
CFDlib00805	CATTGCCCAGCAATAGATGC	AACCCGCAGCTGCTCCAGTC	FBgn0243512	puc
CFDlib00806	AAACAATTTAATCGGTAAAA	ATTTCTGAGTGACATGCGAA	FBgn0014006	Ask1
CFDlib00807	ACACGATGCTCAAAATTGCT	AGCGGTGGCTTTAAGCCACC	FBgn0025743	mbt
CFDlib00808	GCAGTCACAGTACGATGCCA	TGGATCGACTTTCTCCGTCC	FBgn0266465	GckIII
CFDlib00809	GCGAATCTGGTGCGGCTTTA	GGCTCGGGAGCGAGACGGCC	FBgn0028484	Ack
CFDlib00811	TGTGGCCACGCGTTGGTACC	GGAGATCCCGGATATATACC	FBgn0015765	p38a
CFDlib00812	CAAGCTACGAAACAACAACA	CTCACCCACCATCCTGTTTA	FBgn0016641	PTP-ER
CFDlib00813	GCCCAAGACTCATCTGATGA	CTGCTCATCGTAGTACTTGT	FBgn0010314	Cks30A
CFDlib00814	CAACAAGAATACCTCGGGCA	CGAGTGCTTCTTTGCCGGCA	FBgn0029157	ssh
CFDlib00815	GAGGAGCAGAAGTCTCATGT	CCAAATCCAAGCCAAATCTC	FBgn0030899	Hesr
CFDlib00816	CAGCTGTCGGAAGCCAACGG	TCACTTTCTGAACCACTTTC	FBgn0004861	ph-p
CFDlib00817	GGAGGATCTTGAGATGCTAG	TCCCGGCGCTTTTGGCCGGA	FBgn0030963
CFDlib00818	TCAAATACGACGTGGTCAGC	GCTGGACGGATTCATCTTCG	FBgn0004666	sim
CFDlib00820	CTGTATCGTTAACGTTGTTC	ACGCTGCTCTGTGGGTAAGG	FBgn0034379
CFDlib00821	GCTGCAGATGACAGATCCGC	TGATCGTCAGGGGCAGGTGG	FBgn0032295
CFDlib00822	TCTAACACGACGGTGGAGGG	GGATGTGCCACGTTCTGCGG	FBgn0003044	Pcl
CFDlib00823	GACAACATGCTGATTGCCGA	AATCGCATGTTGGCCCACAC	FBgn0000611	exd
CFDlib00824	ACTATAAGGAGGCGTGTGAC	GTGGAATGCGACGACCGCCT	FBgn0003460	so
CFDlib00825	TTCGTCTCCTCGGGAAGCGA	TGCTACAATGCCTATAGCGC	FBgn0015550	tap
CFDlib00826	AGTTCGAACTCACCTTTGCC	TGGGATCTAGGGGGAAGGAG	FBgn0038016	MBD-R2
CFDlib00827	AGAGGACGAGGATGTCACAC	TGCAGGCGCAGGCCAAGTTG	FBgn0032388
CFDlib00828	TAGGGCATAGCCTATCTGCA	GAAATGTCCGCTCCTGTAGA	FBgn0039015	Takl2
CFDlib00829	CCGCTGCCTCGCTGACGATC	GGTCACGTTGGTCAGCTCAG	FBgn0030964	Pvf1
CFDlib00830	TGGCATAGGCGAACTTGGTG	CATGCACTCGTACATGCGCC	FBgn0031696	Bub1
CFDlib00832	CTGAGGTCCAAATTCTCGTT	GTGGATAATGGCAATATGAA	FBgn0003731	Egfr
CFDlib00833	GGACGCCTTCCTCGGATTGT	TAGTGACTCGGATGCACCTC	FBgn0035036
CFDlib00834	CTCCTTGATCAGGCGCGAAC	CAGCGAGGAGGCCGGTATGT	FBgn0028550	Atf3
CFDlib00835	CTGCTCCTCCTTGATGTTTG	CATCATCACGTCGGCGTCGG	FBgn0035997	phol
CFDlib00836	GATGACCAACGGCATACTGG	GTCGCTGAATAACGTATGCA	FBgn0014143	croc
CFDlib00837	AAAGGCAACCGGAAGTCGTC	CATGTCACCGGCTTATCTGC	FBgn0000459	disco
CFDlib00838	CGTTGGACTGGGGTCTTTTA	GCTCCGCCAGGTGATCCTTG	FBgn0033252
CFDlib00839	CAAATGAACGAGAGCGAATG	CATTAGTTCCGTTAGCTGTG	FBgn0023091	dimm
CFDlib00840	ATACAACGCACGCTTTCCGG	TGTGTTACGCAGCTCGCCAG	FBgn0034650	NC2alpha
CFDlib00841	GTATTCGCACGTCAAGGCAA	GATGGAGATCTGGATCCAAA	FBgn0032209	Hand
CFDlib00842	TCTGTTCCACCTTTTCGATG	AAACTGTGAGTCCTTGGTCA	FBgn0003448	sna
CFDlib00843	CAGATCAATCGACCCATGTC	TCCAGTGCGTCCCGCCGGCA	FBgn0015721	ktub
CFDlib00844	GCAATGCCCGAGGTCCTCAG	CCTCTTCTCTCGACTCCGCT	FBgn0016076	vri
CFDlib00845	CAGCAATGTCCCACACCCAA	CCGGTTCGCTGACGCCCGCT	FBgn0038391	GATAe
CFDlib00849	CACCGCCCACACGGGATTCG	CGTCCCTTACGAGGAGGAGG	FBgn0037379
CFDlib00851	GGAAAGTCAGACGCGATGGC	GCTTATGCTAAATGCTAGCG	FBgn0051632	sens-2
CFDlib00852	CATACCGCATGTGCCCATTA	CAGATCCGCACTGAACTCCA	FBgn0260243	E(var)3-9
CFDlib00853	TGCTGCGTCCCTCGCAGGCG	GGAGTTCATCTACCACGGCG	FBgn0000210
CFDlib00854	CGTCCACGTAAACTCCTGCA	CGCGTCGACTTGAGGATTCG	FBgn0259785	pzg
CFDlib00855	CAAGAGTGCGTACCGTAAGA	ATCCCAGAGTGCAGGCCTAC	FBgn0027599
CFDlib00856	GAAATCGGAGCAGCCTTCAG	TAAGTTGGATGTTCAGCAGT	FBgn0011236	ken
CFDlib00858	AGTCCTCCGATGGCGAGGAC	GCCCGTGTCGCTCAGATCGA	FBgn0003512	Sry-delta
CFDlib00860	ATAGACGCACCGCCTGCGAT	CAACTGCTGAGCTCCACGGC	FBgn0037672	sage
CFDlib00861	CAGCGATCGGATGGAGAAGC	CAGCGCCTACTTCCCCATAA	FBgn0031086	fd19B
CFDlib00862	TGTAATACTGTTCTCGAAGA	TGTTCAGCTTGTTCATCGCC	FBgn0033569
CFDlib00864	CTTGAAGGTCTTGCTGGAAC	TCACCACCTCTGTGAAGTGC	FBgn0038965	mats
CFDlib00866	TCTTGTGCCGCCAAATGTCC	TTCGAACGCTTAGCAGCTTG	FBgn0036529	pgant8
CFDlib00867	TGGCATTGGGAGAACATATA	CATGGGTCGCTTAGGAGTCG	FBgn0032721
CFDlib00868	CAGACTCGGGTGCTTTTCCA	TCAGTCCATCGCCCTCGCAG	FBgn0016650	Lgr1
CFDlib00869	TGGCTATGCTGGAAAGCAGG	AGTAAGTGCTCTTCCCATTG	FBgn0039473
CFDlib00871	CTAAACATCTGGATGCGCAG	CACCAGCAGTCCATTCAGCC	FBgn0083979	Ir10a
CFDlib00872	CGCGTGAGCACCATCCGCAG	CTTTCGGCTCAAAGTTGCCA	FBgn0030930	GalNAc-T2
CFDlib00873	GGCGAGGTGCGGTACAAGAA	AGTGAATCACATCAGAGGTG	FBgn0033929	Tfb1
CFDlib00874	ACACCGTACCAATTCAAAGT	TTGGACTTGTTCAAAAGCGA	FBgn0039914	mav
CFDlib00875	ACATCTTATAACAGCTCTCG	CTCGCACGCGTTTGCATTAA	FBgn0032076
CFDlib00876	GCCCAGGAGGCCGTTCGCAA	CTGTTCCAGACTGAGCCGTC	FBgn0004066	Prosalpha4
CFDlib00877	GCCCCCATGATTGTTGCCGC	CGGGTCCCTGACCTTGGCTG	FBgn0037705	mura
CFDlib00878	ACATGACACAATCTGCGGGT	GTGTCAGTAGCAAGGGCTTG	FBgn0261859
CFDlib00880	GATACGGAAACATACATATC	ACGTTACTACCAGCGCCATT	FBgn0087011
CFDlib00881	CGAGCAGCACTACCTGAGCA	CATCCTGACTGTTGTAACCA	FBgn0259175	ome
CFDlib00884	CAAAAAGTTGGAGTAAGATT	TAACGGCCCTTGCCCGAAAG	FBgn0000038	nAChRbeta1
CFDlib00885	TAGAGAGCAGAGCGCAATTA	GGAGTGGGCGGTCTATCGGG	FBgn0053543
CFDlib00888	TCCAGCGCTTCGGACATAAG	GCCGCGATTGGACGGACTTT	FBgn0029880
CFDlib00889	AGTCTTCGATCTGGACTAAC	TAGCTAGGCTGATAGTTCTG	FBgn0037240	Cont
CFDlib00890	CTTCAGAGTTAGGCCCATCT	TGTTGTTAAATAAGCTGCCC	FBgn0034081
CFDlib00891	ATCCGGCGGAATGCAACAAC	TGGACTGACAACGATACCGC	FBgn0034602	Lapsyn
CFDlib00892	GGCTGCCGTCACGTACAATC	TTGAGCACTCGGGGATTGGT	FBgn0038686
CFDlib00893	CGACGCGGTTTTATGCAGCT	TGGCTAGCACTGGGCAACTT	FBgn0259728
CFDlib00895	CCACCGCCACGCCCTCCGCG	GCCGCTGATGTACGCAACGA	FBgn0016920	nompC
CFDlib00896	CTGACGGCTCTTCTTCGAGG	TGGCTGGCGTTAAGTTCATG	FBgn0039338	XNP
CFDlib00897	GTCGCTATGCCGCGGCGACC	TTGTAGCGGGCGGAGGCGCG	FBgn0002781	mod(mdg4)
CFDlib00898	CGTCTCCAAAGGCAAAAGTC	AGATCGAGATACGCTCTATG	FBgn0011260	Sema2a
CFDlib00899	ACCATACGCGACGTTCGCAC	GGTGGAGATGTAGGTTCCTC	FBgn0004611	Plc21C
CFDlib00900	GATGAGGATTCTCAGGTGGC	TATGACTATCCGTATGTCTG	FBgn0036289
CFDlib00901	CTCTGGACTCAGGCTGCGTA	ATCATCGACATGAAGGGCGT	FBgn0033437
CFDlib00902	GCTGCTCATGTTTCCAGGAG	CACACGGTACCGATCTACGA	FBgn0011743	Arp53D
CFDlib00903	CTGCGAGTAATAGTGCACGG	TCGATGCATTTCTGGGCTCG	FBgn0038262
CFDlib00905	ACCTATGCGATAGCAAGTGC	TCAGTGCGTCGGGCATCTCG	FBgn0004360	Wnt2
CFDlib00907	GGCCACCGCAAAAGTGCCGA	TCTGGACTTTCTTTATCACT	FBgn0036770	Prestin		Second sgRNA present in CFDlib01233.
CFDlib00908	CGTCCACTGGCTGCTTCGTC	CTGCAAGCACTTCAGGGAGC	FBgn0027793
CFDlib00909	CATGGACAACAGCATCGTCG	GCAGGTGCAGTCCGTGATAC	FBgn0265784	CrebB
CFDlib00910	GGATCCGAAGATACTTGATA	ACGCAGCCCGTGGTCAATTC	FBgn0262738	norpA
CFDlib00911	GAAAACTATCACAATGGAAG	ACATTCACACGCAAAATGCG	FBgn0031681	pgant5
CFDlib00912	CTGCGGACTCAAGAACTCCA	CCATCGAGTGTCCGACAATG	FBgn0032029
CFDlib00913	CCACTAGCTCTATGCTGATA	CTTCAGGCTCGCCATCGTTC	FBgn0035268
CFDlib00914	AGAGGGCATTGTGCGCCTGA	TGCGCACACGCTCGTAGCTG	FBgn0033378	tsu
CFDlib00915	CCGGTGATGAACAAGACAGT	TTATCAGACTTCGAAATCTC	FBgn0265267
CFDlib00916	TCTTGAATTGTCCCTGACCC	ACTTGGATGCGACTCATGTC	FBgn0028543	NimB2
CFDlib00917	ATTGGTTGTCCGCCGAGGAC	TACCTTTGGCGTCTCGGTTG	FBgn0032235
CFDlib00918	CGGTGCCCTGCTGCGTTCCC	AACCATCAACCCGACCACAG	FBgn0012036	Aldh
CFDlib00919	TGTGGAGCGCTGTTGCGACA	CGAAGATTCCCCCTCTGCAG	FBgn0036897
CFDlib00921	CATCTTCAGCTCCCAGATGA	CTGCACAATGCAGTCGCGCG	FBgn0039789
CFDlib00922	ACCTGCCCCATGTGAATATG	TCTTCAACTTTCTGCCCGTG	FBgn0035206
CFDlib00923	TCCCCATGGCACCTACTTTG	TGCGTATCCGGTTATATTCA	FBgn0042102
CFDlib00924	TCATGTTGAACAGCGAGAGC	TGCTAATGCTGTGCTGGTCG	FBgn0000490	dpp
CFDlib00925	CTGGCACAGTTCGCATGTTC	CCTCGAATGCTGGCAATTCA	FBgn0030880
CFDlib00926	CTCCATTCCACGACAGTTTC	GCAGATGACGATCTCCTTCT	FBgn0035206
CFDlib00927	TGAGGCAGCTGTTAAGCTCA	AGATCTGGATTCACTGTGCT	FBgn0034629	Acox57D-d
CFDlib00928	CTGACTTCGGTGTGAGTGCA	AGACAGATTGGCGGGTATGG	FBgn0023083	fray		First sgRNA also present in HD_CFD744. Second sgRNA also present HD_CFD1205.
CFDlib00929	CGTGAAGGTGCACATGCCGT	CTCTTCGTCGGTGAAGAATG	FBgn0039595	AstA-R2
CFDlib00930	GAATGAGCCGCCAACACCAG	TGATGACGAATGGCCACAGA	FBgn0053208	Mical
CFDlib00932	GAATCGCCGGGCAACTTTCG	AGTGCAAACGCATCAAGATA	FBgn0030466
CFDlib00934	CAACAGCACTAGCTTCCTTA	ATTCACTCATCAGCTCGGCG	FBgn0036910	Cyp305a1
CFDlib00935	TGATGAATGGAAGCTATCTA	CTGCCCCAGGTGCTTCAGGA	FBgn0037140	SLC22A
CFDlib00936	TCCGGGTAGATGTACTCGTA	AAGGAGTCCACATTGCCGGT	FBgn0261850	Xpd
CFDlib00937	CAACTACAGCAGTCGGCCGG	ATGCGCAACATTTGCGCAAA	FBgn0003984	vn
CFDlib00938	CGTCGATTTGTGAAGCGACT	GGTATTGGCTGCGCAAAACG	FBgn0085420	DIP-delta
CFDlib00939	CGATCCGATTTAAAGACCCG	AAGGCTAGACTTGAATAACA	FBgn0034458	Ir56d
CFDlib00941	CACCCAAAACGGCCACTCCG	CAAGCAGTTCGGCTTTATTC	FBgn0002031	l(2)37Cc
CFDlib00942	CGATATAATCCACTTGATGC	ATAGCATATATTGCGGCATG	FBgn0034286	dpr13
CFDlib00943	CATCGAACTTGGAGGTGCGG	GAAGCTCATCAAGAGATCCG	FBgn0038966	pinta
CFDlib00944	GAATACAAACTGGTCGTCGT	CTCGTTGTTAACGTTCCACG	FBgn0003205	Ras85D
CFDlib00945	CTGGCCGTTGACCGTCTGAC	ACGAGGTCACCCAACTGAAG	FBgn0037465
CFDlib00946	GCGCGCATGCGCCTGCTACA	AGTGCAGGGAGCACCCGACG	FBgn0001189	hfw
CFDlib00947	GAGGTGCTTGCGCCATGGCC	TGAGCTGACCGACACGCCGG	FBgn0035238
CFDlib00948	TCCGAGCCTTTGTATATCCA	ATCACATTCAACCTGATTCC	FBgn0050464	Ir52d
CFDlib00949	CACTTCCCTCCTGTACTTCC	TGCAGAGTGTCCCTTGATCG	FBgn0035103	Vdup1
CFDlib00952	TGCCCTCCAGTGTGGCCTTG	AGCGCCGCTGGAAGCGTATG	FBgn0027793
CFDlib00953	TTTGAGAACTGGAATTTCCA	ATCAGATAGTGTTCTTATTG	FBgn0050468	Ir52c
CFDlib00956	CTTTTTCACAACAACACGCA	TATGTCCATCACTTGAATAA	FBgn0042105
CFDlib00957	GAAGATCGATCCGAGCAGTT	TGATCCACTTCCTCTACTGG	FBgn0039207
CFDlib00958	CGCCAAAGTCTTCCAATCTG	GCAGCAGAAGCAGCTATATG	FBgn0030892
CFDlib00961	AACCGGAACCGGGCTTCTCC	GAGAAAGTCGTCCGGTGATG	FBgn0039338	XNP
CFDlib00962	CCTCCTAATCGGTGGCGTGG	GGTGAGTTTCGGCGTATATT	FBgn0038750
CFDlib00965	GCCCCAGGCCGATGGTACCA	AGTAAGCATCGGTGGAGCTC	FBgn0039471
CFDlib00966	TCGCCAGTTCCTCGTACATG	AGCAAACAATTAGGATTGAG	FBgn0034928
CFDlib00967	CACGAACAACGTGTTTCAAC	CTGGCCGCGATGTCCACTGG	FBgn0261930	vnd
CFDlib00968	TTGCGATTGACACGTATCAA	TTCACTACGCTGCAATGCAG	FBgn0030456
CFDlib00969	CAGCGTGTCCTGGAGAAGTG	CTACGAGAGTATCACCACAG	FBgn0038718
CFDlib00970	AAAACCCGTGCGCCTGCCCA	GTCATCCGTGTATACCAGGA	FBgn0050463
CFDlib00972	CCAGGCTGTTAACGTTGTTC	GACATCGGCAAGAATATCCT	FBgn0041707	7B2
CFDlib00974	ACAACCAGGCCAACGCCGAT	CTCCACCCCCCGGCCGCCAT	FBgn0002525	Lam
CFDlib00976	TCGGATTGCAGGATCCGCCA	TACTCTGCTTTTGGCTAGGA	FBgn0003209	raw
CFDlib00977	GTGACCGTCGGGAGAGAATA	GGTATTTCCTGCCTTATTGG	FBgn0004066	Prosalpha4
CFDlib00980	CAGCATGGTAACCGCGGCAG	GTGGGGTCCTGCCATGGCCA	FBgn0051814
CFDlib00981	CGAGCAGTCCTCCGACATAG	ACCGGATATAGCTTCGGCTA	FBgn0024987	ssx		Second sgRNA also present in CFDlib01253
CFDlib00982	CGAAATGCAGCGCGAGGCTC	TGTATCGCCTCGCCGGTGGT	FBgn0086656	shrb
CFDlib00983	CCCCCGTCCTGGCATCTAAT	TCGATGTATTCAGTAAATTC	FBgn0051708	DIP-zeta
CFDlib00984	CATTTTAGACCTGGTAGCGG	CTCCAAGGCAGTTATAAAGT	FBgn0035971
CFDlib00986	TTTGGGCCAGGTGCGAAACG	GCCGATTCCTAGGCCCATTC	FBgn0010453	Wnt4
CFDlib00987	GGTCTGCTTTCCGATAAGAT	GATCAGATCCTGGCCAAATG	FBgn0038720
CFDlib00988	TGGTGAATGGCGGGTGTCCT	ATCATGAACTCAGCATGTCG	FBgn0030898	Andorra
CFDlib00989	CTTCTTCAGATTCCCGATGA	TTTAGGATGTTGCCTCCGAT	FBgn0010246	Myo61F
CFDlib00991	CGTTGCAGTACAGGTTCCAC	GCCTTTGATGAGAACCGCGA	FBgn0036913	Usp32
CFDlib00995	CTGCCCACCATTGGCGAATT	GCCACTGATCAAGTGCCCCC	FBgn0032879	CarT
CFDlib00996	CGAGCGGCTGCGAATCACGC	ACGCATTTATGCGGTCGTTG	FBgn0037856	Leash		second sgRNA also present in CFDlib01382.
CFDlib00997	CGCCTGAGTCAGCGCTCCAG	TTTGCTGTGGCTTCTCTGCA	FBgn0036040
CFDlib00998	AAATGCCGGAAATATCCTCC	GTCAATGCGATTCCCGAGAA	FBgn0051646	DIP-theta		Last sgRNA also in HD_CFD1247!
CFDlib01021	AAAGCTTGTGAAGCTATTCC	ATTCCGTGCCAAATGCCAGC	FBgn0038547
CFDlib01022	TATAGCAGTTGCCCTGACTA	AGACATCCTCAAGGAACCGA	FBgn0035137
CFDlib01023	ATGGTCCAGATCCTCACCCG	TCACTTCAAGGCCCACGCAG	FBgn0038244
CFDlib01024	GGAAATTTGCAAACTATGCA	GGCAGTCACCAAGTTCTTCA	FBgn0015025	CkIIalpha-i1
CFDlib01025	GCTATCACGTCCGCCCGACA	GCCACCGTGGTCGGAGTGCT	FBgn0003334	Scm
CFDlib01027	CAAGCACCAGATGATTCATT	TTCATGGGATACAAGCTTCA	FBgn0039355
CFDlib01028	ATGAGTTCAGCAATGTATTC	AGTTTCTGGATATCGCCCGT	FBgn0040918	schlank
CFDlib01029	TGTCTGGCAGACGGCCGTCA	ACTGTCCAACAGTTTAGCAA	FBgn0000575	emc
CFDlib01030	CGGAGAGATGTGGCGAGCCA	ATGTTGTGGATGAATTCCAC	FBgn0038978	tHMG1
CFDlib01031	TATGGCGAATCCGTACGCTA	CATATGACTCATTGTTCCAC	FBgn0028993	scro
CFDlib01032	CGCTGATGAAGTGGCGGTTT	AATCCAACAGACCGGAGTTT	FBgn0050011	gem
CFDlib01033	ATCCGCTTTGCAACTTTACG	TTGGGACTAATTTCCGGATT	FBgn0026058	OdsH
CFDlib01036	CTGCACAAATACGAGAGCGA	AAATACCGCCATCAAGTAGT	FBgn0053557
CFDlib01037	TTTGGGTCAGGCCCAAGGCT	GAATGGTCGTTTCTCCGACT	FBgn0000411	D
CFDlib01038	GTTTACTGCGCTCAACTCCT	GTGTTTGGTGTGCTCATCTG	FBgn0023097	bon
CFDlib01039	GGAGGACGAAGAGCCTAATA	ATCCTGCATTGCAGAATCAC	FBgn0037920
CFDlib01040	GGATCGGGATTCGAGCATGC	GAGTCCTCGTGTAGGATCCA	FBgn0003598	Su(var)3-7
CFDlib01041	ATAGACAGATTCCTCTGGAG	AAGGTCCCTGCTATCCACGT	FBgn0038766
CFDlib01042	ATTCACTCTCAAAGAAGCAG	TGCTGATGCACAATTGACAT	FBgn0004859	ci
CFDlib01043	GGAAAGGCCCACAGTTCTAA	TGAACATGATGACCCTGTGC	FBgn0038765
CFDlib01044	AGAATCGAAAGCAATACAGC	GCCTCAACGGATTCGACAGC	FBgn0005624	Psc
CFDlib01045	GTCGCGGAACGTGACGCTCT	GAACCTTTGGGACGCCCACG	FBgn0027514
CFDlib01046	AGCTGTAGCCATTTCTGTAG	CTAGAGATTAAACCGTGTCG	FBgn0019809	gcm2
CFDlib01047	GTGGTTGTGATGTCCATGCA	ATAAGGCGCGCTATTTCTGG	FBgn0035625	Blimp-1
CFDlib01048	AAGTACAGGTGAAGAGGATT	CGCAGACATTCCACCACCAG	FBgn0036791
CFDlib01049	TTGCTGCTGCCGTCTCATTT	GCTGCTAAGTGCTATCATCC	FBgn0005386	ash1
CFDlib01050	CGACGAAATCATACCGGAGG	TCGATCATCCAGGGCGATGC	FBgn0005596	yem
CFDlib01051	ATGGATCGCGACGCGGAGGA	TTGACGCCCTCCTCATCGTA	FBgn0029939
CFDlib01052	GTCAAGACGTCGTCGATTTC	GGAGTCATTCGCCGGCTGCA	FBgn0039039	lmd
CFDlib01053	AAATGCCTTTAAATCTTACC	TGTGCGCTGCTAGGGTGATC	FBgn0029928
CFDlib01055	CGGCGTAGCTGTAGTGGCTC	GTCGCACATCGAGGAGACTT	FBgn0001077	ftz
CFDlib01057	GAATAAACCATCATCCTGCG	GGATGGAAGCCAGAATCCAC	FBgn0031894
CFDlib01058	TGAGCTCACTCAGTCTCTGG	TCGCCAAGCAGACCCACCAA	FBgn0050077	Blos1
CFDlib01059	AAGCACCTGGTTCAAAGGCA	GTGCCCGTTTCCTGCAAGTC	FBgn0033449
CFDlib01060	GCAACGAAGCGAACGATCAA	ATTCTTGGTAGACGTTCGCG	FBgn0014949	btn
CFDlib01061	TTTGCCGCAGGTGCGGAGAT	AATTGCCAGGATGATATTCA	FBgn0037555	Ada2b
CFDlib01062	GGATATGACCTCAACAGCGG	TGAGGCGAGGCATGGGTGGA	FBgn0001138	grn
CFDlib01063	CTCATGTATTTGTACAGCTT	CAACATGAAGTTATCAAATA	FBgn0039367
CFDlib01065	CTAAAGCCCTTCCAGGGACC	TACGATCTCGATGAAATCGG	FBgn0033627
CFDlib01084	CATCACCACTGCGGTTATGA	TTTGGGCCCAGGCAGCCCGC	FBgn0024288	Sox100B
CFDlib01085	ATCGGCTCCTGAACCAGGAC	TGCTCTCGATGATACTGGGA	FBgn0004607	zfh2
CFDlib01086	GAAACGTAATGACTCGCAGA	ACCCGAAGAAGTACGGCAAT	FBgn0052719
CFDlib01088	AAACTATGATGGCGCATATA	CCATCATGGAGTGAACCCAC	FBgn0040318	HGTX
CFDlib01090	CCGTGGATGCAGTGGCGCCC	AGCATCTCCATCTGGGCATA	FBgn0002576	lz
CFDlib01092	TCGTACTTACAACAACATAG	CTGGTGACACCATCTTCGTT	FBgn0000560	eg
CFDlib01093	TCCTAAGTGGAACTCTGGAA	AATCGGTTACGATGCAGCGA	FBgn0038273
CFDlib01096	GCACAAACTTGTTTATTACC	GCCATTAGTTGAGCCGGCGG	FBgn0032741	Sidpn
CFDlib01097	CCATCGAGTGCCCTGATGCA	CATTGGCGAACTCAAGTACG	FBgn0015664	Dref
CFDlib01098	AATATGGCATACGAACGTTT	TCATTTCATAGCTCATATTC	FBgn0002521	pho
CFDlib01099	GGAGACGCGGCCGCCATGAA	GGGCGTGTGGTAGATTCTCC	FBgn0013755	Bro
CFDlib01100	ACATCAGAGTTAGCGGGACT	ACGTTCCCAAGAGGACAGAA	FBgn0008651	lbl
CFDlib01101	CAGCGACGAAGATCAAAGCT	TCGGGCGATGTGGAAACTCT	FBgn0261064	Rbsn-5
CFDlib01116	GCTGCTCAATCGACTTGGGA	TCCTCGCTGCTCAGATCTGG	FBgn0036725
CFDlib01117	AGATCGGCAGCGATCGCTCG	CCATTCGATTGAAGTGGCGA	FBgn0085424	nub
CFDlib01119	ACAACGCGGACAGTAGTAGC	GACGCACATACGAAATCACT	FBgn0052772
CFDlib01122	TATCCTGATGATTTGCTCTC	AAAGCTGAAGGCCTTGACGT	FBgn0016970	l(2)k10201
CFDlib01123	CTTCTGGTAGATCTGGGTCT	GCCGAGCTACGAGGTGATGA	FBgn0000591	E(spl)m8-HLH
CFDlib01125	GAGGAATTCGGCCAGCGACC	AGAAAGGTTTCCGCGGTCGG	FBgn0043001	Chrac-16
CFDlib01128	TGGTGTTAAGGGCGGTGCGT	GATGCTTCCTAGCCCGAAAC	FBgn0032707
CFDlib01129	AGGACACTCATCTGTGCATC	GTGCCCGCCAGTCACACAGG	FBgn0051612
CFDlib01130	GCATTCGGACGTGGCTCGCT	AGGCGAAGAAATGCTGTTCA	FBgn0260789	mxc
CFDlib01132	TCCACCGAATTGCACACCTG	ATCACTGTCTCCATCGCTGT	FBgn0036124
CFDlib01133	ATCGCTTGTGGGAACTCCCA	TGAGGCTAGCACTTTGGGAT	FBgn0001990	wek
CFDlib01135	TGTGGTCCAGGAGGTTTATT	AAACAGCAGTTAAGCAATGG	FBgn0037722
CFDlib01137	TCGAAAGCGACGATCGCAGA	ACTGCTCATCGCCGTAGCAG	FBgn0005694	Aef1
CFDlib01138	GGATGTTCGTGATCATATGA	CTCCACCGGCAGCGATTATC	FBgn0005613	Sox15
CFDlib01140	TGATGTAGATATGCAGTCCG	ATATCCAGTTTGGACTCGTT	FBgn0010328	woc
CFDlib01141	GTCTGGGTGGCCCTGGAGCA	CAGGTACAAGTCAGCGTTAA	FBgn0041105	nerfin-2
CFDlib01143	CCAGTCGCTAGCCAGTCCAC	CATCTGCTGCGGATAACAGG	FBgn0003339	Scr
CFDlib01145	TTATGTATCCGACTCGATGC	TTATTCGAGCGGCATACATG	FBgn0015396	jumu
CFDlib01147	ACATTGCTAACACGACCCTT	TGAGATTAGCGAGGACATTA	FBgn0015602	BEAF-32
CFDlib01149	TCATGCCTCATACACACAGC	GTAACCCATGTTAAAGCTAG	FBgn0085432	pan
CFDlib01152	AAGAGGCTGTATGATCGAGA	GGTAAGAGTGCCTCAATAAA	FBgn0042696	NfI
CFDlib01154	TCGGCTAGCGGCGGCAGCCT	CAGAGTCCACATATTGCACT	FBgn0020379	Rfx
CFDlib01156	TGCTGGAGGCTGGAGCACTG	GCGATAGGCCGGTGAGCGAC	FBgn0042630	Sox21b
CFDlib01160	TTCCAGGACAACATAGCCAG	TTCTCCGAGACACTCGATCC	FBgn0085405
CFDlib01161	GTTGGAGGAGAGTCCTAGTG	CAATCTGCTCAGTAGCGGAG	FBgn0259785	pzg
CFDlib01162	CATCGACCAGACTACGTTAA	CGAATACGCCCTCGAGGATA	FBgn0021738	Crg-1
CFDlib01163	TCGCCTGCGACTGGATCTTC	CTGTTTATACGTCTTGGGAT	FBgn0036538
CFDlib01164	TAATGGTGGACGCGTACTGA	CATGGTCATAACCGAACGAT	FBgn0045759	bin
CFDlib01166	GTGCGGTGGATTCGTTGACA	TGTAGGCCTCATTTAGGAGT	FBgn0083981	RunxA
CFDlib01168	CGGCTGCGACGAGTAGTAGC	ACGAACTGGAGCGCTATCTG	FBgn0040765	luna
CFDlib01170	TGACGCCTCTAGCCAGCTGG	ACATGATATTCCCTCGTACT	FBgn0050431
CFDlib01171	TGCTCGACGAGCTGCGAGTG	CATCGCTGGCTGCAGCGGAC	FBgn0052296	Mrtf
CFDlib01173	GTCCTGAAATATCCGGCTTC	CCGGCGAATGATTTATTTGG	FBgn0038039
CFDlib01174	GGACAAGTTCGCACCCTACG	ATGTTTGACAAGAATTTGGA	FBgn0027364	Six4
CFDlib01175	CATCGTCAACTGCGACGTTT	TGTATTCGATGGACTTCTGC	FBgn0039509	bigmax
CFDlib01178	TCCTCATCCTCATATGTATG	CTGCACTCCTGTCCAGAACC	FBgn0040366
CFDlib01179	CTTGCTAGAGAGCTTGTCCT	AACATCCGAATTTCAAGGGA	FBgn0002932	neur
CFDlib01180	GGTGTATCGCTCATCGAAGC	ATCCCAGTCCGACTGCGCTC	FBgn0015589	Apc
CFDlib01181	ACAAGTGTCGGTTGCCAGAA	ACCTTTCGCAACGGCCGTCC	FBgn0004647	N
CFDlib01182	CTTCTGCCAGCCTTCTCGTC	CTCCTTCTTGGTATAGCCAC	FBgn0015589	Apc
CFDlib01183	AGGAGCAGTAGTCAACGATC	GTCCATCTTTAGCTGCTCCC	FBgn0015589	Apc
CFDlib01184	GAGGCAGGTCACATGATCGC	CACCTGTTCCTATGACATCG	FBgn0004647	N
CFDlib01187	GCATCCGCCCAGCCAAGAGT	GCGCTGACCAGTTCGTGATG	FBgn0030869	Socs16D
CFDlib01190	TTTCTTAAGGGCGTGATCCT	CAGCACGTCCTCACTGCTGG	FBgn0033929	Tfb1
CFDlib01191	GCTCAGGATATTGTTGACTC	CATAGTACTTATAGCTTGCT	FBgn0039900	Syt7
CFDlib01193	AATATTGGGCAGGAGCCCAG	CAGATCGCGAGACACGGCGG	FBgn0040060	yip7
CFDlib01194	GAGGATATCCAGGCAATGGG	CATCACTCCTTCGCACAACA	FBgn0025837
CFDlib01195	CTGCGATTACTGCGATCCCA	CTCCGCCTGGCAATAGGAGA	FBgn0002526	LanA
CFDlib01196	GCTCTTCTCCTCTGACCACT	TAAAGGTTGTGAATTGCAAT	FBgn0037465
CFDlib01197	CAACAGGTTGTGTGCCTCTT	ATAGAGATTCATCTTTGTTA	FBgn0010549	l(2)03659
CFDlib01198	ATCGAGCAGCGCAATGGCCG	TTTCTAGAGTTCTTCGCCTG	FBgn0035400
CFDlib01200	TCCACCGCCGGGTCTGCGGG	GACACTCACGTCATTGGAAA	FBgn0037140	SLC22A
CFDlib01201	GTCATATTATTGGGTAGCTC	TCCTATTACTTTCTACCACG	FBgn0037140	SLC22A
CFDlib01202	TAGGCAGGGATTCAACGGGC	CAAGAGAGCTGATCCAGCGC	FBgn0043069	MESK4
CFDlib01203	ATCGAAACTGATGGACAACA	GTTCGAATGGAAGTGACCTG	FBgn0041723	rho-5
CFDlib01204	GAATGAGCCGCCAACACCAG	TCTGTGGCCATTCGTCATCA	FBgn0053208	Mical
CFDlib01205	AGACAGATTGGCGGGTATGG	AAAGTGCGCCACACCTTTGT	FBgn0023083	fray		First sgRNA also present in HD_CFD928.
CFDlib01206	GGACATTGGAACGGAATCGC	GACCTCCGCCAAAGAATATT	FBgn0025836	RhoGAP1A
CFDlib01208	GATCGTTCTCGAGGATTCTC	GCAGGCCTTAAGATTCGAGT	FBgn0051792
CFDlib01210	CGATGCGGCTGCGATGCGGA	GGGATCCCACACTGCTGCAG	FBgn0261563	wb
CFDlib01211	TAAGGCAGATCCCGGGCTCT	GCTACTGCTGGCTGCCCTCA	FBgn0030932	Ggt-1
CFDlib01212	TCGATGTGGTCCGCAGTGGG	AGCAGCAGCGACACTTCCAG	FBgn0086707	ncm
CFDlib01213	CGGGACTGAGCTCCGGACAG	CTGCGTCTCCTGGATTTGTC	FBgn0039728			Second sgRNA also present in CFD886
CFDlib01218	CACGGACAGCACGGAAATCG	ATTGCTGTTGCTATCATTGG	FBgn0003330	Sce
CFDlib01219	GGGCGAGCGTGCGGATCAGC	TCGTTGTTGTTGGATCCCGA	FBgn0003660	Syb
CFDlib01220	CGTTATTTCTGCTATTAACG	CACCAAAGGGAAACTCTACA	FBgn0260862	Vti1a
CFDlib01221	GTGCTAGGCACAATTATATT	GAAGCTCATGAAGAACATGA	FBgn0035936	Tsp66E
CFDlib01222	TGGGAGGATTCGCGGAGCAT	CTCGACTCGCATCTACGACA	FBgn0036111	Aps
CFDlib01223	ATCCGGATGACAAGTGCTCC	CCGCTCCGGCCACGATAACT	FBgn0259794	sinah
CFDlib01224	CTCCGCACGGACGTCCTGGT	CAGCACGTCCAGATTTAGGG	FBgn0030638
CFDlib01225	GGCAGGGCGTCGTCCATACC	CGATCGACCGCAGGATCCAA	FBgn0034479
CFDlib01226	TAGAGAGCAGAGCGCAATTA	GGAGTGGGCGGTCTATCGGG	FBgn0053543
CFDlib01227	GAAATGTCCGACTCCAGCAA	GGATTGTATTGTGGACATAA	FBgn0264326	DNApol-epsilon255
CFDlib01228	GGCATCCACCTCGTCAAGGG	AAAGACGAAGGAGGCTACCG	FBgn0010397	LamC
CFDlib01230	CGAGAGCGACGCTACTCGCC	TCAGCGACAGTTCATGGAAG	FBgn0026598	Apc2
CFDlib01231	AGCAGGCAGAGTTGGTTAGA	TTCGATCTTGATCACACACA	FBgn0038686
CFDlib01232	CAGTATCTGGCGCTGGAACT	GATGCAAACGTACAAACTGG	FBgn0003206	Ras64B
CFDlib01234	CTGACCAAGCCGATGATCAT	AATTTAACAGCTGTTCTCCA	FBgn0022359	Sodh-2
CFDlib01235	AGGTCTTGTGAGAGATCCTG	ACACCTTCAGCTCTACATTT	FBgn0267106
CFDlib01241	CGGAAGCGGCGGCGTGTATG	GGGCGTGGCTGTCATCAGCA	FBgn0051814
CFDlib01242	TTAGGTACGACTAAACGAAC	TAAGCCGAACTGCCAGAAAG	FBgn0024841	Pcd
CFDlib01243	CCATCGTGGTGACCTCCGTT	TTCGTGCGTCAAATATCTGA	FBgn0027865	Tsp96F
CFDlib01246	GGCCTTTAAACAGAACGGGT	CCAGAACATAAGTGACGAGA	FBgn0263316	Mrp4
CFDlib01248	GGTGCAAACGTCGTCCAGTG	GGTAGCTTCTGGACATTCGC	FBgn0003391	shg
CFDlib01250	TTGCTAGTGCCAGAAGAACC	GAGCCACATTGACGGTAAGT	FBgn0020429	GluRIIB
CFDlib01251	ATGCTATCGGTACAGACGGC	CAATAGTATTAGCAGTAATG	FBgn0036576
CFDlib01252	CGATCGTGACAGTTCCTCAG	CGTGATTCCAAGCTGGAAAT	FBgn0266756	btsz
CFDlib01253	GTCCAACGCGGATAAGATGC	ACCGGATATAGCTTCGGCTA	FBgn0024987	ssx		Second sgRNA also present in CFDlib00981
CFDlib01254	GCCAACGCGCGTAGAGGATT	ATCTGGTTCCGGTGTGTACA	FBgn0001208	Hn
CFDlib01255	ATGCAGGTTTGCAAACAGAT	TGTGGAGCGCTGTTGCGACA	FBgn0036897
CFDlib01256	GCGTTCATCTTCCGTAAATA	GTATATAAGGCAAGCAAGTC	FBgn0039927
CFDlib01259	AATCTAACAGCGGAGTGGGC	TATTGTGAGCCTGCATTTAG	FBgn0000119	arr
CFDlib01261	TTGTCCTCCGGCTCGTACCC	TGGGCCCGCCATCGCAATCT	FBgn0052808
CFDlib01264	TACAAACATCACGTTCGTTG	TTGGCCTCTACTTCGGGAAT	FBgn0037005
CFDlib01265	CGCTGCGACAGCTCTCAATC	TGCGGAATCGTATGCCATCA	FBgn0021847	l(2)k14710
CFDlib01267	TTCTTCGGGAAGATGTTCGG	GGCTCTCTTGAGGGCATCCG	FBgn0086656	shrb
CFDlib01269	CGTGCCGATAGTCTAGTTCC	CAATAACTACTGGGTGATGC	FBgn0263239	dar1
CFDlib01270	GTTTCCGGATTCCCGATGGA	GTGTGGGCTGAGCGGGATCT	FBgn0026597	Axn
CFDlib01275	TCCTTGTCTACTAACACAGT	CGGTATAAATGGAACTTCTG	FBgn0262124	uex
CFDlib01277	TCGAGATGAGGTGTCAGGAC	GCGGCCGCACAACTTCATGG	FBgn0044050	Ilp3
CFDlib01278	AAGATGCGGGCAAACTCCGT	GGAGACGACAGGCCTGCCAG	FBgn0035636	Cralbp
CFDlib01281	GGTTGCGTATAGTTGAAAGC	ACAGCTCCCTGGGCTTCAAA	FBgn0020880
CFDlib01282	GCTCTGTGGTAATCCCAAGC	TGCTCATCCAGTTCCGAGCC	FBgn0023096	btv
CFDlib01283	CTGTACTCCCTGGGCCTCGG	TTGCCATTAGCCCTTCACCC	FBgn0037911
CFDlib01284	CAGGTACGAATCGGCTAGCA	GGAGCTTGTCGTGCAGAAAG	FBgn0010383	Cyp18a1
CFDlib01285	GAAGTTGTCCATGCTGAAAT	GCATGCTCTAGAAGTCATAA	FBgn0028552	gammaSnap1
CFDlib01286	CCTCCGCTTTCTCATTTAGG	CCCGCGTCGTGTGCAGAAAG	FBgn0029863
CFDlib01287	AACGGGTATAAGAATACCCT	TGCCAGATACTCACCCTGTT	FBgn0037442	godzilla
CFDlib01289	ATCCTTTAAGCGGTACAATG	CTCCCAAGTGCCGTCGTCCG	FBgn0051690
CFDlib01291	GATCTCCAAGTTTAATGAGC	CCTGCTCCTGCCCATAATCC	FBgn0015774	NetB		Last sgRNA also in HD_CFD975!
CFDlib01292	AACAATGCCATTCTGCCAAC	CGAGTATCTCGAATTGCGTG	FBgn0010238	Lac
CFDlib01293	CTGACGGCTCTTCTTCGAGG	TGGCTGGCGTTAAGTTCATG	FBgn0039338	XNP
CFDlib01294	GGATGTAGCCATCAAGGTCA	CATACTCCACCTGATAGAGG	FBgn0261395	Prosalpha3T
CFDlib01297	TTTCGTGGGCAGCTTTCGCT	AATAACCACAGCTATCTATT	FBgn0035245	GC
CFDlib01300	CCATTCGCAAATACAAGGGT	AGCTTCCCGTTGCATAGCCA	FBgn0086347	Myo31DF
CFDlib01302	CAGTTCTGAGGTCAGCACAT	ATTGGTATATTCCTTAGCAA	FBgn0261394	Prosalpha3
CFDlib01303	TGGCAGGCGGATCCGTCGCA	CTGCTGCGGTTGATCCTTCA	FBgn0263392	Tet
CFDlib01304	TGTATACTAACAGCCATTAC	TTCGCATGCTGGCGTCGCAA	FBgn0032945
CFDlib01306	AGCACCCATGTTAGGACCTG	CATGGACACCGCCGGAGACA	FBgn0265193	Atf-2
CFDlib01307	CCTGGTACTCCTGCATGAGC	ACACTTGACGGACGACAAGA	FBgn0052260
CFDlib01309	CAATCTGAATGGTGCATATC	AACTATACTTCTTGTACGTC	FBgn0034160
CFDlib01310	TGATAGTGATCCGTATCACC	AATTTCACGCCTCTTCCAAG	FBgn0051812
CFDlib01312	CAGTGTCCGGAGAACTACTA	TCGTCGATAAGGAGAACGAA	FBgn0029167	Hml
CFDlib01313	CAGCCACAGATAATGGAGGC	CCACCGCTGTGAGATCCAAT	FBgn0042101
CFDlib01315	ATGTGGACACCTTCTACGCG	CCAATGCTCCGAGGCGTAAT	FBgn0036977
CFDlib01316	ATGGATCACATTTATAATAT	ACTTGTAATTCTAAGTCAGC	FBgn0058160
CFDlib01318	AATCTGGATAGGGAGTCGTC	TATTATTGGCCGCGGTGTAT	FBgn0000244	by
CFDlib01319	ATTGGTGATACGAAAGTGTG	TTGCTCGCCGTTGTAATAAA	FBgn0037520
CFDlib01321	ACATTGTAAATCAATTCGAG	AATGCATACGAAGCATCTAG	FBgn0028422	GluRIID
CFDlib01322	AATCCGCAGGCGCCCAGCAA	TGGCGGCGGAGTAGACACAC	FBgn0260400	elav
CFDlib01325	CAATCAGCACGTACAGCATG	CGAAGCATTCAGGTGCTGCA	FBgn0029114	Tollo
CFDlib01327	CGCATCTTCTATCCGGGCTG	GCCGAGGATCACAGTATGGA	FBgn0035581	Dnah3
CFDlib01328	CACCGCTTCCGAGGATGTTT	CTCAGAGGCAGTAGTAGATA	FBgn0051361	dpr17
CFDlib01329	GGACTCCTACCAGCAACAGG	CGACATGTCCATCGGCTGTG	FBgn0265605	Ric
CFDlib01333	TTAGAGGACCTGCGCTTCCG	CTGGCGTACCGGGTGCTCAG	FBgn0038467	AdSL
CFDlib01335	ACGCGCGGTAATAACTTCGG	TCGCGGTTGCGCCAGCGTGA	FBgn0014388	sty
CFDlib01336	AAATCTATTGCGAGCGAGTC	GATGATGCATTTCGACTCCC	FBgn0267002	unc-104
CFDlib01337	TGCTTCTTAACTAATTCCTG	GAAATTTCTGGATCATGGAC	FBgn0051076
CFDlib01338	TGAAACGGATCTCCAGGTAC	AATGACCCTCGTCCGGCCAT	FBgn0265002
CFDlib01339	AAGGAACTCCGCCTTCGAGC	AGGAACACGAATTGTCGACG	FBgn0026374	Rhp
CFDlib01340	GATTTCGAAGCTAGAGCAGT	CTACCTTAAGCGCAAGGAAA	FBgn0035812
CFDlib01341	GTTGCAGGGAAGGTGAGAGG	AATGTTCTGATAAGTTATAA	FBgn0004919	gol
CFDlib01342	CATTGTCGATGCTGAATTCG	CAGCGCAATCGATCATGTGC	FBgn0035793
CFDlib01343	TTTAATGTAGAGATCTCTCA	GCGACTAGTAGGATGGGTGC	FBgn0025806
CFDlib01345	GTGCTGGAATACTGTAACGG	GATTCGGCCTAGTGATCCAT	FBgn0024222	IKKbeta
CFDlib01346	TACTTACTGCTGCGTCGCGT	CACATGAATGTTCAGACCTG	FBgn0016696	Pitslre
CFDlib01347	GTGCAGTTCACTGTAGGAGT	GGAGGGCGCCTCAGGAGATT	FBgn0004839	otk
CFDlib01348	CAGCACGGACGACCTTAAGC	CGTCGTGGGACATCATCTTG	FBgn0024227	aurB
CFDlib01349	AATGCCAACGATCCCATCTC	ACTGCCGCGATGAATGTGGG	FBgn0015402	ksr
CFDlib01350	TCGTGACGACCTGGAGTCCC	CAGTGTTGATCGTGGTGCCC	FBgn0002413	dco
CFDlib01352	GCAGAGGGACTACTTGGAGC	GGCACCGCACTTTGCCGAGA	FBgn0286813	SRPK
CFDlib01353	CTGCAAGATGACGACGGAGA	GCACCAATGCGCTCCGGCTC	FBgn0010355	Taf1
CFDlib01355	TTCCGCCGTGTATTTATCAT	TGCTTGGCGTGGTGATAGTC	FBgn0011739	wts
CFDlib01356	GTTGCCTCCGTATTTACCGG	CGATGCGCTGACAGAGACGC	FBgn0010269	Dsor1
CFDlib01357	CATCTCTGTGATGTAGAACT	GAGTTCGGCGAGGACACGGA	FBgn0023081	gek
CFDlib01358	GAGCTATGTGGTTTGCGATG	CTCGAGAAGCTACATTAGAG	FBgn0025936	Eph
CFDlib01359	CACGTAGTCGTCCGTCAGTG	CCGCCGTTCTACAGCAACCA	FBgn0013987	MAPk-Ak2
CFDlib01360	GGATCCCTCCGTATTCAGTT	GGTTCTCAATAAGATAACGG	FBgn0020412	JIL-1
CFDlib01361	GCAGCCGTACGACCATCATG	CGTATACAAGGCGACACGCA	FBgn0001079	fu
CFDlib01362	GATGAAGTACCATTCGCACG	TGTATGGAACTTTGTTACCG	FBgn0005640	Eip63E
CFDlib01363	CTGGGCATGAGCATCCAGAG	TCAATCGCGGCGTACTGCCA	FBgn0015024	CkIalpha
CFDlib01364	TGAAACGTAAAGACTGCTGT	CAAGTGTAGCATCATACACA	FBgn0025702	Srpk79D
CFDlib01367	GGAACAGACTCAGGTCGTAA	ACGACTCTCGGTCAGGGTAT	FBgn0010379	Akt1
CFDlib01368	ATCTGAGGTAGTGATGTAGG	GCCAACGCTAAGAAGCGCCC	FBgn0027101	Dyrk3
CFDlib01369	GCACTTCACGGGAATGCCAA	CACCTACGGCACGGTGTTCA	FBgn0013762	Cdk5
CFDlib01370	GATGGACGCTAATCTCTGCC	ATTAATGTACCGACTGTGGA	FBgn0000229	bsk
CFDlib01371	CGAGAACAAGATCATCTACC	AGTTCCCGCAGCCCGCCCAA	FBgn0020621	Pkn
CFDlib01372	GTATTACATCCACAGCAACA	ATCGCGCACGATGTCCCTGA	FBgn0019949	Cdk9
CFDlib01374	GGATTAGCAGAGCCTGATGA	CGACACAACGGAAGGATATG	FBgn0004367	mei-41
CFDlib01375	TCCAGTGAACAGTTGACCGA	ATGAGCTCAAAGATGCCAGC	FBgn0010909	msn
CFDlib01376	TGGAACCACCACTCAAGCGC	TGCTGAGGACATGCGTCTGT	FBgn0027504
CFDlib01377	ATCGTCCTCTCCGGTGCGCG	GCAAGCTGAACATCAACGGG	FBgn0010303	hep
CFDlib01378	ACTGATGTTCGTGTCGTGCA	TCGGCGAAGCGGAGCTTGCG	FBgn0011737	Wee1
CFDlib01382	CGCGGATCGGGTTTACTTTG	ACGCATTTATGCGGTCGTTG	FBgn0037856	Leash		second sgRNA also present in CFDlib00996
CFDlib01386	TTGGAAGTGGTGTACATCTA	TCCGATACCAATAACTCATG	FBgn0031975	Tg
CFDlib01387	TCGGGACTCACAGGTCGCAT	CTTTGGGTCGAGAGTTCTCA	FBgn0039107
CFDlib01389	CAATGTGAAAACAATATCGT	CGAGTCTCATATAAGATTTG	FBgn0040056
CFDlib01391	AGCAGTGCGGAGCAGCCCTC	CCGCCAGTTGAGCTTCATCG	FBgn0037623
CFDlib01392	AGACCTCTCCATGAGTCGGC	CAGTGGTCAGTATCAGCCCG	FBgn0036368
CFDlib01393	TCAGTATATCCTCGTCCGAG	GTTGCCGTGGTACCATTTCA	FBgn0015295	Shark		1st sgRNA also present in CFDlib01373.
CFDlib01394	TCAAGAATATAATGTTCGTG	GTGTACACGCGAGCCGCACT	FBgn0264492	CkIIalpha
CFDlib01399	TCACCGGTGGGAAACTCCGG	GAACAGATAGCACCCGTTTG	FBgn0031643
CFDlib01400	AGTGCATCAAGTCGCAGGAT	ATCGCTGGGTCCAGATCGCG	FBgn0265045	Strn-Mlck
CFDlib01401	AGTTGCCGATTCGCACTTCG	GTACCTGGCTGTTCCCGTCA	FBgn0030384
CFDlib01402	ATCCTTCGGAGACATCTACG	GCAGTCCCGGCGGGACGACT	FBgn0031441
CFDlib01403	CCTGCACCACGCAACCTCAA	TTAATAGATCTGCCTCCTCT	FBgn0037098	Wnk
CFDlib01404	TGGGACGCCACGATGATCTG	CGGCTTTGGAGAGATATACG	FBgn0039908	Asator
CFDlib01405	GGCGATTTCTTGGGCGGTAC	GGGGGATCGATCTCAGAGAT	FBgn0044826	Pak3
CFDlib01406	AATGGAGCCTATGAAGTCAA	CGTGGTGCTTACAGATTGGC	FBgn0250823	gish
CFDlib01410	CCATGGCGTTCTGCCGCGCG	ATTGTCATGGAATTGGTGCT	FBgn0000723	FER
CFDlib01412	CAGTGCGTCCAGCGATGCTG	CCGAACATCATCGCTCTGCA	FBgn0026323	Tak1
CFDlib01413	GCTGCAGCATTTGTTGCCCA	GCGGGATTTATAGTCGTACA	FBgn0262733	Src64B
CFDlib01414	TTCCGGGTAATGGGCGCCTG	GCAGCCCTTCACCGAGTCCG	FBgn0013435	Cdc2rk
CFDlib01418	CGGGTGTGCTTCCTGCGGAA	GGATGAGCGCTATATGTACA	FBgn0039083
CFDlib01419	AACTGTGTCGGCACAACTGG	TTTCGGCGCGGCTTGCAGCA	FBgn0053519	Unc-89
CFDlib01420	TTCTTGCTTGCCCTCGCAGC	TACACTCGCAACAGCATGTT	FBgn0260798	Gprk1
CFDlib01422	CCACTGGGCCTTGACCTGAG	ACCCTTGCGATAACGACCGC	FBgn0000658	fj
CFDlib01423	AATAGGAGTGCTCACCGAGC	CTGCGAACGGCAGTGATCTC	FBgn0038816	Lrrk
CFDlib01424	CACTATGCCTTCCAAACTCC	TGATGTCACAGTGGTCACCG	FBgn0262866	S6kII
CFDlib01425	ATTCTGTGCGGGGAACCCTA	GACCACGCCAAAGGCTCCCT	FBgn0283473	S6KL
CFDlib01426	TCTGCGGGGACATCTGCAAA	AGGCGAGATGGGCTACTTGT	FBgn0283657	Tlk
CFDlib01427	TCCACGGACGAATCACTAAC	CCATCACCTCGCCGCTCTGA	FBgn0283712	LIMK1
CFDlib01428	GCGGACCTGGGATGCGATTA	GGAAGATGCACCGGCCCTCC	FBgn0285896	btl
CFDlib01431	TATGATCTGGAGGAGACACT	GTCGCCCAGCAGGATCTCTG	FBgn0033915
CFDlib01432	TGGAGCCTCCGGCGCCCGAA	CAGCCAGCGACCTCGGAGCT	FBgn0259680	Pkcdelta
CFDlib01433	AGCTTCACGCGCGTAAAGTC	CGACCCGTGCTGGTGCTCGT	FBgn0031855
CFDlib01435	CAAGCTATCCTTCCTCGGCG	ATTGGGCGAACCGAAGGACT	FBgn0263237	Cdk7
CFDlib01436	TCCCTCTGAGCTCGCTCCCG	TGGCTCACCGGTAAGCCATT	FBgn0264087	Slob
CFDlib01437	CAGGTTCATCTGCCTGGTTG	GAAAGCAACTGCGCAATGGC	FBgn0040505	Alk
CFDlib01438	CGCCCATGCAATTAAGTAAT	ACCACCATGGAATTGACGAC	FBgn0035397
CFDlib01439	AATAATAAGACCGATATGCA	CAAGCAAGTGGATTTTGCGG	FBgn0046689	Takl1
CFDlib01440	ATCGACGCGGTGCTCGACGC	TGGTGGAGCTACGACGCACA	FBgn0261854	aPKC
CFDlib01442	CCGCCTGACGGGCCAAATTG	GCGAATCCATGTATTTCTTG	FBgn0004106	Cdk1
CFDlib01443	CTCCAGGTCGAACAGTTCGC	GGTCCCAGCTTGATTTTACC	FBgn0283472	S6k
CFDlib01445	AACACTAGAGTCAATGTTAT	CCTCCTAATCGTTTATCGCA	FBgn0046706	Haspin
CFDlib01447	CACGCCCACTCCGACTCCGA	GCGGAGCAAGAAGACACGTT	FBgn0264959	Src42A
CFDlib01455	ACATCGCGCATGGGAAACGC	GATGACTCAGAGCCGGAAGG	FBgn0259678	sqa
CFDlib01456	GCAGTAGCAGGTTAGGGAGC	ATGGCCGCCGCCGCTTTGAG	FBgn0003716	tkv
CFDlib01458	GCTTTCTGGCTGCGATCTGG	CATCCACTCTGGAGCGCGCA	FBgn0083970
CFDlib01468	TGCGTTCCCGGGCATTTCTC	GTAATAGCCGATTTAAGCAA	FBgn0000022	ac
CFDlib01469	TCTTACGGAGTAAATTTAAT	AAGCGGCAAGCGAATCAATA	FBgn0033389	Rad51D
CFDlib01473	TGATTCGCAACCAGAATAGT	AAACATCGAATATATAACGT	FBgn0032424
CFDlib01474	CTTTCCGTTCGAGCCGTACC	GTCCTCAATGTCCATGATGG	FBgn0029798
CFDlib01475	GATGAGCAGCAAAGTACCAT	GACTGATGGCGCACAGGCTG	FBgn0038541	TyrRII
CFDlib01476	AACCGCTGCCAGGATGAGAA	GCACACGTTCCGTATGTCGA	FBgn0031149	Stt3A
CFDlib01477	TTGCAACTTCATCCGCCGTG	CCGTGCCAGGACATCAATGT	FBgn0038157
CFDlib01483	GCAACGATTGGAATCTTACA	ATCAGGTATGCTTTGGCAGC	FBgn0032083
CFDlib01484	CAAGACCCAGCTACAAATTT	GCACACTACGGCATTGTTCT	FBgn0010315	CycD
CFDlib01485	GGTGTCCCGCATGTCCCTGG	AATGCGTGCATATTCGCTTA	FBgn0019968	Khc-73
CFDlib01488	GGAATGGGCTTGAAGGCAAT	TCCAATCTTAGCCTGCCGTC	FBgn0030077
CFDlib01489	CTGGTCGAGATCGGAGAATT	CCTCTTCTGCATCGTGTTCA	FBgn0033809
CFDlib01490	AACGCCACCTTCTCGTATTT	TACCTGTTTGCGTACAACGC	FBgn0032394
CFDlib01491	TAGCGAGTTACGCAGCTCGG	TGGCGATCGTTGTCGAGCAG	FBgn0037084	Syx6
CFDlib01492	TGATGCGCTCATACTCAATC	TACCGGTATCCGGACGGAAA	FBgn0030361
CFDlib01493	CAGCTCTCAAATAGCAGAGC	GGCAGCGCCTCGGGCCACAG	FBgn0000166	bcd
CFDlib01496	AACTACTCGATGAGTAGCAT	GTCCACGCTGACCGGGACGC	FBgn0004101	bs
CFDlib01498	CCTCACGCGCGAACTGGACC	TGCTGAACGAATCCGCAGCT	FBgn0000183	BicD
CFDlib01499	AAGTATGTGCCCGGTGGATC	CGGCTGACGCGGAGATCCAC	FBgn0035481
CFDlib01500	CAAGAGGCAGCGTAACCGTG	CGACTGAAAGTCCAGTGACA	FBgn0001291	Jra
CFDlib01501	TCGATGGACAGTTAGGTAGT	ACTTTGGCGGACGACGATCT	FBgn0030005
CFDlib01503	TGAGAATCCCTACGAACTGA	TCGGAGGGCATGAGATCCCA	FBgn0034842	Prosbeta5R1
CFDlib01504	CGTCTGCCAGGTCACTTTGA	ATCCTTATCCTTTGGATCGC	FBgn0034085	Ptp52F
CFDlib01505	CAACATCAGGTTCACCTCAG	CGATGACCGCAGCGTATCAT	FBgn0003459	stwl
CFDlib01506	TCGGTGCAGACCTTGTTATC	TCGATGGCAGTTCTGGTCCA	FBgn0035929
CFDlib01509	TCTGCGACAACTGGCGACCC	TTGACCCTCACAATAGCAGC	FBgn0036367
CFDlib01510	CTCGCGCTACAGAAATTCTC	CACGCTTGCCGATAGTTGCT	FBgn0027492	wdb
CFDlib01514	TGTCTCTTCACCAACCAAGG	TTTAAGGGTGCATATCCTGG	FBgn0037578
CFDlib01515	CCGCGAAGCTGTAAGCAACC	TAGCTTCATAACTAAATATC	FBgn0037623
CFDlib01516	CTGGTGGGCAATGCTGGTGT	GCCGCCCAGCGTCAGTCGGA	FBgn0031882	Rab30
CFDlib01517	GCTCTCATCCTCATGTTGAA	CCACGTGATAGGCTTCTCAT	FBgn0032612
CFDlib01519	GTGGCCTCCACTGCTACGCA	AGTATTCGACGATGTGGCTC	FBgn0011584	Trp1
CFDlib01520	TGTGCAGGACACCCTACAGG	AGGCCGCGCCTTCCATATCA	FBgn0037677
CFDlib01521	ACCAAATCCATAAGCGTGTC	CGATAACGGTGGCCATGGTA	FBgn0026439	Eaat1
CFDlib01522	TATGTGGCGCGTTCGCACTT	CGCCGATATGTGTCCGGAAA	FBgn0028974	xmas-2
CFDlib01523	CTGCGGCCTGGGCACCCTTC	GCAGGTTGTCGTACTTCAGG	FBgn0001970	Pgant35A
CFDlib01525	CCGTACATATTTAGGTCCGC	GGACAGCGAGAGCCAGCCCT	FBgn0034959
CFDlib01527	AAGGACACCATCCTTAGTTC	CTTGAAGATGATGCGACCCA	FBgn0037996
CFDlib01528	AAGGAACAGCTCAGCCAGAC	TGTGGAGCCTGCGGCGGGCT	FBgn0010452	trn
CFDlib01529	TCACATTCGTCGCCACCTGT	GTTGTCGCCGTCCAACCCGT	FBgn0020389	Papss
CFDlib01530	TTGGGTGCCTCCGACAATAA	TCCCGAAACTGAGAACACGT	FBgn0003607	Su(var)205
CFDlib01533	TCTGTCGGATGAGGTCGCGC	ATCTCGGGCCATCTCCGGTG	FBgn0030089	AP-1gamma
CFDlib01534	TGCGGACGCCGAAGTGCGCC	CAAAGATGTACGGATTGGAA	FBgn0030477	dmrt11E
CFDlib01536	TGCGGATACCTGCCAGACAC	AAACACGGGAGAATCATGCT	FBgn0035968	Slc45-1
CFDlib01537	AAAGCGCGTAGCAACTCCAC	CATCAGATATTAGATGCCGT	FBgn0004107	Cdk2
CFDlib01538	AGCACTGGAGGCTGTACCGC	AGTTCCAAGCACCAGCTCTG	FBgn0038258
CFDlib01539	CGAAGGAAGCAACGAAGCCA	TCTGGTCCTTGTGGATCCTT	FBgn0036395
CFDlib01540	GTATGTAGTCCTCATCCACC	TCTTAACCATTGCCTCGCCG	FBgn0000259	CkIIbeta
CFDlib01547	TGTTTAGAAACCTCCGGCAG	ACACTCGCGGTAGATTTGCT	FBgn0036754
CFDlib01548	GATGATCGACGAGATGCCTG	GAATATTTGATAAATCCTGC	FBgn0003482	spn-D
CFDlib01551	GGATCATCCCAACGCCAATG	ATGTGGGACTTTGACATCCA	FBgn0035227	Iml1
CFDlib01553	GTTGCTCAATTCGGAAGATC	TCGCATCCAAAGGATGTCCA	FBgn0035687
CFDlib01554	GCTGCAACAGCCTTGGCTCC	GGTGCTTCAATTTCCCTCAA	FBgn0024913	Actbeta
CFDlib01555	CATCCTGCTGACCTTTGTCC	CGTTCAATGGACAAACCGCG	FBgn0030465
CFDlib01556	CGCCCAGAAGATTCCCATAA	AATCAGCATCCCAAGGTCTT	FBgn0037481	MAGE
CFDlib01558	CAGACCATTTGGCTCGGATG	GGCATTGAACTCTTTATCGT	FBgn0037989	ATP8B
CFDlib01560	CACCGCCCGGCTCCACAATA	AGCAGGCGGTCAGCAAAGTC	FBgn0030569
CFDlib01562	CTTCATGGTTTGGAGCCAGA	TGGAACCGTTGGCACTGTTC	FBgn0005612	Sox14
CFDlib01563	TCATCAGCAATCTCTGGAAT	GCGGTCGCCGACCTTCAGTG	FBgn0024289	Sodh-1
CFDlib01566	TGATGTGGACGATAGCGTGA	AGATTCATGTCCATGGCACT	FBgn0034326
CFDlib01568	TGCCGACCATCCAGGATTCA	CAAGGGACTTCCCTGCTTGA	FBgn0035187	Trh
CFDlib01572	CTTCGCTTTGCCGAACACCT	CTGAGATCAATACGAATACG	FBgn0038206	twf
CFDlib01573	GTCTGCCCGTCTCGGCACTC	TCACCTTTCTGCGGTGGCAA	FBgn0038468
CFDlib01574	TCATCCGCTGACCCACGACC	CGAGGAGCGGATTATCCAGC	FBgn0032378	CycY
CFDlib01575	CGCCTTCAACGGATTTACCG	GGCCGCAGAGATGGTGTTCA	FBgn0010516	wal
CFDlib01576	CAACTCGCGCATTGCTTTAA	GGGATAATAACCATTGTTAC	FBgn0035934	TrpA1
CFDlib01577	TACCATAATGTAGTGATTAA	AGTGCCAAGGCAACAAGGAC	FBgn0024734	PRL-1
CFDlib01578	CTGGACTTAGAGCTGTCGGA	GGCGTCATTGTGTCCAGCGA	FBgn0024806	DIP2
CFDlib01580	TGCCGCAGCAGTACTGCCTA	CGCTCCCGTGGAGCACTTTC	FBgn0029824
CFDlib01581	ACGCATCAAGGCTGTAGTTT	CAGTATCTCGTCAAAGTCCA	FBgn0038261
CFDlib01583	ATGTCGTAACTGTCGTCGAT	CGCGGCGACAGTGGACCTTA	FBgn0000299	Col4a1
CFDlib01584	CGAAGAGAAGATCAGTAATC	ACATATCAGCCATGTCGTCT	FBgn0036740	Vps60
CFDlib01585	TTGGTATTCATCCTCGTTAA	TTGTAAATCTGTACGAGTTG	FBgn0004597	CycC
CFDlib01586	AACCGGACCGCACGGCATGC	CAGCAGCAACGTCCGCCCAT	FBgn0030034
CFDlib01587	CAAGTACATCGAGTCGCACG	CATTGATTCCACGTACTACT	FBgn0022936	CycH
CFDlib01590	TGCGAAAGGCTCTTCATGGA	TAGTACGGATTTCCTATCGA	FBgn0027544
CFDlib01593	AATGTCACCGCAATCTCCTC	AATTTGCGGGTACATCTTTG	FBgn0033458
CFDlib01594	AATATGGATCGTGCTCGGCC	GTATTTCATACTGCCTACCA	FBgn0001185	her
CFDlib01595	TTTGCCGATGAGCGACGGGA	ATCGTCGCATTGGCTAAGAC	FBgn0030661
CFDlib01596	CTACCACGTACTCAAGGTAC	GGCGAGGGAGCTCTGGGCTG	FBgn0036919	Grasp65
CFDlib01597	TGGCAGAACGAAGCACCAGA	ACGTTGACCATCGAGAGTCC	FBgn0026760	Tehao
CFDlib01598	TCAGTCCGAACTTAACCTCC	GAATGAAACGGAATACGGCG	FBgn0032151	nAChRalpha6
CFDlib01599	CCCAAGCCACCCAACTCACG	AGTTTGTCATCGCGATGCGA	FBgn0003480	spn-B
CFDlib01600	CTGGCTGAGTGGGCTGGGTG	GGTCCATGCTCATCAGTTCC	FBgn0003525	stg
CFDlib01601	CGCAGGATCGGGTCCGCCAA	GCGTCCAAAGAGGCGATCGC	FBgn0003415	skd
CFDlib01602	AGCGGATTCTGTTGCAGCTC	GCGAAAGGCGAAGCGCAACT	FBgn0015614	CanB2
CFDlib01605	TTTGGCTTTACTCAATGCCT	ACTTCTCAAATAACTGCTAA	FBgn0016919	nompB
CFDlib01607	CGTTGGACTGCTGAACTCCT	GTGATCCAGCCAGCGGAATT	FBgn0034382
CFDlib01609	TGAGACGGACGATACGCTTG	TCTGAATCTGACTCCTCAGA	FBgn0030206
CFDlib01611	TGGATCTTCCCTTGATGGTC	CGACAAGAATGAGTTTATGA	FBgn0026634	ldlCp
CFDlib01612	TTGACGCCAGCCATCGGCAG	GACATTGCACTGATCACAGG	FBgn0032910
CFDlib01613	AGCAGTTCGCACTTTGTCGA	ACGAGATGGAGACTTCTCGC	FBgn0037371	Sym
CFDlib01614	ACCGCTGCAAGCACGCCCAC	CAGGGCTGTGCACGCATCCG	FBgn0020496	CtBP
CFDlib01615	CAGTTCGTGCCCTTCATCTG	CAATTAAATCGTGGAAGGCG	FBgn0016698	Ptpa
CFDlib01617	TTGCCCATCATGCCGCTGTT	CTGCTCCACGCCGACTGTTG	FBgn0026160	tna
CFDlib01618	CTCCGGAGCACGATAAAGCC	GTGCTGATCACTGAGTTCTT	FBgn0028410	Pk34A
CFDlib01619	TACGGCTACACAAATATTCT	AAGGTGGCCATCAGCAGGGA	FBgn0038715
CFDlib01621	TATTCTGAAGCAGAAATTCG	GCCGTACTCCTGGACTACGA	FBgn0031907
CFDlib01622	CGGCCATCGGTGCGCACCCT	AGTTTGGGAGTAGTAGTGCA	FBgn0038716
CFDlib01623	ATCATCAATGGCATCAACCT	AAACCCGTCTCTCGGGAATC	FBgn0031902	Wnt6
CFDlib01627	TGGCAAGTTTCGTACGGAGA	TGGGCATGGAGCTGAACGAG	FBgn0029890
CFDlib01628	GTGCCGCTGTGCAATGATTG	CAAGTGCCATTCGTGCAGGG	FBgn0028939	NimC2
CFDlib01629	CATCGAGTATATCGAGAGCC	CAGCCGACACATCCTGGATA	FBgn0002922	nau
CFDlib01631	ACCTCCAATGCCGTGTCCTC	CACAAACGATCTGAACATCG	FBgn0036043
CFDlib01632	CAGTAGCAGTTCGGAGCACG	CAAAGAGGGCGCCCAGAAGC	FBgn0030158
CFDlib01633	CTCTCGACGCTTCGAATTGC	GGAAACCAGGGCGTCACAAA	FBgn0004619	GluRIA
CFDlib01634	GGACCATGCGGATCGATTGC	GGTGCAACTAGATTCGATAG	FBgn0031634	Ir25a
CFDlib01636	GAGCTCCTGCGAAATCGACG	CTACAACAAACTGGTACGAC	FBgn0015519	nAChRalpha3
CFDlib01637	CCGTTTAGTCGTGCTTTGTC	GCTGCTTTCGTATTGCTCCT	FBgn0013997	Nrx-IV
CFDlib01638	TGCCGAAGTGCGTCTTGAAC	GCTGATAGTTCCTCTGGCAG	FBgn0030749	AnxB11
CFDlib01639	AATCTCTGCATCTCGTGTAT	GGCGTCCGTCGAAGATCTCG	FBgn0030346
CFDlib01640	CTGGCGGGTGAGAAGGAACA	GAACGACGTCAAGGTCACAA	FBgn0035392
CFDlib01642	GCACGGCCACCTTCAATCCC	ATCCGCAAGCTACGTGCTGA	FBgn0027572
CFDlib01643	ATTTATCTCCAACGATCCGC	CACGTTCCAGCAGCGCTCCG	FBgn0038279	Sdr
CFDlib01644	CTTCACGTTTAGGCGGCGGG	CGAGCTGGAGCGGGATAGCA	FBgn0038065	Snx3
CFDlib01645	GCGCATGAACGTGGTGCTCG	GATCGCGGACAACCGCATTT	FBgn0031813
CFDlib01646	TGGCATCGATCCGTTTCACC	GCACCAATTGCGACATTCCA	FBgn0028833	Dak1
CFDlib01648	TGCTTACGTTCCGGTTTACG	GCGTGGCGTATCCAATGTGA	FBgn0004367	mei-41
CFDlib01653	ACCGAGTTCTGTGGCACGGC	CACACGCGATGCCGATGGTC	FBgn0003317	sax
CFDlib01654	GTCATTGTACACCTCCGACA	GATCAAGCTAAGCGATTCCA	FBgn0034282	Mapmodulin
CFDlib01655	CAGCTCGCTGCGCGAGTACT	TTTCAGGGCCAGCGACGTTT	FBgn0027095	Manf
CFDlib01656	AAGTAAAGAGTCTAGCAAAG	AGTGCAAGCTATCATCCGAT	FBgn0035453
CFDlib01657	GCCTGTCGCCAAACAGGGCA	TTGCAGCGGAGTCTCCTGCA	FBgn0002673	twe
CFDlib01658	TTTCGCATTGCCGGAAGGCG	GGACATACTGTTCACACCGG	FBgn0027342	fz4
CFDlib01661	GACACCCTGATGGTCAATTG	TCCTCCGGGAATTGTCATAA	FBgn0023095	caps
CFDlib01662	TCTGGTAGTGGATGTACGCA	TACCAGACGATTGAGTTCGA	FBgn0032345
CFDlib01663	CATCTATGTGAAAGGTGATG	TTTCAGTACTAGCATTGGAT	FBgn0031804
CFDlib01664	GGTGCTTGTGGTAGTCGTAC	GTAGACGACTCTTTAGGCTT	FBgn0029639
CFDlib01665	CCTGTGCCTTCCACGCATAT	GGAAGCTGCGGTCGCACACC	FBgn0033778
CFDlib01666	TCACTTATTCGCCGCCAAAT	AGAAGAACAGCGTGTTGATC	FBgn0033206	DCTN4-p62
CFDlib01667	TTGATGAGCACATTTAGTTT	CGTATGCATGCCGCTTACGG	FBgn0027872	rdgBbeta
CFDlib01668	ACACATCGGAACAGGCGGTG	ACCCTCACCTGTTTATCAAG	FBgn0023525
CFDlib01669	CGACATGGGCATCACTCTTG	GTGATATGCGCCGAATTGTT	FBgn0034314	nopo
CFDlib01670	CAGATCGAAGGTGAATTCGA	GGTGCTGAGGAACTTCTTTA	FBgn0030341	p24-1
CFDlib01671	TCAGATCATCGTCGAAATTG	CGTTTCTCGTACGGAAAGGT	FBgn0038402	Fer2
CFDlib01672	CCCAATCCGCCGAGGGCGAG	CTTCCACATCGCAACCACCG	FBgn0033246	ACC
CFDlib01673	TGCCACCAAGAAGGACGTTG	TTAGGCTTTGAGTACACCGG	FBgn0036666	TSG101
CFDlib01674	CGCGGTGGACAAGAGTCTGG	CGCGGCTTGGAGCCCAACAA	FBgn0019890	Smg5
CFDlib01676	TTTGCGTTTCAATCACATCG	CTTGGCGCGGATGCAGCGCA	FBgn0011828	Pxn
CFDlib01678	TCTCGCGGGCTTTGGCGCAC	ATCCGGAGGACCAGACTGGC	FBgn0023177	Pp4-19C
CFDlib01679	CTGGACGGGATTGATTGTCC	AAAGAATTGAGCGATTTGCA	FBgn0026316	Ubc10
CFDlib01680	CGCCACCCGAGTTCCGATTG	TGGCCGGTGTTGACCATCCT	FBgn0037764
CFDlib01681	GATCCAAATGAAGCCCGGAT	AAATCTTTCCTCGACGACGG	FBgn0029992	Upf2
CFDlib01682	AGGTCTACACCTTCAGTGAC	AATCTGAAACTGATCGACTT	FBgn0031784
CFDlib01685	TTACCGCTAGTAGGGAAATC	GCTAGCGAGTTAAACAATCA	FBgn0032800
CFDlib01687	CAGGGACTGACTGACTCCAT	GATGCGCACGTGCAGTCCCT	FBgn0010551	Phb2
CFDlib01689	TTTAACCCATAAAGGTGGTC	GCCGTACAGCTGCCAACAAT	FBgn0029949
CFDlib01690	GCAGTCCCGGCGGGACGACT	ATCCTTCGGAGACATCTACG	FBgn0031441
CFDlib01693	GACATGATCGCGCGCAAGTT	TACATAGTGGAGAAGTTTCT	FBgn0034255	Oxp
CFDlib01694	TGCTATGGTGGTACACATGT	TCGCGGATTTGGCGGACGAA	FBgn0036128	Elo68beta
CFDlib01695	AGCACCACCGGATCCGCTGG	CCTTGATGCTCTCGGAGCTG	FBgn0010263	Rbp9
CFDlib01697	AGCAGTGGAAGGAGACGGAC	GCGAGCGAAAGGCCCGACGT	FBgn0037726
CFDlib01699	CGGAATAGGTTACCTGCAGG	TTCTTCCGGAGAAGCAACAT	FBgn0037365
CFDlib01701	CAATGAACAGGAAGTCAGGG	CCAGTCTGAGGGCTTCCATC	FBgn0033528	trsn
CFDlib01704	GGCGCCCGTCGCACAACCTC	TTCCAGAATGAGCCAATCAT	FBgn0037525
CFDlib01705	TCGGAACGAGATCTGCGCAC	ATTTATCCTAGTGGGTGATT	FBgn0038003
CFDlib01707	CGCCAGTGGCGCAGAGCAGC	AGGGCATCGGTATCTCGCTA	FBgn0030990
CFDlib01708	TGTACTATATCTGCACTATC	TCAGCACATGCTCGATCGCG	FBgn0023090	dtr
CFDlib01709	CCACAAGGTGTCTACTATGC	ATGGCGCGCTCGCTGTCGCG	FBgn0037521
CFDlib01710	CTCAGCTGGCACTCGCTCAG	CTATAGCTATCGGCCTTGGT	FBgn0015286	Rala
CFDlib01713	GCCAACGACCTTCAGGCTGC	TCCTGACACAGTTCCTCCAC	FBgn0032350
CFDlib01715	AGACTGCCGGCGTTTGTGCG	CAGCGGGCCAGCGCCCTAAT	FBgn0033744	Dh44-R2
CFDlib01716	AACATATTCATTCACATGCG	CGGTGTACAGGAACGCATCG	FBgn0037317
CFDlib01717	CCTCGTTCTCCGTGTCGTCA	CGACGCTCTAATGGACGCGG	FBgn0036624	RAF2
CFDlib01722	ATGTCTGATCCAGGAAGCGC	AAAGAATTCCAGTCTGCGCG	FBgn0024542	Neos
CFDlib01724	TATTCGGCTGAAATCAACCC	GTGACCACTCAAAGGATTAC	FBgn0037786
CFDlib01725	CTCCTTCATCACATCCATCT	GCGTGCAGGGCGTCAACTTC	FBgn0025115	Acyp
CFDlib01726	ATGAGTTGAGATATCCCATC	CCCGTCCATTTGCCCATGTT	FBgn0034383
CFDlib01728	GCTCATATAGCCGGGCGGCG	CGAGGGCAAGTGGTCAGAGA	FBgn0025800	Smox
CFDlib01730	GCCAGCGCCATGTTAGGCGC	TCCGGGTGAGATTGAGCACC	FBgn0034476	Toll-7
CFDlib01731	ATCTGGATGAGCCCGTTGTT	TAATTTAGTAGCGTGTTTGT	FBgn0036486	Msh6
CFDlib01734	GATTACGGGCACAAAGTTGA	GCATGTTCAGCAACAGCTCG	FBgn0036702
CFDlib01736	GCTGGCGTTGCTCCGCGCGC	TGTGTGCCCACCTGTCCGTT	FBgn0028542	NimB4
CFDlib01737	GTGCTGGAGCATTCCGGAGT	GTATTGGGAGAAGATCCAAG	FBgn0033971
CFDlib01739	CTTCGGCACTACCATTGAGG	ATAAAGGGATTATCCGAACT	FBgn0016975	stnB
CFDlib01740	ATTAACTACGTCCAATGCGA	GATCTACGTTGACGCGACGC	FBgn0022023	eIF3h
CFDlib01742	GTCATGTTCGTCGACCGGTT	TGTGTCCTCGATGTTGCGCG	FBgn0001297	kay
CFDlib01743	AAGATCAGCCGCATAAGACT	AGAGAGTAATCCGTTTATCA	FBgn0034612
CFDlib01745	CAGATTGACAATCACCTTGC	TACCTCATGGGTTCCGAGCA	FBgn0037517
CFDlib01746	CTGCATCCAAGTTCCTCCAG	AGTGTCCGGCCAATCTTTCT	FBgn0025802	Sbf
CFDlib01747	CAAATACTGGGCATCAATGA	AATGTGGCCGAAATCTCCAC	FBgn0000032	Acph-1
CFDlib01749	GCATACGGTCGGCGATGCCA	GTCACGATACCGTGCTCAAT	FBgn0000042	Act5C
CFDlib01752	GTTCTTTGCCAAACGCATGC	GCTCTCGGAGGGCGAGATCC	FBgn0004103	Pp1-87B
CFDlib01755	TAGATCCCTCGAAGCTGGAC	GCTGGCGGGCTGCCCACAAT	FBgn0031756
CFDlib01756	TTGTTCATCCCGTCCATTGC	ACCAGCTCCTGAATGATGAT	FBgn0261113	Xrp1
CFDlib01757	CGGTGCACTGACGCTTGGCA	TGACTGGATCTAGGAGGGAT	FBgn0002899	mus301
CFDlib01758	GTGCCTCCACTCGGTGCTCC	GGCGCCGCTATGAATATGAC	FBgn0028542	NimB4
CFDlib01759	GATTGGTTCTTCTTCATAAG	TTCCCGGGCTCCTTATCTTG	FBgn0004797	mdy
CFDlib01763	AGCGTGTACAACTCCTGGGC	GATAGCTAAGCTGCCCGAGG	FBgn0000376	crm
CFDlib01764	TATCTGAACACTCTGGGCGC	AGATGCCGTCACTGGAACCC	FBgn0028481
CFDlib01766	TGTAGCCGCGGCACGGATCA	TTCTTGGCTATCAGGCAGCG	FBgn0004880	scrt
CFDlib01767	TGGGCCAAATAATCCGCATC	GGTCTACGATATGAGCCATA	FBgn0011277	HLH4C
CFDlib01768	AACTGAGTAGGGTTTATGGT	ACTCGAGTGTCTCTCACTGC	FBgn0038418	pad
CFDlib01769	AAAGATCTGGAGCGGTGAGC	CACAACTTCATCGATCTTTA	FBgn0038730
CFDlib01770	ACCGCCAGCTCCCGATGTCT	TGGTTGCCAAACTCGATGAA	FBgn0010194	Wnt5
CFDlib01773	CACGAGCCGACGCTGCAAGC	CGCAGGATGGTCTGATAACT	FBgn0031814	retm
CFDlib01774	TCTTACGGGCATCATTGATT	ATAAGTACGAAAGGAGTATC	FBgn0037549
CFDlib01775	CGCCTCGTGATGATGGGACT	ACGTCCTCTCCGCCGGCGTT	FBgn0036661
CFDlib01776	GATATAATACGTACAGTGCC	GCTGGAAGATGTTGGCTATC	FBgn0010905	Spn
CFDlib01779	GCCTTGCTGGACGCTCGGTT	CACCATCAACACCATCGACA	FBgn0034789	PIP5K59B
CFDlib01780	ATCAGGTGGGTTTATGCCGG	ACGGCCACCGGCCTGACTGC	FBgn0015919	caup
CFDlib01782	CGGCAGCCGGTTGATGCGAA	GTGGCCGGAAGGCCCATCAT	FBgn0030465
CFDlib01783	CGCCCAGCTCTACATGATTG	AATCATCAATGAGCCGTACA	FBgn0003218	rdgB
CFDlib01784	AAGACATACGGCATTCGCTC	TGGATGAACCGCTTAACCTG	FBgn0263757	Rpb4
CFDlib01786	AATGACGTCGGACCACCACC	AAGCATGTGTCTGGAGAAGT	FBgn0263111	cac
CFDlib01787	TCACGCCTGCCGCTACAGCA	TCATTTGCAAGAGTCCAATG	FBgn0039864
CFDlib01788	CTTAAGGCCCAACCACATTT	GTTGACCAGACTACGCTACT	FBgn0028518
CFDlib01789	GTACGAGTTGCCTGACGGCC	GGTGCATTAGTTATCGACAA	FBgn0000047	Act88F
CFDlib01790	CCGGGACCACCGTTGCCGTT	AACAGCCAAGGCAATACAGT	FBgn0001991	Ca-alpha1D
CFDlib01791	GGGCGGACCGCGCGGCGATC	GTTCAAACGCATGCTCAACA	FBgn0000479	dnc
CFDlib01793	TAGGGATCAAATCACAACTA	GACCTTCGCCGGCATCCCGG	FBgn0264694	mgr
CFDlib01794	CAAGGAGGGAGAGCTGCGCG	TGCAGAGCTCATTAGTGAGA	FBgn0026620	tacc
CFDlib01795	CTCCATGGAAGCCTGCGACT	CTCAATAGTGCCTATGTCCA	FBgn0020930	Dgkepsilon
CFDlib01797	ACGGCTCTCTGTGCGTCCGG	AGATACTCGAAACCAATGAT	FBgn0053519	Unc-89
CFDlib01798	CATCGTCCAGAGCACAATCA	CAAGGCGCTGCGCGGATTTC	FBgn0030641
CFDlib01799	GCTCGGCTCGCTGGCCTTGA	AATGGTGCCGATATTAACCG	FBgn0010770	ppan
CFDlib01800	TGTGAGGCAAACGGCCAGTG	AGATACATGGACTCACATAG	FBgn0051522
CFDlib01801	AGCACTGTGATCATGTACCA	GGCAGTGGCGGATAAGACCT	FBgn0050008
CFDlib01802	CTGATCCGGAACTTAAGCAG	CGCAATACCTGCACAATCTT	FBgn0013811	Dhc62B
CFDlib01803	TGCTGGCGAAGCGCTGGTCT	TAAGAGCCCACATCTGTTCA	FBgn0029608
CFDlib01805	ACGTGGAAGGTGAGGTACTT	TTGTCGTTGAGTATGACGGT	FBgn0004396	CrebA
CFDlib01806	TTCTTCATCCAGTCGAAGTA	GCGAGGAGTCCACATCGCCC	FBgn0000251	cad
CFDlib01807	ATGCATTTGAAAGGACCGCG	GACACAGTTGTGGCTAACAA	FBgn0038014
CFDlib01810	GCAACAGGTTATCCGGCAGA	ATGAACTGCTTTATCGAGAG	FBgn0017558	Pdk
CFDlib01811	CTGGCAATTTGCGTTCCAGG	GCGTGTGCTCCCTGATCTCG	FBgn0030787
CFDlib01812	CGAAATCCGGTTCGGGCAAA	GCCCACTTCGGATACGGAAG	FBgn0030300	Sk1
CFDlib01813	GAACTACAAGTACCACTAAG	AGCTCCGGCCACAGCGTTGG	FBgn0035032	ATPsynF
CFDlib01814	CGGAGATGGCTTCTTGCGAT	TTATGAAGATTGCCGCCAAC	FBgn0015903	apt
CFDlib01815	AGGATATATTGCCCACCAAG	CTGCAATCGCTTCCATACGC	FBgn0034180	Ehbp1
CFDlib01816	CGCGGAGGCGCTCACGGACG	AAGCATATTTCGTGAGGTGG	FBgn0016977	spen
CFDlib01817	CTCCGTGGTTCTCCTTCACG	CGCGGTATCCAGCAGCGGCC	FBgn0000588	esc
CFDlib01818	GACATCCGCATTTGCCAGAA	TGCTGGCGATGCTGCGGCTT	FBgn0028481
CFDlib01819	TTGCTACGTTGCTGCTATTC	TGAGAAGTCCGCGCATTCTT	FBgn0010575
CFDlib01822	CATAGATGACAACTGGACAA	CCACATTGATGGACATCTGG	FBgn0004620	GluRIIA
CFDlib01823	TATGTTCGACTCCAACTACC	GTCTCGTAAGGAGAGATACG	FBgn0036184	PCID2
CFDlib01824	CACTCCTTCGTCATCCATCG	CGTCCTGTTCTCCTACAATC	FBgn0010770	ppan
CFDlib01826	GTGCAAGGTGTGTGGAGAGC	GTTGTACGATCGGCCGAAGA	FBgn0001323	knrl
CFDlib01829	ATCTTTGGCAACATGACAGC	TCCAGCAGCTGAAGAAGCTC	FBgn0027558	pgant3
CFDlib01830	TCAACAGTCGTATGGATGCC	GCGATTTACTCTGATGCTGA	FBgn0029828
CFDlib01832	CATTCTTCGCCGTCTACGAC	AACAACTACGGCAGTCGAGC	FBgn0035425
CFDlib01834	GACAGGCTTTGGACCACCTT	CATAGGATAGCTCCCATTGA	FBgn0036942
CFDlib01835	TCGCTCCACTGCTCGGTATC	GCTCCAGCTCCTTGTAGATC	FBgn0013733	shot
CFDlib01836	AAGCTAAATTCTGAAGTTAT	TCACCGTTACATTTCACTGT	FBgn0033010	Atf6
CFDlib01837	TGTTCGACCAAATTCTAGCA	GACTCAGGGACTTGGCTGCG	FBgn0033038
CFDlib01838	CTTCCGGCACGCCAATGGTT	AGCTGGAGTCGCTCGTGGGT	FBgn0036801	MYPT-75D
CFDlib01839	GTTTGGTCTGCTTGACCACC	TGCCATGCAGAGTGCCGCTT	FBgn0005626	ple
CFDlib01840	GAGCGTCGCCTGGTCGCCCG	GCCATAGCACGCCAAGGACA	FBgn0004856	Bx42
CFDlib01842	GGTTGGGCAAACGTGGATAA	AGCCAACTGCCTCTGTTCGC	FBgn0014930
CFDlib01843	TGCGAGGGTAACTGCTCCCG	TCGCCATACATGACAGTCCG	FBgn0036369
CFDlib01844	TCCTCCAGGAAACCTCTTAG	CAGCCTGAAAGTCCTTAATT	FBgn0032163	TbCMF46
CFDlib01845	AAGCAAATTTGTTCGTCGTA	TCATAGAGACGTTTGGTGTC	FBgn0004118	nAChRbeta2
CFDlib01846	CACACTGGAGCAGCACCGAG	TGTCTCATATTCCAGCTGAT	FBgn0011592	fra
CFDlib01847	GCGCCTCATGTCCTACTCCC	TCACTGTATTTAACCTCGGA	FBgn0004053	zen
CFDlib01849	ACAAACCCTTCAGCTTCCCG	CGCTCCTCGTCTGAAAGCGA	FBgn0026573	ADD1
CFDlib01850	CTTTGAGAATCTGTTGGGAC	TATGACACGCGCTGGAGCCC	FBgn0031905	gudu
CFDlib01851	ATGAGAGCGCTGTCAGCGGT	GTTTCCAACGACCATCAATT	FBgn0004170	sc
CFDlib01854	CTGGCTGGCGAACATAGAGT	ACAAGCAACGCTCTTTAAGA	FBgn0034265	Snx16
CFDlib01856	CAACAGATTCATGCGCCCGA	TGTCAAGATCATCTCCTACC	FBgn0026375	RhoGAPp190
CFDlib01857	GCCCTACCGCCGCCCACCGC	GGCTCCTGGCAATCGGTGGG	FBgn0031016	kek5
CFDlib01859	TTCGGATGTTGTTGTCAGAA	TGGAAAGACCGAGCACTACA	FBgn0037518
CFDlib01861	GAGAACGGAAATGGTTATCA	ACCGGATTCGAGGTCAAACG	FBgn0031610
CFDlib01867	GCCATCGATATGTGGGTTGC	TGAATTCTGCTGCTGTAGAT	FBgn0021764	sdk
CFDlib01873	ACTTGTAACGAAACTTTCGA	TTCCTCATTTGGATCCTCCA	FBgn0036331
CFDlib01874	GCCCGCCTCAGCTTTCCCAG	CGGCTCCACGGGACCGTCAT	FBgn0037166
CFDlib01876	AGAGTCCGACAGGCAGATGT	TCGAGATCCGTTTATGTTCA	FBgn0037491
CFDlib01878	ACCAGTGAACAGGAGTCGAC	ATTGCAGATGTCCACGCAGT	FBgn0029504	CHES-1-like
CFDlib01880	AGGCGGCGCTCTCCATCACG	CAGTCGCTGAGAAGAAATCT	FBgn0031375	erm
CFDlib01881	CGACCTGTGGCGCTCCAAGA	GGAAGATTCTAACCGACTTT	FBgn0032881
CFDlib01886	CCGTGTTCCACAAGTCCAAT	TTGGCCTTCTTGGCCACGCC	FBgn0039790
CFDlib01890	TTCTCGCAGTCGTTCAACTT	CGCTTAGATCAATAAGCGCA	FBgn0002905	mus308
CFDlib01893	TCGTCGCTGTCGACAATATC	CTGCCTCTGGTTCTCTCGCA	FBgn0053100	eIF4EHP
CFDlib01894	TCGCTCACATCTCCAAGTCC	GAATAGCTTGCAAGGATCGC	FBgn0030158
CFDlib01896	GTGGTAGTATCGATTCGTGT	CTGATTCAGCGGCACCTTAA	FBgn0062449
CFDlib01901	ACCTTGGCCTTCTCCACGAC	GGTCATCAAGGCCCATCCCG	FBgn0039857	RpL6
CFDlib01902	GCATCACCGATGAACGCAAT	GCCGAACTTGCGCTTGTTGA	FBgn0011656	Mef2
CFDlib01903	TCCATCCCGCCGTCGCAGCC	CGAACATCTCGCGGTTCTTT	FBgn0005626	ple
CFDlib01908	GATGCGTTCTCGCAGCAATT	CGATTCCCGACTATGGCATT	FBgn0030087
CFDlib01915	GCTTCTGAGCTATGCGTCGC	TGGTGATGTCCGAGGCCGGT	FBgn0013811	Dhc62B
CFDlib01925	AACATGATGATCGCCTTCGT	GGGATCGGGAACGGTGGTCA	FBgn0010452	trn
CFDlib01926	CTACGCTGGCGTCATATTGA	CGACGCAGGTTGCGGTCCGG	FBgn0026777	Rad23
CFDlib01928	TAAGTTGAGCTCGTCATCCA	CTGGTGCACGGCCACGGGAT	FBgn0002985	odd
CFDlib01929	AAAGCTGGTCGATAGTCGTA	TTCACGGATGCGGACTTCTT	FBgn0052056	scramb1
CFDlib01930	CAGTTGCCTCGCAACGGTTT	TTGCTTGTGGTCCGTGTTAT	FBgn0039879	Ir100a
CFDlib01931	TATGAACATATTCGATCCGG	TATAAACTATTAGGATCACA	FBgn0250823	gish
CFDlib01932	TGGCTGCGGCGCCCGGTGGC	TGTGCAGAGGAAGAAATTTA	FBgn0259677
CFDlib01933	TCAGAGCATCCAATGTGTCC	TGATTGTGGAAGCCATGAGC	FBgn0033401
CFDlib01934	CAACAATCGCGTAAATTTGA	TACCACTATATCACCACCAC	FBgn0028991	seq
CFDlib01935	AGGCCTGAAACAGGTTGTCC	GTAACCGGTCAACTCCACGG	FBgn0026438	Eaat2
CFDlib01936	AAGTTAATTTGGTACCAGGA	GCAAGAAGGGACCTGCGCCA	FBgn0000546	EcR
CFDlib01937	CAAACACTGGTTCTACTATG	GGCATTCGATTGTTATAGCC	FBgn0025455	CycT
CFDlib01938	TGCCACGCGTGGTCGTCGCG	CTGAAGCTTAACCAGCAGGA	FBgn0034013	unc-5
CFDlib01940	TCATTAGGACGCTGCAGCCG	GATAGAGATAGGAACTCCGG	FBgn0031874
CFDlib01941	AGATCATGAACTGCAGGGCA	TAAACTGTTCGTAGAAGTTG	FBgn0030746
CFDlib01943	CTTGGCCCTGTCGTTGCACG	CGTATTCCGGGACAAGTTTA	FBgn0034717
CFDlib01944	ATCGACATCTGATGCTTCCA	GGATATCAAGAATATCGCGC	FBgn0015609	CadN
CFDlib01945	AAGACCTCCGAGGACTTGCA	GACGCTGTCATCGAACAAGG	FBgn0010433	ato
CFDlib01946	TGAAGTCCCAGCCAATACTG	CATTGCCGAGCTCTGTGGAT	FBgn0027499	wde
CFDlib01947	TCTGGCCAGGATTACTGGAC	CTGCCAGAGTTCTGTGTCGT	FBgn0085477
CFDlib01949	CGCTCCGGATTGATTCACGT	GGAGAATCTATCCAATGACC	FBgn0050021	metro
CFDlib01950	TGAACAGGACACCAGTCTTA	CTGTGCGGCATCGATAATCC	FBgn0039602
CFDlib01951	ACACATGAAGGAAGCTCAGC	GACACGCAACTGGCCACTGG	FBgn0052072	Elo68alpha
CFDlib01952	CAGCAACAACGGCCCATCGG	TTTCTGTGAGGTTTGAAACT	FBgn0000183	BicD
CFDlib01953	TGATAGTCTCGCCGGTCAAG	GAATCGTGAGGACGAGCTGC	FBgn0028341	Ptpmeg2
CFDlib01954	GGCCACTTTGCTGCTCTGCC	GCTGAACTTGCGTTTCCCGC	FBgn0036141	wls
CFDlib01955	TGCACATTAGTTCCGCTGCC	GGCTCAACGTCCAGTCGATA	FBgn0004649	yl
CFDlib01956	ACAAACCGTGGTCACCAGCT	TGGCCACCAAGGGTGACAAT	FBgn0011205	fbl
CFDlib01958	CTTTCCATCGGCACTCTTCA	GCGACGCACAGTCCCAAACT	FBgn0034432
CFDlib01960	GCATCAAGCCACCACCTCAT	TCCAGTCGATCTAGTGTACG	FBgn0003042	Pc
CFDlib01961	CTGGACGCAGTTCTGTCCGA	TTGGCTCACAGTAGTCGTTT	FBgn0032018
CFDlib01962	TGGAACTGGACCATGAGGGC	CGCGTTGTCGGGTCAGATAA	FBgn0011660	Pms2
CFDlib01964	GGCGACCATGACTCGGCTTC	GCTGTTGTGCTGTTGTTTGA	FBgn0000489	Pka-C3
CFDlib01966	GCGATTCCGCAAGCTGGATC	GTGTCGCAGTTTAGCGTGCG	FBgn0010014	CanB
CFDlib01967	GAAGTCGACCTTATCCATGG	AAGTATATAGCCGAGTCCAG	FBgn0036160
CFDlib01968	TGCCACGCCCTTGATGCTAA	GCTTGTTCCAGAACTTTAGC	FBgn0029092	ced-6
CFDlib01969	GTTTCCGTATTCATAGATGC	GCACAATAACAAGTCGATCT	FBgn0035838	ldbr
CFDlib01970	AGGGCCACGAATTCTCCTGC	ACCGAGGATTCGACCTTTAT	FBgn0015300	Ssl
CFDlib01971	AGCTCTGCGCAAGAATCCGT	TAGTGAGCCTCCGGATGACG	FBgn0031723
CFDlib01972	TCTGCTGCACCTTGCTGTAG	GTTCGCACGCGGATTCCCTC	FBgn0034025	GalNAc-T1
CFDlib01973	GCTGGGCGTGTAGATCACAG	AGATTGAGAGAGCGTAGCGA	FBgn0028518
CFDlib01974	GAAAGTTTATCCGGTATTGG	CAGTTGGTATGTGGCGCCTG	FBgn0032370
CFDlib01975	GCCACCGGACATGACGATGT	CAGGGTGAGGATACCACGCT	FBgn0000044	Act57B
CFDlib01976	AATTAGCTCCGCTAGATTGG	CAGCAGCAATAGCCGCGAAA	FBgn0030316
CFDlib01977	TTTGTCATTCTAATTCTCTA	TGGCCGGCAATCTTCCAATG	FBgn0038719
CFDlib01978	AGTTGAACTCTTGAAATCGA	TAAATCCTCTACAGACTGTC	FBgn0034299
CFDlib01980	AGTGGATCTTAAAGATGCCA	GGAGTACTTTACTATCGCGA	FBgn0032524
CFDlib01981	CATCCTCGAATGCCATGCAG	CACAGACATGATCACGCCCA	FBgn0033196
CFDlib01982	AACTACTGTTTGGAATCGCA	GGTTCTATGATGCTGATCAT	FBgn0026199	myo
CFDlib01983	TCTTTAGCGACCACAAATAC	ATCTGTGGCTTCCGCCGATC	FBgn0011826	Pp2B-14D
CFDlib01984	ATTATAAGCTTACCCGGAGG	CTATTCGTGGCAAGCGCAAA	FBgn0028573	prc
CFDlib01985	GGAGACAGTTGGTTTCTGGG	GGCCTCGTCATGCGGATGAC	FBgn0037339	Pi4KIIalpha
CFDlib01987	TGACTCTGCCGTGGCCTGCT	TCCACGATCTCCTTGGCGTA	FBgn0034921	DCP1
CFDlib01988	GAATAGCGGATCCAGCGGTG	AGTGCATATCTCGCTCTGTT	FBgn0004797	mdy
CFDlib01989	CGGTGCGTATACGTGACCCA	GATATCACTGCTCCATTTCC	FBgn0003411	sisA
CFDlib01991	ACGAAGATATGCGCAACTCT	TGAAGATCAGCACGGAGAAC	FBgn0030993	Mec2
CFDlib01992	GCCACCTAATGGAGCCACTA	GGAAGGGAGTCTGGGTTAAC	FBgn0035106	rno
CFDlib01993	GAAACCTTTAACAACACAAA	AAATGCCCGGTGACAGTGTG	FBgn0004177	mts
CFDlib01994	AATCTCATATCCAACGATCT	GTGACAAATTCTTCGCGACC	FBgn0032908
CFDlib01995	CAAGGTGCATCCTTCCCACA	GTGCGGTCATGTATTCCACA	FBgn0034312
CFDlib01997	GGCGCCGACATCGACGATTC	GGTGATAAAGCCCTGTTTAA	FBgn0038571
CFDlib01998	ATCGCTGCTTGCTGCCGGTG	GCTGTCGCTGCCGTCAAAGG	FBgn0004892	sob
CFDlib01999	CTGGAAAGTGGGTTTCGATG	TGACCAAATCGAAGAGATTC	FBgn0037618	ouib
CFDlib02000	AGGACATTGGGCCCATGTCC	GGCCACGGGTGGCGGAAGTG	FBgn0035228
CFDlib02001	TGGGATCCCTCGGAGTATGG	TCGCCTGAACGGTTTCGCAG	FBgn0000039	nAChRalpha2
CFDlib02002	TCGGTGAGTTCCTCCATATC	GATGTGTTTCTTCCAGCTTC	FBgn0004242	Syt1
CFDlib02005	CACTTATCACATCGTGTCCA	CAACGCCTATCTCACTGCGT	FBgn0003896	tup
CFDlib02007	TGATGAATCAGAAAGGTTTC	GGAGGCACGTTTGGGCTACG	FBgn0033693
CFDlib02008	GCAGTTCTCGATCTCCTTTC	CGCCTCCGGATCGTAGGCCT	FBgn0022382	Pka-R2
CFDlib02009	TGGACAATTCGTGCTCCACC	CTTCCTGCTCAGCCTCCGCG	FBgn0027287	Gmap
CFDlib02011	GTGTTCATGTTAAGGTAATC	CTGTCCGTCGGTGATGTCCG	FBgn0027621	Pfrx		First sgRNA is not unique and also present in HD_CFD2366.
CFDlib02013	GCGGCGTTTGGTAGGCGGCC	TCCTCCGTCCGATCCAGCCA	FBgn0004880	scrt
CFDlib02015	GACGGAGACTTGATTGGCGT	TATGCATACGACCTATTCGA	FBgn0024371	E2f2
CFDlib02017	GTGCCCGGTCAAAGGTATAA	AGCTTACCTTCGAAGGCAAG	FBgn0033710
CFDlib02018	TTGCATATGGTGTTGGACAG	CTGCGTTTCATCAGTGTGCG	FBgn0037085	Neu2
CFDlib02019	ACATGGTATAGAATGCGACC	CGTGGTGTCCTTGGTGCACC	FBgn0003720	tll
CFDlib02020	AGCCGCAAAGGAGGTTCCCT	CAGATCAGTGACCTCGTGAA	FBgn0036448	mop
CFDlib02021	TTGCCAACATTCGCCGCCTG	GCAACTGGTCCAGAGCGGTC	FBgn0035390	scramb2
CFDlib02022	GTGTTGCCCGGGTACTCCTT	TCCTCGAGACGAGCGCTCCA	FBgn0003189	r
CFDlib02023	AGCGTGGATTTATCAGCGCC	TCATTTACATAGGGATCCCT	FBgn0036875
CFDlib02024	TGGAATCCGGATGACTATGG	CGTAGAGTCGCTTCGCATCT	FBgn0000036	nAChRalpha1
CFDlib02026	GACCTTCGCTCCCGACAATG	GCACTATGTAGTCGCCACGC	FBgn0000721	for
CFDlib02027	TTCGCAGGGTATCCCTTTCA	GTCTAATAGAACCCGTCTCC	FBgn0001147	gsb-n
CFDlib02028	GCCCACCGAATTAACCTCGG	AACGAGAAGTGAAATCTCCC	FBgn0033998	row
CFDlib02030	GGCCAACCACACCAGTCGGG	GGCATGGGAATGAATCCCAA	FBgn0029831
CFDlib02031	GATCCCTGACCAGGCAGTAC	TGATTGTAATTAGCCTCGGA	FBgn0017590	klg
CFDlib02032	GGCGGCCCACAATAGTGCAG	ATCGTTCTACCAGTATGAGA	FBgn0003975	vg
CFDlib02033	AGGTATTTATCATGTGTCCC	ACTGTCGAGACTAAATCTAG	FBgn0034023	Ir52a
CFDlib02034	GCTGCGCGAGGATGTGTGAA	GGCAGGCCCTCCTCGAAATA	FBgn0030841
CFDlib02035	AGAATTCAAAGACTGACAAG	CAATGGTACCGAGCCACAAA	FBgn0000287	salr
CFDlib02036	TACTAGCGTCAATGTGAATA	CGCCACAGGTTACAGTCAAC	FBgn0011606	Klp3A
CFDlib02038	GACTACTTTGCCTATGCTCC	TACGAGCAAATCTATATGAT	FBgn0038398	sxe2
CFDlib02039	GATCGAGGATAGATAGTAGT	AAGCAATCCATGGATAACCA	FBgn0037762	eloF
CFDlib02040	AAACTCACCGCTGTCGGATG	GCATTGGCCGCACTACAAGA	FBgn0025633
CFDlib02041	ACGCGGGTGCCGAGAACTTC	AGAATGGAGGCATGCCCATT	FBgn0002524	lace
CFDlib02043	GATTGGACGCACTCACACCC	GGCGCCGTAATAGCGATCCA	FBgn0036162
CFDlib02044	GATCTGGACTCAGGCCACCG	GCAGTGCGCGGTGCACGACC	FBgn0003134	Pp1alpha-96A
CFDlib02046	GTGGTCAGTACATCAGAGCG	ATCTACACGGCCAATCGCCG	FBgn0029131	Debcl
CFDlib02047	GAACCTCACGCCCAACGACA	GCTGTAATCCTCGGAAGCAG	FBgn0039283	danr
CFDlib02048	ACGATCGATCTACAGATCGG	GAGGCAGCTCAGTTGAGGTG	FBgn0026438	Eaat2
CFDlib02049	CGACGACGAGGAGTCATCTT	CAGTTCTGGTACTGAAGATG	FBgn0000022	ac
CFDlib02050	GCGCGGGAATCGCCACAGTC	AAATCGAACTCATAGACGCG	FBgn0038957
CFDlib02052	TGCCGCTGCCTCAGCCCGCC	CTGCGCACCATTAAACGCAA	FBgn0042111
CFDlib02054	ATCGGCTGCCATTATGAATG	CTGCTGCTGGTCGAGGTCGA	FBgn0041092	tai
CFDlib02055	TCTACTCAATCGCGACAATG	GCTGCACAACGTTTCACTCA	FBgn0016762	angel
CFDlib02056	TGTTGCACTTAACCGCGAGA	GGCCAGAGGCGAGGGCACAA	FBgn0010194	Wnt5
CFDlib02057	TCAGCGACCCACTGATATTC	TATTTCGTGAGTAGTTAAGA	FBgn0003140	PpY-55A
CFDlib02061	CACTCCGAGCATTATGTTCA	ACTTACAAGTTTATGTGTTT	FBgn0046692	Stlk
CFDlib02063	ATGCGGCACGAAGCTCACGT	TCCCTGGATTTGCCTAAGCG	FBgn0030841
CFDlib02064	TCAGCGCGCCCGAATTGTCC	AAATGAAACATCACTGCCCA	FBgn0015614	CanB2
CFDlib02065	CTGGGCGTGATGACGCCTTC	ATGTCTACCCTGGCCAATGG	FBgn0024997
CFDlib02067	CAAATGGGCCTTCAGATGCG	ATTTAGCAGCGCATCGCCGC	FBgn0025679	Klf15
CFDlib02068	GTCATCTGGCAAACCGGTTC	TCTGGCTAGGCGCAATCTCT	FBgn0029890
CFDlib02069	TGGAACGTGATCGGCAAGCA	GCTGCCTGCGCTGGAATTGT	FBgn0024993
CFDlib02070	GTGGAGCATAGCTCCTCGCC	AGATCTCGTTGTAATTCTAG	FBgn0030940
CFDlib02071	CAACGGAGCTTCATAGATAT	CGGTGAGATGTGGCGAGCCA	FBgn0038979	tHMG2
CFDlib02072	GAGAAGGGCTCCAAGAAGCA	AAGTACGAGAAGAAGAAGTT	FBgn0052829
CFDlib02073	CGAAGATCGCGTACGCATCC	TAGAGATGACCTGCGAAACG	FBgn0051365
CFDlib02074	TCCGCTCGGCTTCGTGCTAA	CAAAGTTGGACTGCTAGACA	FBgn0051729
CFDlib02075	TCGTACAATCGTTTCGCATC	AAGCACAAGAATCATATCTA	FBgn0015519	nAChRalpha3
CFDlib02077	TTAGATACCTACGCTAGATT	ACTTTCGCACCTGGCACTGT	FBgn0261402	Ir75b
CFDlib02078	CGCATGTAAAGGCTCCGAAA	GAATCAGGATAATCCATATG	FBgn0001323	knrl
CFDlib02079	AACTGGCCACCACAAGCTAT	CTATGAGTTTACGGGCAGAG	FBgn0005427	ewg
CFDlib02080	AACTCCGGACTCATGTAGTG	CCTGCAGGATTACGAGGTTT	FBgn0029970	Nek2
CFDlib02081	CACCGCTGGTCCCACGGTCA	CCACATTCGTTCTCTCTCCT	FBgn0038840
CFDlib02082	TGATTTCTGCGAACACGATT	CGAAGGCTGCTGGAGCATGT	FBgn0019949	Cdk9
CFDlib02084	TTAACGTTGTAGTATGGCGG	GCGGACGTAGCCAGGCAGCG	FBgn0024806	DIP2
CFDlib02085	GGACCCATGGACATGTACAA	GATGAACGTCTATAACCGAA	FBgn0030796
CFDlib02086	GGCTAAAGGCTCGCGAAGAG	AGTTGGACCAGGTAGCTCTC	FBgn0043796
CFDlib02089	AATGAACTCGTACTTTGAAC	AGTCCCGTTAGCCATCGCGG	FBgn0003944	Ubx
CFDlib02091	ATGTTGGGCAAAGACGGCTT	GGCAATACATCCAGCCAACA	FBgn0039937	fd102C
CFDlib02093	ACGACCACCAATCGCGATTA	TGGCCTTCTTCATATTGGAT	FBgn0025821	I-t
CFDlib02094	CGACTACGACAAACAATTCC	ACAGAGGCCACTAAACAGCG	FBgn0015278	Pi3K68D
CFDlib02095	GACTGCCGAGCACCAAATTG	GCTGTCGATGCTTCCGTCCA	FBgn0040350
CFDlib02096	GGAGACGATTCCCACTCCAG	TTGCTTTGTTCAATGAGCTC	FBgn0003067	Pepck
CFDlib02097	CACTCGTACAGCTTGCAGCT	GGGCATGCTGCACGCGTACT	FBgn0030787
CFDlib02098	ATGAAGAAGTTACTAAGCAA	GTTTAGCATGCAGCAGATAC	FBgn0025573	PpN58A
CFDlib02099	TTACAATTGTATTTCCGAAG	GCTTGAATATTTCCCGGGTT	FBgn0051510
CFDlib02100	TGGTAAAGGGCGTGAGGCGG	TCAACTGAAAGTCATTCATC	FBgn0261524	lic
CFDlib02101	GCGCAGGCCGAAGCGCGACA	GACGGTTCTGGGTAAGGCCG	FBgn0030266
CFDlib02103	TCTGGTGCTGATCTCGTGCC	ATATATCCGAGCGGAGTTTC	FBgn0028888
CFDlib02104	TACTGCTCGGCTCCATGTTG	ATTGTGATCTCGGGACTTTC	FBgn0042627	FASN2
CFDlib02105	AGTGGCATGTCTCTTGTTTC	CACCGGCGGATTCTTCACAA	FBgn0051352	Unc-115a
CFDlib02106	AAATGCAATTGAACGATCAT	AGCCTACACCCATCGTGATT	FBgn0029828
CFDlib02108	CGATGAGGAAATGGGCTTTG	GCTGCCCAGATTTGTGGCTG	FBgn0263600	DNApol-delta
CFDlib02110	CCTGCTCTATCCTCCTTACC	GCACTCGCAGCAGTGGATTT	FBgn0004597	CycC
CFDlib02111	CGCGAATACGACGACCACTT	TTGCTACGTGCAGCCAGTAG	FBgn0261239	Hr39
CFDlib02112	TAGAGTCCGAACCATTTAGG	CGAATTCATCCTATTTCTCG	FBgn0047338
CFDlib02113	GGAAACAGCGACGCCTGGTC	ATTTCTGTTTGCCCTCGACT	FBgn0004009
CFDlib02114	AGAAGGGCTCTCAACAAATT	TGATCTACCGCAAGGCGTTA	FBgn0032026
CFDlib02115	GGCAGATGTTGCTCACCGGC	GGCTGTGGTGGCTTCATCCA	FBgn0038638
CFDlib02116	AACGCTCGTACAAATCACGC	TATAGGCTTTAAATCCTTGG	FBgn0038365
CFDlib02117	CAACATAACGCCCAAGCGGG	GAATGGTGCCATCCGCCGTC	FBgn0032979	Clamp
CFDlib02118	CGGCGGCACCCAGTGGCTCT	TCTCGTAGGCGGAGGGCACC	FBgn0027788	Hey
CFDlib02119	CATTTCGTGTGGCTTGTTGT	TGGACGGTGAACATAACGAC	FBgn0004368	Ptp4E
CFDlib02122	AGGGCACCGGCAAGTCATCC	GTTATCTGTGTGGGTCAGCC	FBgn0038197	foxo
CFDlib02123	CGCACCGCAATGCCGTGTTG	TCGTATACTGGCTGTCCTCG	FBgn0034570
CFDlib02125	TGCACCACGCGCTGGACGAA	GCAGCGGAAGATTGCCGCCG	FBgn0026239	gukh
CFDlib02126	ATCTTTGACCAGGATGACTC	AGGCTGTCAAGGCCAAGGCC	FBgn0030316
CFDlib02127	AATCGAGGACTGCGCCTTAG	GCCGCCGGTGCCGCTGATTA	FBgn0020647	KrT95D
CFDlib02128	GCCGTCTATGGCGCACTCGC	GATTTCTCCATAATCAGTGA	FBgn0019890	Smg5
CFDlib02129	CGATTGTAGTTGGACCGACG	CAAGAGCGCCGAGGACTGCC	FBgn0043903	dome
CFDlib02130	TTGCGAATGATTAGAATCGA	ACTAATTATGACTTAGTACA	FBgn0024913	Actbeta
CFDlib02132	TCCCGCCTGCCAAGTTGTTA	TCTGCGCGCTGCTGGTCATG	FBgn0085476
CFDlib02133	GCTGCTCTGGTCGTTGACAA	GCGTGGACGACCGACGATGG	FBgn0000044	Act57B
CFDlib02136	TTCCTTATTTGCCGAGCTTA	TAGATCTACGCCGTTATGTC	FBgn0051274
CFDlib02137	TGGCGAGGGCACATATGGCG	ATTCAAAGATCAAGTATATG	FBgn0004106	Cdk1
CFDlib02139	TCCAGCAACGCGATTCGACA	GAGCGCGTTTAGCTTCTCGC	FBgn0259166
CFDlib02140	TCACATAACGCGCAACTATA	TGAACAATGGTCCAATGACC	FBgn0053110
CFDlib02141	GATTCACCTGCATGGCGCAC	GGAAGAGGGCCAACTTCGAC	FBgn0032775
CFDlib02143	CAAGTGCATGTACATCGACA	AACGAATGTTCAGGCACAGC	FBgn0003479	spn-A
CFDlib02144	ACTGCCGGTTATGCAACGTG	AGTAGTGACCACCGGAGATT	FBgn0024993
CFDlib02145	CTGGTGAACGGAACGCAGAC	CGGCGACGTTAGGCTCCAGT	FBgn0036934	sNPF-R
CFDlib02146	TGGACTGCAGCTCTCTATCC	ATTTAGAATCTGCTGGACCT	FBgn0259215	Ir93a
CFDlib02147	GCCGGCTCGTCATACCAAAC	GGAGCAGTCGAAATCGTCGT	FBgn0010109	dpn
CFDlib02148	GGGAAGAGTTCGTATTTAAC	ATTTGCAGCAGCGAAATCAT	FBgn0029067	Dd
CFDlib02150	CCGAATCCAAGCTGATCGCA	GCCGCGATCCATCCGGTGCA	FBgn0000071	Ama
CFDlib02152	GGGCAATGGCACCTACGGTC	GGTGACGTCCATCACCTTTA	FBgn0010909	msn
CFDlib02158	AAGGCGGTGATGCGCCGCAT	AGCGAAAGATGGATACAATG	FBgn0027363	Stam
CFDlib02159	GAAATTGACGCGGCAATTAT	CCAATATAAACTATACAACA	FBgn0040001	FASN3
CFDlib02160	GTCTAGTTTATCGCAAATGT	CTTCACAGTGACGGACACCC	FBgn0038588
CFDlib02161	ACCACAGATACTTCTGCATC	AGGAACCAGTCATTGGTGCG	FBgn0038986	sit
CFDlib02163	GTCCGAACTGGAAGTACAGA	GGATGGTGTTTCGGCGGTAA	FBgn0005777	PpD3
CFDlib02165	TGACGCGCTCCTCAATGGGC	GGATACGCCGGAAAGACCGT	FBgn0039474
CFDlib02167	GTCAAGTCGCCGTTTCTAAT	TGTCCACGAACAGCTTCATG	FBgn0263398
CFDlib02168	GCTGCAGGATCATTGCAGTG	AAACCTTACCAAACTAAATC	FBgn0039332	alrm
CFDlib02169	TCATGTTGCCCTTCTGGAAG	GTGATCGCGGGAGCGTTAGT	FBgn0000299	Col4a1
CFDlib02172	ATGCTCCCGAAGGACTGGCG	TTGGCCGGAACAGCACTGTG	FBgn0034712
CFDlib02174	GGCAGCCAAAGGAGTTCGAC	TAAACCCAACACAAGCTATA	FBgn0005427	ewg
CFDlib02175	CAGTATCATCTCGCGCCTGC	CCACGATGGCGGCCACCGGC	FBgn0003134	Pp1alpha-96A
CFDlib02176	GCTGCGTTAGATCCCGCACC	GAATCGGAAGTCAACGAGTG	FBgn0085433
CFDlib02177	CCAGTTCGCCGACCGGACGT	TAGCACGCCGGTCAAATTTG	FBgn0004652	fru
CFDlib02180	GTAGCACAAATGCTGTAGAT	TGTTATTGCACCTACTCCTG	FBgn0260799	p120ctn
CFDlib02182	CGAGAGCGAGATGATTAAGA	AAATGGTGGACTACAGCAAG	FBgn0011573	Cdc37
CFDlib02183	TGCGCCTCAGGCTTAGGAAT	AACAACACTGATCCCGACCA	FBgn0085408	Shroom
CFDlib02184	AGTCAAGCAAGAGATTGAAT	CGGGAAGTCTGATCGTGTCA	FBgn0020381	Dredd
CFDlib02186	TGGGTGTAAAGGCTGTTCGG	CGAAACAGAGGGCACTTCCC	FBgn0038912
CFDlib02189	CTCCCGCACTTGCTCGGGTC	ACATCGATGCGCGAACGCTT	FBgn0020496	CtBP
CFDlib02191	GTAAACTTATAGGGCAGATG	GCTCCTTATAGCCTGTATCT	FBgn0051793
CFDlib02193	GGACAGCACACTCGATGACA	CACCCAGCTTCAACTTTGTT	FBgn0004170	sc
CFDlib02198	GAGTTCTGCAATAATTCCCA	ACTAGGTCGGATACGTTATC	FBgn0042103
CFDlib02201	GGAACCACCCAAGCCAGCGC	CATTCACACCTCGCCCGAGA	FBgn0000032	Acph-1
CFDlib02202	ACCAGATTCGCAGCATCGAC	TCGGTCCAGGTCGCTGTAGT	FBgn0023177	Pp4-19C
CFDlib02203	GTCAGTCGTTGCAGAATCGT	CAATCCGAGCAAACTGCGCG	FBgn0029992	Upf2
CFDlib02205	CATACCGCGGAACCTCAGTC	GAGGTACGATACAGCCGCGT	FBgn0262647	Nup160
CFDlib02206	CGTGAACGTGACGACGTTGC	TAACCTATTTGCCGGTAGTG	FBgn0026760	Tehao
CFDlib02212	AATGCTGACTACCGTCTGCC	CGGACTGAGTCCGCAGCTGA	FBgn0005779	PpD6
CFDlib02213	GGAACGATATGAATCTTCGA	ATCTCGTTCTATCCTGACCA	FBgn0086778	nAChRalpha7
CFDlib02215	TCCTGCTGCTGGGAACCACC	GTGGCGTCCAGTGGATTGGC	FBgn0015773	NetA
CFDlib02216	GCTTCTTGCGGCTCATCAGT	CTACGCCGCCGGACCCGGCG	FBgn0027788	Hey
CFDlib02218	GATGTTTACGGTCACCAATA	GACTCGGCTACGATACAGCT	FBgn0027866
CFDlib02219	AGCAGTTCGCCCGCCGATTG	TTCACCCGACGTCCCTGTGT	FBgn0030300	Sk1
CFDlib02220	GGCCACATTGCCAGTGGCCC	GGTTAGTTCTCCCGGCACTG	FBgn0023095	caps
CFDlib02221	CACTAGCTACAATGGAAATT	CAGCTATGTTCAGCTTGTGC	FBgn0016754	sba
CFDlib02222	CATGACGCTGTGGTGCGTAA	AGTCGGCTACGACAGTGATA	FBgn0025802	Sbf
CFDlib02223	CTTAGTAACAGTACGCGCAC	CCATGACAGAAGGACATGAA	FBgn0020767	Spred
CFDlib02225	AGAAAGAAGTCGTTAACGCG	CTTCTGGTACTTTGGACCCA	FBgn0051523
CFDlib02226	GGAGTACGTCAAACTGGACT	CGTACTCCTCTGCCTGGCTA	FBgn0050020
CFDlib02229	AGGACCTGATGGGCAGGACC	GCTGCTTCTGTTTGTTGTGA	FBgn0011592	fra
CFDlib02235	GGGCGTAAATAATCCCAGTA	TCGCTTCGCGTGGCGGATGT	FBgn0028978	trbl
CFDlib02236	CCCGACGAGACAACTGTGAT	GCTGGCCCAGACCGTCGTCT	FBgn0069242	eca
CFDlib02237	CGCACCATCTACAACTTGTG	CTTTGAAGGAACGCTCTGAG	FBgn0261387
CFDlib02239	TATGGATGTCGAAACAAGTC	TCGTTCACAGGATCGCATTA	FBgn0029949
CFDlib02241	CAATCTCAGATCCACATTCA	CGATAGTAATTTGCCGGAAT	FBgn0051776
CFDlib02242	CAATGTTTCGATCCGGAAGC	AGATGATGTATTCATGACCC	FBgn0020767	Spred
CFDlib02243	TTATTATCATCCGTGGACCC	CCAAGTCGTCCATGCTGCAT	FBgn0243486	rdo
CFDlib02244	AGATCGGCTTCGAGACGTTC	TGCTGTGCCTTCAGACGCAG	FBgn0053514
CFDlib02245	GGTCCAACGCCACCAGTGCC	GGAAGTGGTTGTCCGCCACG	FBgn0260463	Unc-115b
CFDlib02246	TGTGGTCCGACCCTGATCTG	AATCGGAGAGATAGGATCCG	FBgn0025573	PpN58A
CFDlib02249	GGCGGCGGCGTTGTTACCAT	GTCGAACTCGTCGAGTTCCT	FBgn0005771	noc
CFDlib02251	GCTTGTACGTCGTTCGCAGA	GGATGCGCTCACGTTCAACG	FBgn0030692	mRpS30
CFDlib02252	TGCAATAGTGTCGCTCATCC	TGTGACCTTCTCATTTAGAG	FBgn0051780
CFDlib02253	AAGCTGAGGCAAATGCCGCG	ACTGCACGCATCCCGACCGA	FBgn0262473	Tl
CFDlib02256	CCCGGCTTGGAAGGACCTGC	AGAGATCTAAGGCATCTCTC	FBgn0016075	vkg
CFDlib02258	GTTGCGATCGTTCTGCAAAC	CCTGGGCGGAAACGTACTCA	FBgn0030274	Lint-1
CFDlib02259	TGGTACATGGTGGTAGTGAT	CTGTGACGGTTGCCTGGAGA	FBgn0027095	Manf
CFDlib02264	GGAGGCGCTCGTCACGGCTT	TTCTCATCGTAGCAATTTCG	FBgn0030163
CFDlib02265	GAGGGCGTCGACATAAAGAC	CGAGGTGTGGGATTTCATGC	FBgn0015903	apt
CFDlib02269	CGTGTTGAACAGCAAGTGCG	CAGGCGCAGCGTGAGCAGCC	FBgn0016762	angel
CFDlib02274	AGATACAGCGGCCAGGAGAT	TCTGAGCCGATACGAGTCCG	FBgn0243514	eater
CFDlib02275	CACCGACAAACAGCTTCGAA	GGCTGTCCTTGAGCGGCGGA	FBgn0016977	spen
CFDlib02276	TTTAGCAAAGACGATTGCAA	CGTTTCTATGCCGAGGAGAC	FBgn0031451
CFDlib02281	ACGAGCGCGAGGACATCTTC	CTGCCAGGGCATGGCCTGTG	FBgn0020620	RN-tre
CFDlib02283	AACTACACTGGCTTCGCATA	GTGAATTAGCAAACACTCCC	FBgn0039280	Mocs2
CFDlib02285	GTTGCTCCTCCACTTCTTCG	AATTCAGCGGTGCAGATCGG	FBgn0026060	Mipp2
CFDlib02290	TATCACGCTGACTTTGATAA	GATAGACCAGTTTACAACTG	FBgn0051097
CFDlib02303	CACTGCATATACCCGCCATC	GGTCCTTGCACGCCCAATCC	FBgn0000015	Abd-B
CFDlib02305	AGCTGGGACCCACGAAATTT	CGCCCAGGACGATTCGGTGG	FBgn0039124	tbrd-1
CFDlib02306	GTGGGCGAGAAGCTCTCTGA	TGATCGACCGCGCAGCTTCT	FBgn0025360	Optix
CFDlib02307	ATGCAGGGATGCACCATCCG	TTGGCAGCGGTGGAGGGTAG	FBgn0029891	Pink1
CFDlib02313	CTCGTATTGCGAGGCGTAGA	GTGCTCGAGAGCAGCCTGCT	FBgn0027564
CFDlib02316	TACACTGTGATCACTTGAAT	ATGGTAGAGCATTAGCATGA	FBgn0028675	Sur
CFDlib02317	GTTCTCTATCGCGGTGCCCT	AGTTATACTTGCGGACTATC	FBgn0020545	kraken
CFDlib02322	AGATTGTTCTGGAGCGAAAG	CGAGGGCCACTGGCACCTTG	FBgn0050203
CFDlib02323	TGGGCTCATTCATCTGGCGA	TCTGCAGTGCAGGAATCTCC	FBgn0051759
CFDlib02326	CAGCCGTGCAGGGCGATGAT	AACAGCGGCGCAATCTCCCG	FBgn0020545	kraken
CFDlib02335	AAATCGGGTGAACGAGAACC	CCAGAAGGAGGATTTGATAA	FBgn0038717
CFDlib02338	TTCGCAGGAATGGACATTAT	ACCGTGAAGGGTTACATCGA	FBgn0025115	Acyp
CFDlib02344	TGAAGTTAGGGAGAATCAAC	AACGTTGCCTGAGCTGATTC	FBgn0015609	CadN
CFDlib02347	GACACCGGTGGTGTTCTGTA	TGTCCTCACTGTCAACGCCA	FBgn0262018	CadN2
CFDlib02352	TTGCCTGAACAATCCCAGCG	TCCTCGATCTCATTTGGCAC	FBgn0038767	trem
CFDlib02354	TTAATTTCTTTCCGATCCAC	TTCTGCTTCTCTTTGCAGAA	FBgn0261705
CFDlib02355	GCGCGACCCTTAAATGTGAC	GCTGTGCTGCTCAAGGTAGT	FBgn0042104
CFDlib02357	ATCGTACATGGCCGCTGCTG	TTCGTCGGAATCGTTCAACG	FBgn0001235	hth
CFDlib02360	AGTCGGACCGGAAGCTGTCG	TGGCGCCACGTTCGCGCGCA	FBgn0050169	Brca2
CFDlib02363	GCGCCCGGCGCCTCCGCTTC	CATCAACGAGATCTACGAAG	FBgn0052666	Drak
CFDlib02366	GTGTTCATGTTAAGGTAATC	GCGCACGCGTAGCGACGGCG	FBgn0027621	Pfrx		First sgRNA is also present in HD_CFD2011.
CFDlib02369	CGGAAACGCAGATTGCGTCC	AAGACCCGTGTGTACGTTGT	FBgn0015808	ScpX
CFDlib02372	TCGGTCATGTCGGACTGCAG	GCAGCTCCGAGGAAGTCTCC	FBgn0000259	CkIIbeta
CFDlib02379	CGGCGGGCCAGCCATGGAAC	TGGTGTGCCAAGTGATGATG	FBgn0000251	cad
CFDlib02391	GGCCAAGGAGATTCTCTCCA	GGAATCTCGCCTCGTGGCGC	FBgn0004177	mts
CFDlib02405	GCTGCCATCCACGGATCCGT	AAGGCTGTGAACACCCTGAA	FBgn0086675	fne
CFDlib02406	GTCGGTGGTTCCCGCAAACA	TGTTTCCGAACTTGTTCTTA	FBgn0038902
CFDlib02409	CGGAGACCCCAAGTGGCAGA	CGCTCCTCGGTAGTAGGCTG	FBgn0005586	Rab3
CFDlib02412	GTTGTTCTCCTCGTAGCGAT	ATGTCCGATCCTCTGTAGAA	FBgn0032782	Rab9
CFDlib02414	TGATTTCTGCACGAAAGAGG	TATGAGGAACTCGTCGCGCC	FBgn0015795	Rab7
CFDlib02415	TGATTTCTGCACGAAAGAGG	TATGAGGAACTCGTCGCGCC	FBgn0015795	Rab7
CFDlib02418	CGCTGTGGGCAAGTCCTCAC	GCGTGCGAAGACCTGGGTCA	FBgn0014010	Rab5
CFDlib02419	CTGTTCAAGTTCCTGATAAT	CGGAGCAGCCGGAGCTCTCC	FBgn0016701	Rab4
CFDlib02420	GCGAAAGCGTTCTGCGGTCA	ACTGTCTGATCAATACATCC	FBgn0027504
CFDlib02434	TGAGAGCATACCGTTCCTGC	TGGAGCGCCGGTCCGGCTGT	FBgn0015286	Rala
CFDlib02443	TGCAGATGGGCTTCGACAAG	TGGAACTGGAAGCCTCGAGG	FBgn0020622	Pi3K21B
CFDlib02445	ATCCAGTCCAGCCACGCCCG	TCTGCGACAGCGGCTCGGCG	FBgn0264562	Hr4
CFDlib02446	CGACGTGATCGGCGACCTGA	GAACTTGTCCGATAAATAGC	FBgn0063649
CFDlib02449	ATTGTGGAGTTCATGTATCG	GGCGGAGACGAATGTCGGCT	FBgn0004870	bab1
CFDlib02450	AAGAATCCCAACCTATTGCC	CTCCTCCATGCGTCGACTGA	FBgn0010197	Gyc32E
CFDlib02452	GCCCAGGCCAGTTTGCAATC	CTTATTGCTATGAAGTTCTT	FBgn0259482	Mob3
CFDlib02453	ATCGGAGCTCGTCGGACTCA	GCCGCTGCCTCATTGCTCGA	FBgn0027569	cert
CFDlib02454	CGTCCTTGCCACACCACTTC	CGTCCTCAGTCGAAATGTTC	FBgn0261046	Dscam3
CFDlib02457	GGAGCGCCGTATGTCCTTAT	GAACGTGATATTTGCCCGCA	FBgn0028538	Sec71
CFDlib02458	TCAGAAGCGTTTCGAGGAGC	CCTTCTGCACGTCGCGACGC	FBgn0030065
CFDlib02463	CCAGACTCCTTGGCTCCCAG	ATCTCGGCGATATGGGCGTT	FBgn0016698	Ptpa
CFDlib02465	CAACACCCTGGCCGGTGCTA	CAGTCCTACGCGGAACACGG	FBgn0019957	ND-42
CFDlib02470	CCAAGAACGAGGGCTGGAAC	GGGCCAGAAGGACTCGTACG	FBgn0000042	Act5C
CFDlib02473	GAGCGACTGGTCATCAGTCT	CACACCACACGATCGCTATG	FBgn0051145	CG31145
CFDlib02474	ACTGGTGGGCGACAGCGATG	TCCTATTCGCGCGGCGCCCA	FBgn0030391	Rab40
CFDlib02475	GTGCTTGTTCTGGGCTCGCG	GAAGAAGGACACGGCTATCG	FBgn0015372	RabX1
CFDlib02477	TTTAATCGGCGACAGCACCG	CGAGTTCCGGTAGTAGGACT	FBgn0029959	Rab39
CFDlib02478	TAAAGCGCAAATCTGGGATA	CCACCGCTCCACGTTCTCGT	FBgn0015790	Rab11
CFDlib02479	CGTCCTGGGCGACTCCGGCG	CACCCAGTTCATCTCCACTG	FBgn0025382	Rab27
CFDlib02480	CTGTTCAAGATCGTCCTCAT	AAACACCATCACCTTGGGCC	FBgn0015793	Rab19
CFDlib02481	CCTAGTGCGCCGCTTTACTC	CACGCAAAGCTACTATCGAT	FBgn0031882	Rab30
CFDlib02482	CGCGTCGCGATAATAGGCGT	GACAACATTCGCGCCTGGCT	FBgn0086913	Rab26
CFDlib02483	CAGCACCGCCGGTTGCCGTT	CGTCCTGGTCTTTTCGACGA	FBgn0037364	Rab23
CFDlib02485	CTGTACAAGATTCTAGTCAT	CTGGAGGCGCACTATCGTAT	FBgn0002567	Rab32
CFDlib02486	CAGCCGCAAGATGTCCCTGG	TTGCCGGAGCTCCCGCACCC	FBgn0039966	Rab21
CFDlib02488	GTGGAGCAGCAACCAAATCA	CTTTGCCATTCAGAAGGGTC	FBgn0086532	Spt-I
CFDlib02492	ATAGAAGCAACTGTACCCTA	TTGGGTAAAGCGCACCACCA	FBgn0023509	mip130
CFDlib02494	GCGCCCTGATAGAGATCTCG	ACTTACTCTCTTGGTGGTGT	FBgn0264386	Ca-alpha1T
CFDlib02497	GGCGTTTGCGATCATCGCTG	TACGTTAATACTCGCACCCA	FBgn0027567
CFDlib02503	AAGGATAAACATATCTATTC	CATAGCTGCAGAAGCCTCTC	FBgn0259178	5PtaseI
CFDlib02506	GGATACATTGCTAAAGCACT	AAATGCAGCTACACTGCATC	FBgn0015400	kek2
CFDlib02519	TACCCGTTTGGTGAGACATT	TCTGGATGAGTGCACGCTGG	FBgn0038206	twf
CFDlib02523	AAGGACGACAGACGTTGGCA	GGTGGATAAAGCATCTCCGG	FBgn0037325
CFDlib02527	CAGCGGGAAACACAGAGCAT	TCTGAATGCTGCTTGTCAGT	FBgn0036643	Syx8
CFDlib02532	AGCTATTCTCGCAGCCGCAG	GTCGCTACTTAGCTGCGAAT	FBgn0036624	RAF2
CFDlib02547	TTTAATGAATTGCTAGCCGT	AGCTACTAATAAAGCTGTAA	FBgn0033021
CFDlib02551	CAGCCGGAACATCTCGTACT	TTGGATCAAATGCAGCACAC	FBgn0033185
CFDlib02599	GCCTGTCCGTGCATCGGCGC	CACAGCGTCCCGTTCCCGCC	FBgn0034012	Hr51
CFDlib02632	ACAATCTTCACGGACTTCTG	GTTGATTATATGCATGAACA	FBgn0016126	CaMKI
CFDlib02642	AATATCTGAAATGTAAGATG	AAATCGGCCGATATTCTGTC	FBgn0032223	GATAd
